# 1 **Trophic niche of the invasive gregarious species *Crepidula*** 2 ***fornicata*, in relation to ontogenic changes**

3

4 Thibault Androuin <sup>1,2</sup>, Stanislas F. Dubois <sup>2</sup>, Cédric Hubas <sup>3</sup>, Gwendoline Lefebvre <sup>4</sup>, Fabienne Le Grand <sup>4</sup>,  
5 Gauthier Schaal <sup>4</sup>, Antoine Carlier <sup>2</sup>.

6

7 <sup>1</sup> ISMER, UQAR, Rimouski, Canada

8 <sup>2</sup> IFREMER, DYNECO-LEBCO, Technopole Brest-Iroise, CS10070, Plouzané, France

9 <sup>3</sup> UMR BOREA, Muséum National d'Histoire Naturelle, Concarneau, France

10 <sup>4</sup> UMR CNRS 6539, LEMAR-IUEM-UBO, Plouzané, France

11

## 12 **Abstract**

13

14 *Crepidula fornicata* is a common and widespread invasive gregarious species along the European coast.  
15 Among its life-history traits, well documented ontogenic changes in behavior (i.e., motile male to sessile female)  
16 suggest a potential shift in feeding strategy across its life stages. Considering the ecological significance of this  
17 species in colonized areas, understanding how conspecifics share the trophic resource is crucial. Using fatty acids  
18 (FA) and stable isotopes (SI) as complementary trophic markers, we conducted a field survey between late winter  
19 and spring to investigate the trophic niche of three ontogenic stages of *C. fornicata* that bear different sexual  
20 (male/female) and motility (motile/sessile) traits. Potential trophic sources were characterized by their pigment,  
21 FA and SI compositions and showed well discriminated compositions over the studied period. We showed that the  
22 biofilm covering *C. fornicata* shells harbored a higher biomass of primary producers (i.e., chlorophytes and  
23 diatoms) than the surrounding sediment. Over the studied period, we observed a covariation between the three  
24 ontogenic stages for both FA and SI compositions which suggest that the trophic niche of *C. fornicata* does not  
25 change significantly across its benthic life. During periods of low food availability, slipper limpets displayed  
26 an opportunistic suspension-feeding behaviour, relying on both fresh and detrital organic matter, likely  
27 coming from superficial sedimentary organic matter. However, during high food availability (i.e., spring  
28 phytoplankton bloom), all ontogenic stages largely benefited from this fresh supply of organic matter (pelagic  
29 diatoms in this case). The three ontogenic stages showed consistent differences in FA composition, and to a  
30 lesser extent in SI composition. These differences persist over time, as they originate from ontogenic  
31 physiological changes (differential growth rates, metabolic rate or gametogenesis) rather than diet  
32 discrepancies. This study revealed that multiple trophic markers allow high complementary to characterize  
33 organic matter as well as food partitioning between conspecific organisms.

34

35 **Key words:** *Crepidula fornicata*, trophic niche, ontogenic shift, fatty acids, stable isotopes, pigments, Bay of Brest

36

37 **Corresponding authors:** [thibault.androuin01@gmail.com](mailto:thibault.androuin01@gmail.com)

38

39

## 40 1. Introduction

41

42

43

44

45

46

47

48

49

50

51

52

53

54

55

The slipper limpet *Crepidula fornicata* is a non-indigenous and invasive gastropod originating from the East coast of the US (Blanchard, 1997). This species extensively colonized shallow soft bottom habitats of European coasts, from Norway to the Mediterranean Sea (Blanchard, 1997). Because of its introduction in many parts of the world and its potential cascading effect on food web functioning (Arbach Leloup et al., 2008; Chauvaud et al., 2000; Cugier et al., 2010), several studies have closely investigated its diet and inferred potential trophic overlap with co-occurring benthic species (Blanchard et al., 2008; P Decottignies et al., 2007; Priscilla Decottignies et al., 2007; Lefebvre et al., 2009; Riera, 2007; Riera et al., 2002). *C. fornicata* is overall considered has an opportunistic suspension-feeder, able to feed on a large array of trophic sources (e.g., phytoplankton, microphytobenthos, macroalgae, bacteria), depending on their availability. Based on stable isotope ratios, it has been hypothesised a potentially large contribution of microphytobenthos, and more specifically benthic diatoms, in the diet of *C. fornicata* (P Decottignies et al., 2007; Guérin, 2004; Lefebvre et al., 2009; Riera, 2007). However, the unexpected presence of inorganic carbonates in *C. fornicata* soft tissues have led to overestimate  $\delta^{13}\text{C}$  ratios in the consumer and then to overestimate the trophic role of microphytobenthos (Androuin et al., 2019).

56

57

58

59

60

61

62

63

64

65

66

67

68

69

70

71

72

73

74

75

76

77

78

79

80

81

82

83

84

85

86

87

88

89

90

91

92

93

94

*C. fornicata* is a hermaphroditic gregarious species, which begins its benthic life as a low-motile male and become a sessile female. Sessile adults form stacks of several non-moving individuals, while juveniles and small males (~10 mm) are motile (Coe, 1936). Adult females are suspension-feeders, but contrary to bivalves, they lack labial palp and showed no anatomical or functional potential for qualitative selection (Beninger et al., 2007). They form a food cord in a groove at the distal end of their gill filaments and ultimately catch this cord with their radula before ingesting it (Shumway et al., 2014). For the related species *Crepidula fecunda*, which exhibits ontogenic behavior changes comparable to those of *C. fornicata*, it has been demonstrated that newly settled individuals first adopt a grazing feeding mechanism and gradually shift to a suspension-feeding behaviour once their gill are fully developed (Montiel et al., 2005). Young individuals are able to use both feeding mechanisms (i.e., grazing and suspension-feeding) during the motile phase of their life cycle (size < 28 mm), whereas females are exclusive suspension-feeders (Chaparro et al., 2002; Navarro and Chaparro, 2002). Such observations have also been suggested for *C. fornicata* but without further behavioral evidence nor quantitative measurements (Breton and Huriez, 2010; Yee and Padilla, 2015). Since *C. fornicata* often occurs in large densities (up to 2000 ind. m<sup>2</sup>) on the seafloor with all ontogenic stages grouped in stacks (Guérin, 2004; Martin et al., 2006), one can expect strong intraspecific interactions for food. These interactions could be either facilitative or competitive depending on ontogenic feeding ecology. While purely suspension-feeding slipper limpets should compete for food among ontogenic stages, recent works suggested that younger individuals may be facilitated by adults, both via a higher substrate availability (de Montaudouin and Accolla, 2018) and through the grazing of microphytobenthic microalgae colonizing adult shells (Androuin et al., 2018). Given that *C. fornicata* often proliferates on muddy and turbid habitats with high suspended inorganic load, grazing behavior of motile males could also prevent the overloading of their digestive tract with inert matter of low nutritional quality (Navarro and Chaparro, 2002).

Different trophic markers have long been used to investigate the trophic niche of marine benthic invertebrates (e.g., Blanchet-Aurigny et al., 2015; Cresson et al., 2016; Dubois and Colombo, 2014) and to describe the origin of assimilated particulate organic matter (hereafter OM) (Ke et al., 2017; Lavaud et al., 2018; Liénart et al., 2017). As mentioned earlier, carbon and nitrogen stable isotopes (SI) are broadly used used to infer trophic niche of consumers (Fry and Sherr, 1984; Layman et al., 2012). Classically, nitrogen isotope ratio informs about the trophic position of a species and carbon isotope ratio reflects the origin of assimilated food sources (e.g., continental vs. oceanic). In coastal ecosystems, the diet of most of benthic primary consumers is composed of a mixture of OM from various origins (phytoplankton, macroalgae, continental detritus, zooplankton, etc) which are often difficult to disentangle with isotopes of only two elements, namely carbon and nitrogen. This diversity of food sources implies that complementary trophic markers are relevant to complement SI intel (Majdi et al., 2018). For instance, pigment analyses have been widely used to study community composition of microscopic primary producers in the water column or in the sediment, since some pigments are specific of clades of algae (Brotas and Plante-Cuny, 2003; Roy et al., 2011). To a lesser extent, fatty acid compositions can be also specific of group of organisms, such as diatoms, bacteria, copepods or vascular plants, (Dalsgaard et al., 2003; Kelly and Scheibling, 2012). Recently, the combined use of SI, FA and pigments improved our understanding of trophic pathways from the sources of particulate OM to benthic primary consumers (Lavaud et al., 2018; Majdi et al., 2018).

95 In this study, we investigated the trophic niche of *C. fornicata* and quantified intra-specific diet shift  
96 associated with ontogenic behavior changes (i.e., motile male to sessile female). For this purpose, we  
97 conducted a field survey and characterized potential OM sources by their SI, FA and pigments compositions  
98 and inferred their assimilation in *C. fornicata* tissues using both SI and FA trophic markers. Based on  
99 previous experimental study in stimulated microphytobenthic biofilm in *C. fornicata* beds (Androuin et al.,  
100 2018), we expect ontogenic trophic shift to happen within stacks, with a higher contribution of biofilm to  
101 motile males than to sessile males and females.

102

## 103 2. Materials and methods

104

### 105 2.1. Sampling strategy

106

107 The bay of Brest (Brittany, France) is a 180 km<sup>2</sup> semi-enclosed marine ecosystem. The sampling  
108 site is located near the Elorn estuary (48°23'N, 4°23', average depth: 10 m) in a dense *C. fornicata* beds  
109 (~2000 ind. m<sup>-2</sup>) (Guérin, 2004). Potential OM sources and *C. fornicata* individuals were collected by  
110 SCUBA divers at five sampling dates (S1 = 26<sup>th</sup> February, S2 = 21<sup>th</sup> March, S3 = 28<sup>th</sup> March, S4 = 12<sup>th</sup> April  
111 and S5 = 14<sup>th</sup> June) around mid and flood tide to ensure homogeneous mixing between estuarine and oceanic  
112 water. The late winter - spring period was chosen to encompass a period with potentially contrasted OM  
113 sources availability (e.g., spring blooms) (Figure 1).

114

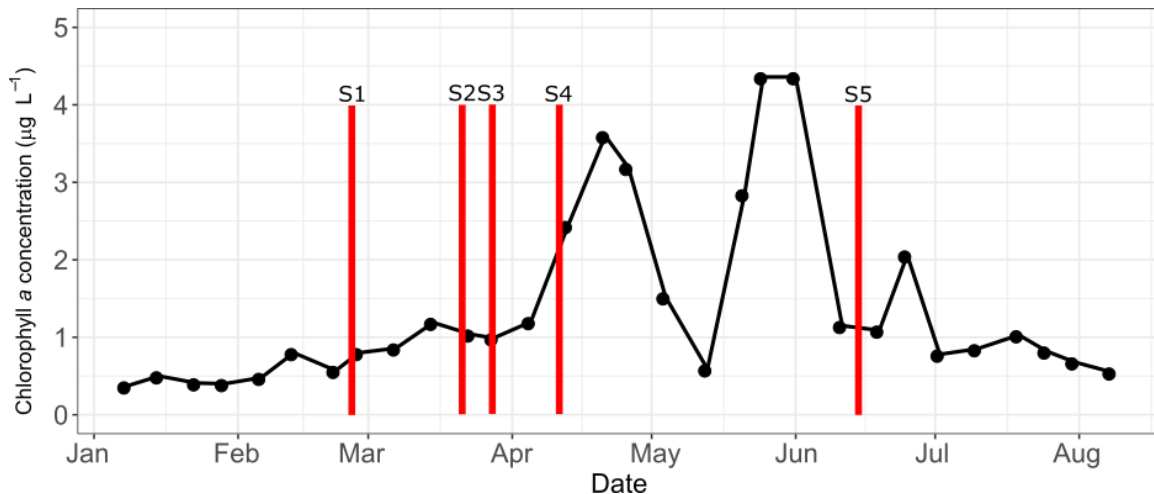

115

116

117

118

**Figure 1: Sampling dates (S1 to S5) at the study site superimposed with weekly chlorophyll *a* concentration at the entrance of the bay of Brest in 2018 (data from the French Coastal Monitoring Network SOMLIT; <http://somlit.epoc.u-bordeaux1.fr/fr/>).**

119

120

121

122

123

124

125

126

127

128

129

130

131

132

133

134

Suspended particulate organic matter (SPOM) was sampled using two 8-liters Niskin bottles at 50 cm above the sediment-water interface, immediately filtered on board onto a 200 µm nylon mesh to remove large zooplankton and particles. In the laboratory, between 1 and 1.5 L was filtered on pre-combusted (450°C for 5 hours) GF/F filters (0.7 µm). Three replicates for each of the three analyses (SI, FA and pigment) were obtained. Superficial sedimentary organic matter (SSOM) was sampled from three cores of 15 cm diameter and 15 cm depth. In the laboratory, the sediment-water interface was re-suspended by flushing seawater with a 30 ml syringe following a standardized process: 60 ml of SSOM was pre-filtered on a 200 µm nylon mesh to being consistent with SPOM samples and filtered on pre-combusted (450°C during 5 hours) GF/F filters (0.7 µm). Three replicates for each of the three analyses were obtained. Biofilm from one *C. fornicata* stacks was scrapped off using a toothbrush and suspended in 600 ml of filtered seawater (0.7 µm). 200 ml of the suspended solution was filtered on pre-combusted (450°C for 5 hours) on GF/F filters (0.7 µm). Three replicates for each of the three analyses were obtained. Filters for FA analysis were put in glass tubes containing 6 ml of chloroform-methanol (2:1, v:v) solution and stored at -80°C before analysis, whereas filters for pigment and SI analysis were immediately stored at -80°C.

Females of *C. fornicata* were sampled at the bottom of the stacks (mean shell length 33 ± 6 mm), attached to a dead *C. fornicata* shell. Sessile and motile males were sampled if they had a penis and a mean

135 shell length of  $20 \pm 8$  mm and  $10 \pm 1$  mm, respectively. We used the digestive gland as a relevant trophic  
136 integrator tissue because it has a higher turnover rate than muscle tissue and is an energy storage organ  
137 enriched in lipids (McCutchan et al., 2003; Vander Zanden et al., 2015). However, since digestive gland and  
138 gonad are fused in a single organ in *C. fornicata*, we analysed both tissues together for sessile males and  
139 females. Because gonads are comparatively small in motile males, the whole body was used to ensure  
140 sufficient lipid concentration. At each date and for each ontogenic stage, both stable isotope (SI) and fatty  
141 acid (FA) analyses of *C. fornicata* were performed on subsamples originating from the same tissue sample.

142

## 143 2.2. Pigment analysis

144

145 The photosynthetic communities of SSOM, biofilm and SPOM have been analyzed by the  
146 quantification of pigments by High Performance Liquid Chromatography (HPLC) according to Brotas and  
147 Plante-Cuny (2003). Filters were crushed and extracted in 3 ml of 95 % cold buffered methanol (2 %  
148 ammonium acetate) for 20 min at  $-20^{\circ}\text{C}$  in the dark. Samples were centrifugated for 3 minutes at 3000 g after  
149 the extraction period. Extracts were then filtered with Whatman membrane filters (0.2 mm) immediately  
150 before HPLC analysis. Pigment extracts were analysed using an Agilent 1260 Infinity HPLC composed of a  
151 quaternary pump (VL 400 bar), a UV-VIS photodiode array detector (DAD 1260 VL, 190–950 nm), and a  
152 100  $\mu\text{l}$  sample manual injection loop (overfilled with 250  $\mu\text{l}$ ). Chromatographic separation was carried out  
153 using a C18 column for reverse phase chromatography (Supelcosil, 25 cm long, 4.6 mm inner diameter). The  
154 solvents used were A: 0.5 M ammonium acetate in methanol and water (85:15, v:v), B: acetonitrile and water  
155 (90:10, v:v), and C: 100 % ethyl acetate. The solvent gradient followed the Brotas and Plante-Cuny method  
156 (2003), with a flow rate of  $0.5 \text{ mL min}^{-1}$ . Identification and calibration of the HPLC peaks were performed  
157 with chlorophyll *a*,  $\beta\beta$ -carotene, chlorophyll *c*2, diatoxanthin, diadinoxanthin and fucoxanthin standards. All  
158 peaks detected were identified by their absorption spectra and relative retention times using the Open Lab  
159 CDS software (ChemStation Edition for LC/MS Systems, Agilent Technologies). Quantification was  
160 performed by repeated injections of standards over a range of dilutions to establish a standard curve of  
161 concentrations. Pigment percentages were expressed relatively to the surface/volume sampled ( $\mu\text{g}\cdot\text{cm}^{-2}$  for  
162 biofilm and SSOM, and  $\mu\text{g L}^{-1}$  for SPOM). We measured the mean surface of three stacks of *C. fornicata* to  
163 standardize surfaces.

164

## 165 2.3. Stable isotope analysis

166

167  $\delta^{15}\text{N}$  and  $\delta^{13}\text{C}$  analyses were carried out independently for both OM sources and *C. fornicata* tissues.  
168 For OM sources, filters were freeze-dried and split in two equal parts. Half of the filter was scrapped off and  
169 weighed in tin capsules for  $\delta^{15}\text{N}$  analysis. The second half was decarbonated using acid-flume (10 N  
170 hydrochloric acid solution) for 7 hours (Lorrain et al., 2003), dried at  $40^{\circ}\text{C}$  for 12 h, scrapped off and weighed  
171 in tin capsules for  $\delta^{13}\text{C}$  analysis. *C. fornicata* samples were freeze-dried and ground into homogenous powder  
172 using a mortar and pestle. Approximately 400  $\mu\text{g}$  of powder was weighed in tin capsules for  $\delta^{15}\text{N}$  analysis.  
173 Because both lipids content and inorganic carbonates can influence  $\delta^{13}\text{C}$  (Androuin et al., 2019; McCutchan  
174 et al., 2003), approximately 400  $\mu\text{g}$  of powder was added to 1 ml of cyclohexane in Eppendorf tubes. Tubes  
175 were vortexed and centrifuged at 3000 g during 5 min. The supernatant was discarded, and the tubes dried at  
176  $40^{\circ}\text{C}$  during 12 h. If the supernatant remained coloured, the sample was re-processed. Lipid-free tissues were  
177 then weighed in silver capsules and in-cup decarbonated using 1N HCl. Each capsule was visually checked,  
178 dried at  $40^{\circ}\text{C}$  during 1 h, and sealed. Samples were analysed for  $\delta^{15}\text{N}$  and  $\delta^{13}\text{C}$  by continuous flow on a  
179 Thermo Scientific Flash EA 2000 elemental analyser coupled to a Delta V Plus mass spectrometer at the Pôle  
180 de Spectrométrie Océan (PSO, Plouzané, France). Results are expressed in standard  $\delta$  notation based on  
181 international standards (Vienna Pee Dee Belemnite for  $\delta^{13}\text{C}$  and atmospheric nitrogen for  $\delta^{15}\text{N}$ ) following  
182 the equation:

183

$$184 \delta = [(R_{\text{sample}}/R_{\text{standard}}) - 1] \times 10^3 \text{ (in ‰)}, \text{ where R is } ^{13}\text{C}/^{12}\text{C} \text{ or } ^{15}\text{N}/^{14}\text{N}.$$

185

186 International isotopic standards of known  $\delta^{15}\text{N}$  and  $\delta^{13}\text{C}$  values were used: IAEA-600 Caffeine, IAEA-CH-  
187 6 Sucrose, IAEA-N-1 and IAEA-N-2 Ammonium Sulphate. The analytical precision was estimated using the  
188 standard deviation of an internal standard (Thermo Acetanilide,  $n = 8$ ), as  $\pm 0.11$  ‰ and  $\pm 0.07$  ‰ for  $\delta^{13}\text{C}$   
189 and  $\delta^{15}\text{N}$  values, respectively.

190

## 191 2.4. Fatty acids analysis

192

193 Freeze-dried powder of *C. formicata* was subsampled for FA analyses: between 2 and 20 mg -  
194 depending on ontogenic stages - were immediately put in glass tubes (previously heated for 6 h at 450°C)  
195 containing 6 mL of a chloroform/methanol mixture (2:1, v:v), and extracted with a Dounce homogenizer.  
196 OM sources and *C. formicata* samples were sonicated during 10 min and kept at -20°C until further analysis.  
197 The total lipid fractions were analyzed in OM sources, whereas only the neutral lipids were analyzed in *C.*  
198 *formicata* samples. The detailed analysis method for separation and methylation is detailed in Le Grand et al.  
199 (2014). Fatty acid methyl esters (FAME) were analyzed in a Varian CP 8400 gas chromatograph (GC)  
200 equipped with a split/splitless injector and a flame-ionization detector (FID). FAMES were identified using  
201 two different capillary columns (ZBWAX 30 m × 0.25 mm i.d., 0.25 µm thickness, Phenomenex®; and ZB-  
202 5HT 30 m × 0.25 mm i.d., 0.25 µm thickness, Phenomenex®) by means of a standard 37 component FAME  
203 mix (Sigma Aldrich®) and other known standard mixtures. FAs were expressed as the molar percentage of  
204 the total FA content.

205

## 206 2.5. Statistical analyses

207

208 Pigment and FA compositions of OM sources, and FA compositions of ontogenic stages of *C.*  
209 *formicata* were represented using a non-metric multidimensional Scaling (n-MDS). Homogeneity of the data  
210 was tested using permutational analyses of multivariate dispersion (PERMDISP) (Anderson, 2001).  
211 Statistical analyses on OM sources (pigments and FA) and *C. formicata* (FA) were conducted using a non-  
212 parametric distanced-based permutation multivariate analysis of variance (PERMANOVA) based on a Bray-  
213 Curtis distance. Analyses were performed using two variables: OM sources or ontogenic stages (3 levels'  
214 factors) and sampling dates (5 levels' factor). Each date was considered independent due to the relative high  
215 turnover rate of both microorganisms found in the OM sources as well as the cells in the sampled tissues in  
216 *C. formicata*. Following significant PERMANOVA results, *post hoc* tests were carried out using multiple  
217 pairwise comparisons with Bonferroni correction to identify differences among factors (Martinez Arbizu,  
218 2017). However, the number of samples at each sampling date ( $3 < n < 5$ ) was not sufficient to allow  
219 significant differences among the two factor levels in interaction, because of lack of statistical power when  
220 using Bonferroni correction in too many multiple comparisons. Therefore, *post hoc* comparisons of  
221 interaction term were not investigated. Finally, a SIMPER analysis was used to identify the FA explaining  
222 most of the dissimilarities between sampling dates and OM sources/ontogenic stages of *C. formicata*.

223 Temporal variations and differences in SI ratios and pigment ratios/FA markers between OM  
224 sources/ontogenic stages of *C. formicata* and sampling dates were assessed using two-way factorial analyses  
225 of variance (ANOVA). When significant, *post hoc* multiple comparisons were carried out using Tukey HSD.  
226 Normality and homogeneity of residuals were graphically assessed. Because concentrations in SPOM were  
227 not comparable with biofilm and SSOM (surface vs. volume), only SSOM and biofilm concentrations were  
228 compared together using the same procedure. Statistical analyses were performed in R version 3.3.0 (R Core  
229 Team, 2016) using packages 'vegan', 'plyr', 'FactoMiner', and 'ggplot'.

230

## 231 3. Results

232

### 233 3.1. Organic matter sources

234

#### 235 3.1.1. Pigments and fatty acids compositions

236

237 Overall, OM sources were well discriminated by their pigment compositions (Figure 2a), and by  
238 their FA compositions (Figure 2b).

239 Pigment compositions significantly differed between OM sources and sampling dates ( $p < 0.001$  in both  
240 cases) and the interaction between the two factors was significant ( $p < 0.001$ ). SIMPER analysis revealed  
241 that 80 % of the variability was explained by 7 pigments (Table S1). The biofilm was characterized by higher  
242 percentages of chlorophyll b and neoxanthin, together with one unknown pigment. SSOM was characterized  
243 by pheophytin *a*, pheophorbide *a*, and to a lesser extent lutein, whereas fucoxanthin and alloxanthin mainly  
244 discriminated SPOM. Temporal variations were mainly driven by a constant increase in both pheophorbide  
245 *a* and pheophytin *a* percentages for all OM sources. Fucoxanthin also showed an increase over time, except  
246 for SPOM and SSOM at S5 (Table S1).

247 Similarly, FA compositions also significantly differed between OM sources ( $p < 0.001$   
248 in both cases), and the two factors showed a significant interaction ( $p < 0.001$ ). According to the SIMPER  
249 analysis, SSOM was characterized by higher percentages of 22:0, 16:1n-7, 18:1n-7 and a lower percentage  
250 of 16:0 (Table S2). The FA 18:0 and 20:4n-6 mostly discriminated biofilm whereas SPOM had higher  
251 percentages of 14:0 and 22:2n-6, and a lower percentage of 20:5n-3. In terms of temporal variations, both  
252 biofilm and SPOM showed similar decrease in saturated FA (i.e., 16:0 and 18:0) and increase in 16:1n-7 and  
253 20:5n-3, especially between S4 and S5 (Table S2). SSOM exhibited less variable FA composition over time.  
254

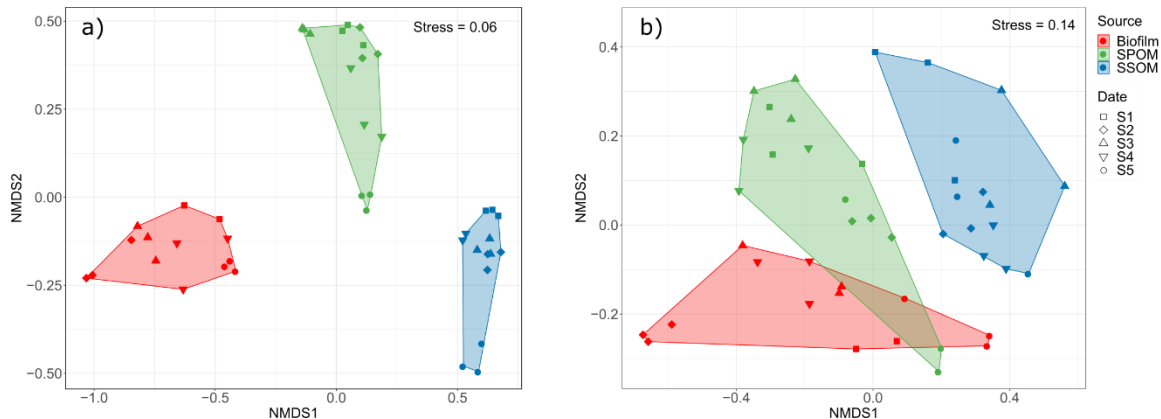

255  
256 **Figure 2: n-MDS based on the total pigment (a) and fatty acid (b) compositions of organic matter**  
257 **sources (Biofilm, suspended particulate organic matter (SPOM), superficial sedimentary organic**  
258 **matter (SSOM)). S1 to S5 correspond to the sampling dates (S1 = 26<sup>th</sup> February, S2 = 21<sup>st</sup> March, S3 =**  
259 **28<sup>th</sup> March, S4 = 12<sup>th</sup> April and S5 = 14<sup>th</sup> June).**  
260

261 Total FA concentration did not show significant temporal variations for any OM sources (Figure  
262 3a), with the biofilm always exhibiting higher concentration of total FA than SSOM ( $p < 0.05$  at each  
263 sampling date). Chlorophyll (chl) *a* concentration increased over time in PPOM up to sampling date S4 ( $1.8$   
264  $\pm 0.2 \mu\text{g L}^{-1}$ ) ( $p < 0.05$ ) as well as in biofilm (reaching  $3.9 \pm 1 \text{ mg m}^{-2}$  at S5) even if differences were not  
265 significant due to high between-samples variability (Figure 3b). Chl *a* concentration in SSOM remained  
266 constant and was lower than in biofilm for each date ( $p < 0.05$  in all cases). Fucoxanthin concentration  
267 increased over time for both SPOM and SSOM ( $p < 0.05$  and  $p < 0.05$ , respectively), followed by a decrease  
268 in S5 (Figure 3c). Fucoxanthin concentration is the highest in biofilm, which showed a similar increasing  
269 trend that is not statistically supported because of high variability between samples. The chl *b*: chl *a* ratio  
270 was 3 to 7-fold higher for biofilm than for SSOM ( $p < 0.001$ ) and SPOM ( $p < 0.001$ ) (Figure 3d).  
271 Fucoxanthin: chl *a* (Figure 3e) and chl *c*: chl *a* (Figure 3f) ratios did not show clear temporal patterns for any  
272 OM sources and. However, they were 5 to 50-fold higher in SSOM than in SPOM ( $p < 0.001$ ) and biofilm  
273 ( $p < 0.001$ ) over the studied period, respectively.

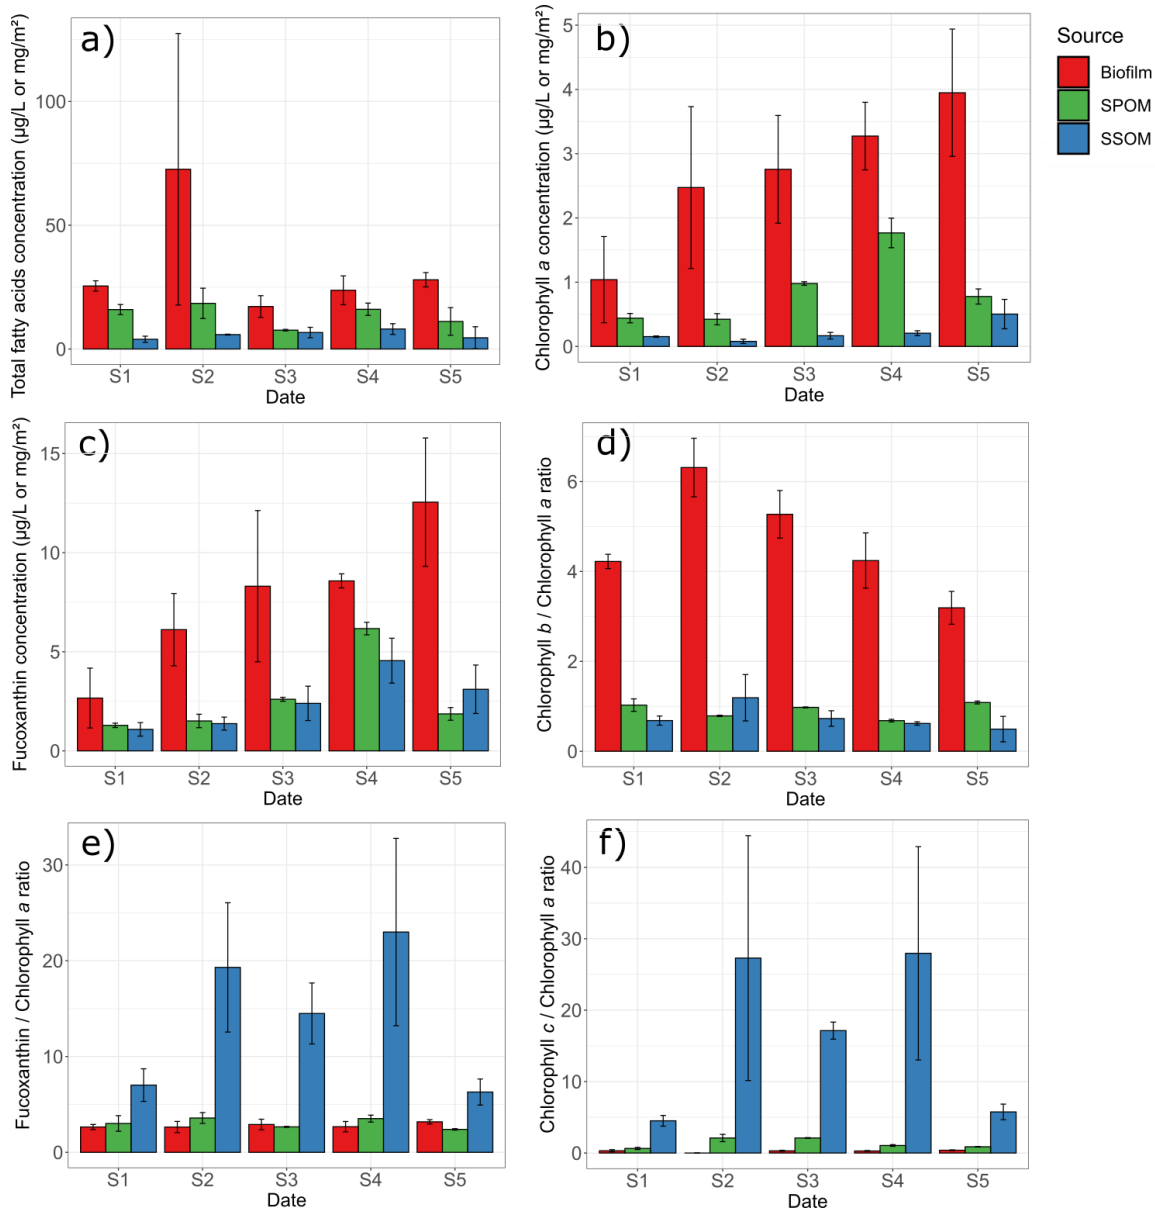

274  
275 **Figure 3: Total fatty acids (a), chlorophyll a (b) and fucoxanthin (c) concentrations, and ratios between**  
276 **chlorophyll b (d), fucoxanthin (e), and chlorophyll c (f) over chlorophyll a (mean ± SD, n ≥ 2) of organic**  
277 **matter sources (Biofilm, suspended particulate organic matter (SPOM), superficial sedimentary**  
278 **organic matter (SSOM)). S1 to S5 correspond to the sampling dates (S1 = 26<sup>th</sup> February, S2 = 21<sup>st</sup>**  
279 **March, S3 = 28<sup>th</sup> March, S4 = 12<sup>th</sup> April and S5 = 14<sup>th</sup> June).**  
280

### 281 3.1.2. Stable isotopes composition

282

283

284 The three OM sources were well discriminated by their  $\delta^{13}\text{C}$  and  $\delta^{15}\text{N}$  values over the studied period.  
285 Their  $\delta^{13}\text{C}$  signal varied significantly according to both OM sources and sampling dates, and the interaction  
286 between the two factors was significant ( $p < 0.001$ ,  $p < 0.01$  and  $p < 0.001$ , respectively). PPOM was always  
287 depleted in  $^{13}\text{C}$  compared to RPOM ( $p < 0.001$  at each date) and biofilm ( $p < 0.01$  at each date) (Figure 4a,  
288 Table S3). Significant temporal  $\delta^{13}\text{C}$  variations were only observed in biofilm, with higher values at S5 than  
289 at S2 ( $p < 0.001$ ) or S4 ( $p < 0.001$ ). Biofilm was significantly enriched in  $^{15}\text{N}$  compared to both PPOM ( $p <$   
290  $0.001$ ) and RPOM ( $p < 0.001$ ) (Figure 4b, Table S3). There was no interaction between OM sources and  
sampling dates ( $p = 0.26$ ).

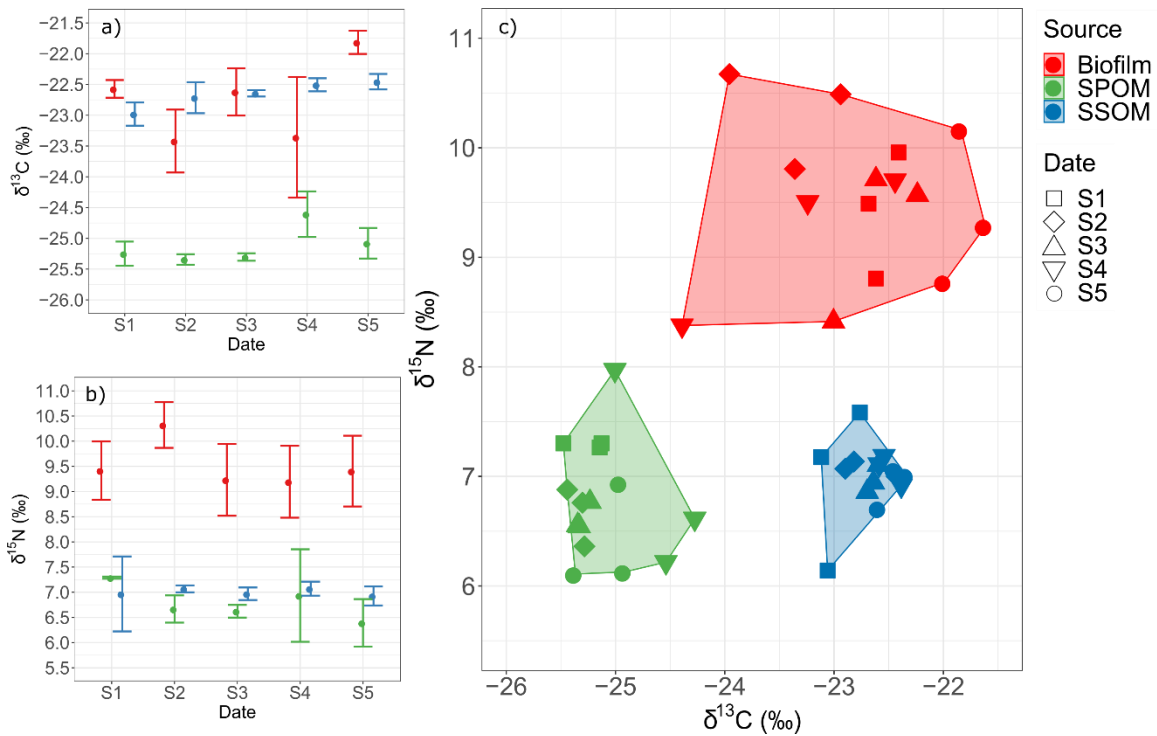

291  
292  
293  
294  
295  
296

**Figure 4:**  $\delta^{15}\text{N}$  (a) and  $\delta^{13}\text{C}$  (b) isotopic compositions (mean  $\pm$  SD,  $n = 3$ ), and overall isotopic biplot (c) obtained of organic matter sources (Biofilm, suspended particulate organic matter (SPOM), superficial sedimentary organic matter (SSOM)). S1 to S5 correspond to the sampling dates (S1 = 26<sup>th</sup> February, S2 = 21<sup>st</sup> March, S3 = 28<sup>th</sup> March, S4 = 12<sup>th</sup> April and S5 = 14<sup>th</sup> June).

### 297 3.2. *Crepidula fornicata*

298

#### 299 3.2.1. Fatty acids composition

300

301 FA composition of *C. fornicata* significantly differed between ontogenic stages and sampling dates  
302 ( $p < 0.001$  in both cases) and the interaction between the two factors was significant ( $p < 0.001$ ). The analysis  
303 of multivariate dispersion was also significant ( $p < 0.05$ ), indicating that multivariate dispersion was not  
304 homogeneous. This was clearly illustrated by the n-MDS (when comparing the convex hull areas) where  
305 motile males showed much higher variation than sessile females and sessile males exhibited an intermediate  
306 level of variation (Figure 5). Pairwise SIMPER analyses between ontogenic stages revealed that sessile males  
307 were mainly characterized by saturated FA 16:0 and 18:0, especially at the two first sampling dates (Table  
308 S4). Sessile females differed from both motile and sessile males by higher percentages of C<sub>20</sub> FA such as  
309 20:5n-3, 22:6n-3 and 20:1n-11, but also higher percentages of odd branched FA as iso17:0 (Table S4). Sessile  
310 males showed an overall comparable FA composition than sessile females but exhibited higher variability  
311 between sampling dates, as shown by the n-MDS. The SIMPER analyses performed between dates revealed  
312 that FA that most contributed to the observed temporal changes were the FA 16:0, 18:0 and 22:6n-3  
313 decreasing over time, and the FA 20:5n-3 and 16:1n-7 increasing over time, all accounting for approximately  
314 45 % of the dissimilarity over the 5 sampling dates (Table S4).



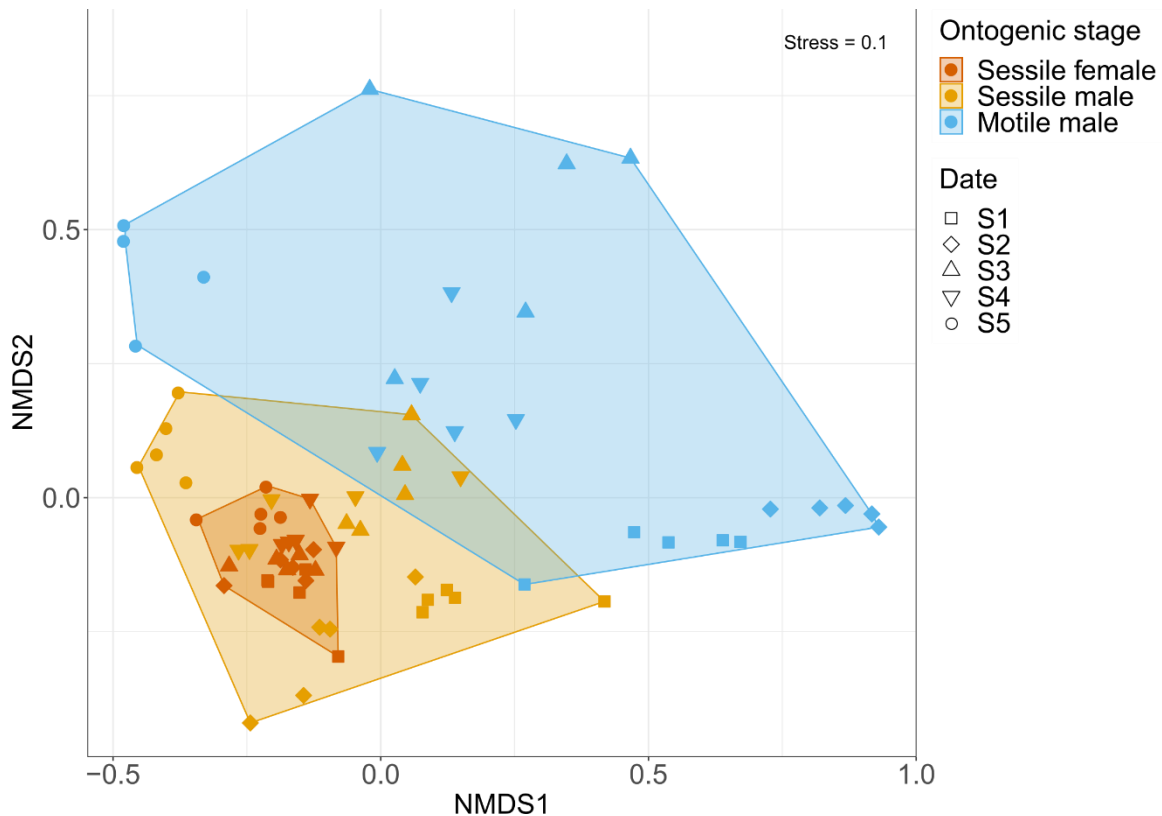

315

316

317 **Figure 5: n-MDS based on the total fatty acid compositions of ontogenic stages of *Crepidula fornicata***

318 **(motile males, sessile males, sessile females). S1 to S5 correspond to the sampling dates (S1 = 26<sup>th</sup>**

319 **February, S2 = 21<sup>st</sup> March, S3 = 28<sup>th</sup> March, S4 = 12<sup>th</sup> April and S5 = 14<sup>th</sup> June).**

319

320

321 All FA percentages and ratios changed significantly between sampling dates ( $p < 0.001$  in all cases)

322 and between ontogenic stages ( $p < 0.05$  in all cases, except for 16:1n-7 and 18:4n-3). The interaction terms

323 were always significant ( $p \leq 0.05$ ). Overall, temporal variations in FA composition were the highest in motile

324 males, the lowest for females and intermediate for sessile males.

325 PUFA/SFA ratio increased over time for both motile and sessile males but remained constant in females

326 (Figure 6a). There was no significant difference between ontogenic stages at sampling date S5. The relative

327 abundance of branched FA was quite variable but significantly higher in sessile females than in motile males

328 ( $p > 0.05$ ) (Figure 6b). The highest values in branched FA was recorded in sessile females at S1 ( $11.2 \pm 4.3$ )

329 and the lowest in sessile males at S5 ( $3.8 \pm 1$ ). The ratio between 20:5n-3 and 22:6n-3 exhibited temporal

330 variations for all ontogenic stages (Figure 6c), with a strong increase in S5 ( $p < 0.001$  in all cases) where

331 values ranged from  $2.5 \pm 0.5$  in sessile females to  $4 \pm 0.6$  in motile males. The FA 16:1n-7 followed the same

332 trend as the 20:5n-3 / 22:6n-3 ratio with a more gradual increase over time for all ontogenic stages (Figure

333 6d). The highest values (from  $3.6 \pm 0.9$  in sessile females to  $6.4 \pm 1.9$  in motile males) were also recorded at

334 S5. The FA 18:4n-3 also showed strong temporal variations in all ontogenic stages (Figure 6e), with an

335 increase up to S4 followed by a decrease at S5. Finally, the n-3/n-6 ratio showed no temporal variation for

336 sessile females but increased significantly over time up to S4 in both sessile ( $p < 0.01$  in all cases) and motile

336 males ( $p < 0.05$  in all cases) (Figure 6f).

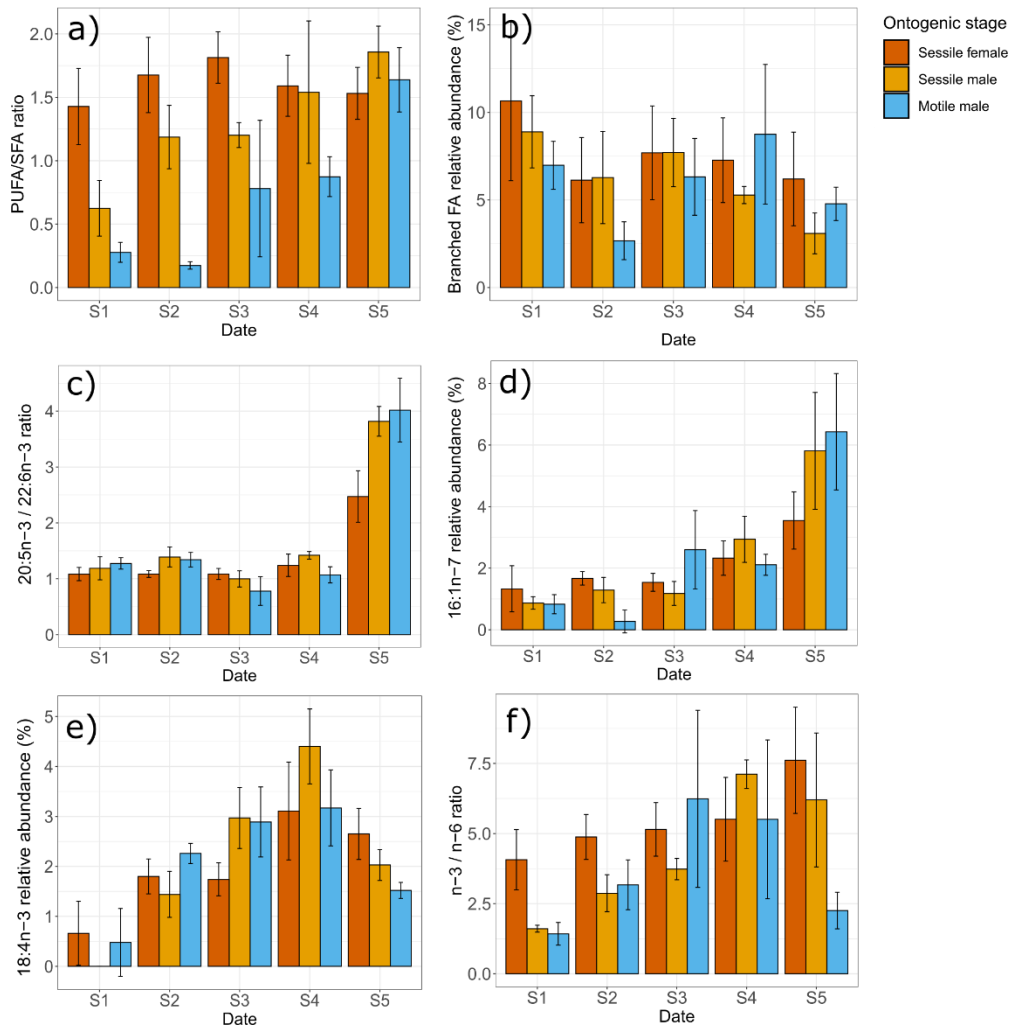

337  
338  
339  
340  
341  
342  
343

**Figure 6: Relative abundance of fatty acids (FA) in the three ontogenic stages of *Crepidula fornicata* (motile males, sessile males, sessile females) (mean  $\pm$  SD, n = 5): (a) Polyunsaturated FA / Saturated FA ratio, (b) Branched FA, (c) 20:5n-3 / 22:6n-3 ratio, (d) 16:1n-7, (e) 18:4n-3 and (f) n-3/n-6 ratio. S1 to S5 correspond to the sampling dates (S1 = 26<sup>th</sup> February, S2 = 21<sup>st</sup> March, S3 = 28<sup>th</sup> March, S4 = 12<sup>th</sup> April and S5 = 14<sup>th</sup> June).**

### 344 3.2.2. Stable isotopes composition

345  
346  
347  
348  
349  
350  
351  
352

Overall, the three ontogenic stages exhibited similar isotopic patterns over time (Figures 7a and 7b, respectively). No interactions were found between ontogenic stage and sampling date, both for carbon ( $p = 0.6$ ) and nitrogen ( $p = 0.27$ ). Motile males were significantly depleted in  $^{13}\text{C}$  compared to sessile females ( $p < 0.05$ ) and significantly depleted in  $^{15}\text{N}$  compared to both sessile females ( $p < 0.001$ ) and males ( $p < 0.05$ ). Significant temporal variations were observed for  $\delta^{13}\text{C}$  ( $p < 0.001$ ) with a marked  $^{13}\text{C}$  enrichment at S5 compared to all other sampling dates ( $p < 0.05$  in all cases), up to 2 ‰ when compared to S4. A significant temporal decrease in  $\delta^{15}\text{N}$  was found ( $p < 0.001$ ) for all ontogenic stages.

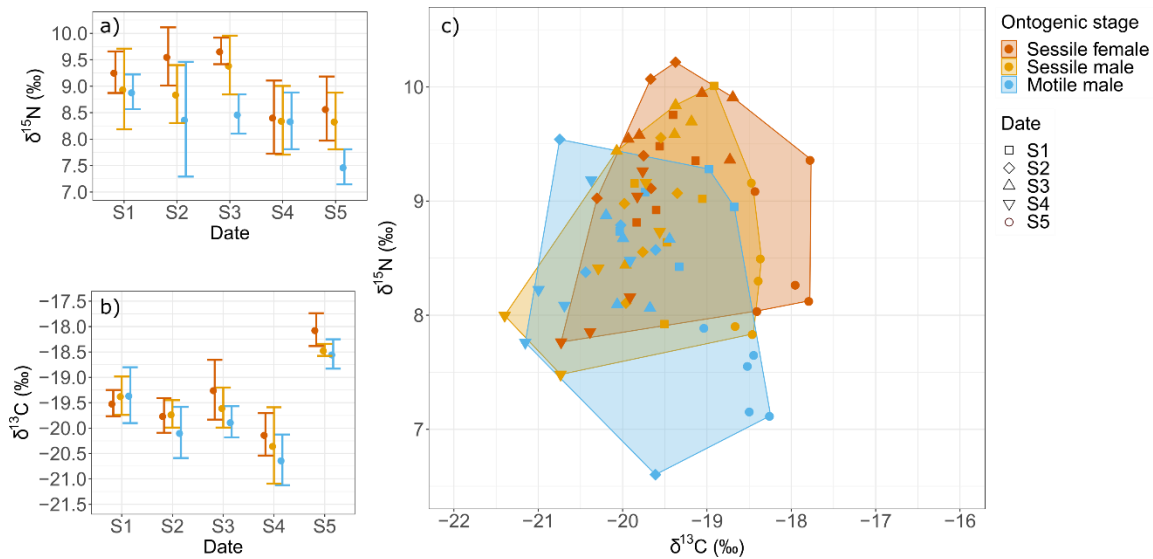

353  
354 **Figure 7:  $\delta^{15}\text{N}$  (a) and  $\delta^{13}\text{C}$  (b) isotopic compositions (mean  $\pm$  SD,  $n = 5$ ), and corresponding isotopic**  
355 **biplot (c) for three ontogenic stages of *Crepidula fornicata* (motile males, sessile males, sessile females).**  
356 **S1 to S5 correspond to the sampling dates (S1 = 26<sup>th</sup> February, S2 = 21<sup>st</sup> March, S3 = 28<sup>th</sup> March, S4 =**  
357 **12<sup>th</sup> April and S5 = 14<sup>th</sup> June).**

358

#### 359 4. Discussion

360

361 *C. fornicata* is a widespread invasive gregarious gastropod. The aim of this study was to investigate  
362 the trophic niche of this species and quantified intra-specific diet shift associated with ontogenic behavior  
363 changes (i.e., motile male to sessile female). A multi trophic markers assessment was conducted over spring  
364 to characterized potential OM sources and inferred their assimilation in *C. fornicata* tissues.

365

#### 366 4.1. Composition and availability of potential food sources

367

368 Suspended particulate (SPOM) and superficial sedimentary (SSOM) organic matter as well as  
369 biofilm associated with *C. fornicata* shells were well discriminated by their pigment, fatty acid and stable  
370 isotope compositions, for each sampling date. When compared to marine POM ( $-22.3 \pm 1.2$  ‰), as measured  
371 over the same period close to the mouth of the bay of Brest (data from the French Coastal Monitoring  
372 Network SOMLIT; <http://somlit.epoc.u-bordeaux1.fr/fr/>) and terrestrial POM ( $-27.5 \pm 1.2$  ‰), as measured  
373 in terrestrial inputs nearby our study site by Mortillaro et al. (2014), the  $\delta^{13}\text{C}$  obtained for SPOM ( $-25.4 \pm 0.7$   
374 ‰) suggests a significant terrestrial influence at our study site, as mentioned by Marchais et al. (2013). SPOM  
375 over our studied period showed comparable chlorophyll *a* biomass ( $0.4 - 1.8 \mu\text{g L}^{-1}$ ) than currently  
376 encountered in other areas of the bay of Brest (ca.  $0.3 - 5 \mu\text{g L}^{-1}$ , Chatterjee et al. 2013). High percentage of  
377 fucoxanthin and alloxanthin suggested the presence of Bacillariophyta (i.e., diatoms) and Cryptophyta in the  
378 water column, respectively (Brotas and Plante-Cuny, 2003; Roy et al., 2011).

379 Using the SOMLIT weekly monitoring of chlorophyll *a* and marine POM  $\delta^{13}\text{C}$ , a typical  $^{13}\text{C}$  enrichment ( $\sim 3$   
380 ‰) was noticeable during a phytoplankton bloom that occurred between May 25<sup>th</sup> and June 1<sup>st</sup> in the bay.  
381 This bloom was mainly composed by three diatoms: *Cerataulina pelagica* ( $1.1 \cdot 10^6$  cells  $\text{L}^{-1}$ ),  
382 *Leptocylindricus danicus* ( $4.7 \cdot 10^4$  cells  $\text{L}^{-1}$ ) and *Rhizosolenia imbricata* ( $1.2 \cdot 10^4$  cells  $\text{L}^{-1}$ ) (data extracted  
383 from the REPHY network, IFREMER). While this bloom was not sampled in the PPOM sampling set, the  
384  $^{13}\text{C}$  enrichment was evidenced in the individuals of *C. fornicata* collected at S5 (14<sup>th</sup> June).

385 Among the three sources of organic matter, SSOM showed the most homogeneous isotopic  
386 composition over time, which is unexpected as SSOM is often considered as a mixture of pelagic and benthic  
387 OM sources and consequently highly variable according to OM sources proportions and isotopic  
388 compositions SSOM appeared here as a complex mixture of low and high quality OM (Lefebvre et al., 2009;  
389 Rigolet et al., 2014). On one hand, it was characterized by i) pheophorbide *a* and pheophytin *a*, which are  
390 degradation products of chlorophyllide *a* and chlorophyll *a*, respectively (Brotas and Plante-Cuny, 1998;  
391 Cartaxana et al., 2003), ii) odd branched FA (such as ant15:0) and the 18:1n-7 indicating the presence of

392 bacteria (Hubas et al., 2017; Jaschinski et al., 2011; Meziane et al., 1997) and iii) the long chain saturated  
393 fatty acids 22:0 which confirms the presence of a refractory terrestrial contribution in this environment  
394 (Canuel, 2001). On the other hand, SSOM exhibited the highest PUFA/SFA ratio most of the time (Table  
395 S1), suggesting higher quality/labability compared to SPOM and biofilm (Connelly et al., 2015, 2016; Parrish  
396 et al., 2005). This was confirmed by high Fucoxanthin / Chl *a* and Chl *c* / Chl *a* ratios which indicated a  
397 higher contribution of diatoms in SSOM than in SPOM and biofilm (Brotas and Plante-Cuny, 2003).  
398 Interestingly, fucoxanthin concentrations measured both in SSOM and biofilm were comparable to those  
399 observed on intertidal mud flats (Barranguet et al., 1997; Cartaxana et al., 2006). This blue-light absorbing  
400 pigment, and the very low light irradiance of our study site (0.01 %, Figure S1) strongly suggested that low  
401 light acclimated diatoms contributed to the SSOM at our study site (McGee et al., 2008).

402 Biofilm scrapped on shells of *C. fornicata* showed higher chlorophyll *a* concentration than the  
403 surrounding sediment, suggesting higher biomass of primary producers on shells (Androuin et al., 2018). The  
404 high percentages of chl *b* and neoxanthin, as well as the Chl *b* / Chl *a* ratio in the biofilm also suggest that  
405 chlorophytes were abundant on shells (Brotas and Plante-Cuny, 2003). While these results were not supported  
406 by FA (e.g., 18:3n-3 or 18:4n-3 characterizing chlorophytes, Fleurence et al. 1994), mollusk shells are  
407 currently inhabited by microchlorophytes or macrochlorophytes propagules (Barillé et al., 2017; Mineur et  
408 al., 2007). FA characterizing the biofilm were 18:0 and 20:4n-6. While 18:0 is an ubiquitous FA in marine  
409 environment (Kelly and Scheibling, 2012), the 20:4n-6 can be found in large proportion in red algae but also  
410 in brown ones (Fleurence et al., 1994; Kelly and Scheibling, 2012). It is worth noting that *C. fornicata* shells  
411 were partly covered with crustose red algae in our study site (pers. obs.). The high concentration of  
412 fucoxanthin also suggests the presence of high biomass of diatoms on these shells, as already mentioned by  
413 Ní Longphuirt et al. (2007). For instance, the biomass in biofilm was ~10 times higher than in the surrounding  
414 SSOM. The fact that biofilm was <sup>15</sup>N-enriched by ~2.5 ‰ compared to SSOM may indicate that primary  
415 producers that compose this biofilm could use dissolved nitrogen derived from *C. fornicata*'s excretion  
416 products, which is a well-known process in benthic coastal ecosystems (Arzul, 2001; Prins et al., 1998;  
417 Ragueneau et al., 2002). While the excretion product (i.e., ammonium) is expected to be <sup>15</sup>N-depleted relative  
418 to *C. fornicata* tissues (DeNiro and Epstein, 1981), it could still be <sup>15</sup>N-enriched compared to the available  
419 dissolved nitrogen in the environment (Cifuentes et al., 1989; Raimonet et al., 2013; Wainright and Fry,  
420 1994). This could indicate that nutrients are not a limiting factor for primary producers inhabiting *C. fornicata*  
421 shells, making them available for benthic consumers throughout the year provided that sufficient light reach  
422 the sea floor. The fact that chlorophyll *a* concentration decreased in SPOM after the spring bloom, but not in  
423 the biofilm, strongly support this hypothesis.

#### 424 425 **4.2. Trophic niche of *C. fornicata*, in relation to ontogenic changes**

426  
427 Trophic markers suggested an overall similar trophic niche of *Crepidula fornicata* across ontogenic  
428 stages, as shown by the covariation in both SI and FA compositions over the studied period. The slipper  
429 limpet is an opportunistic suspension-feeder that exploits both pelagic and benthic particulate OM in varying  
430 proportions according to the season and sources availability. However, differences in FA composition, and  
431 to a lesser extent in SI composition, were noticeable between ontogenic stages. These differences at each  
432 sampling date likely reflect ontogenic physiological changes link to growth rate and energetic demand rather  
433 than profound changes in diet.

434  
435 Overall, SI ratios showed that all ontogenic stages had similar isotopic niches, although the niche of  
436 sessile females does not fully overlap with those of motile males. According to the respective SI ratios of  
437 potential food sources (Biofilm, SPOM, SSOM and marine POM) and those of *C. fornicata* tissues, and  
438 considering classical diet to consumer trophic enrichment factor (~ 0.75 - 1 ‰ for carbon and ~2.5 - 2.74 ‰  
439 for nitrogen, (Caut et al., 2009; McCutchan et al., 2003), it is likely that *C. fornicata* relies either on SSOM  
440 or marine POM depending of the season and food availability in the water column. During lower food  
441 availability period (i.e., end of winter and early spring), it is difficult to disentangle SSOM from marine POM  
442 since their SI signals do not differ. However marine POM was sampled close to the Bay entrance with higher  
443 oceanic influence, whereas SPOM was sampled just above the *C. fornicata* beds around mid and flood tide  
444 to ensure mixing with oceanic water. Therefore, SPOM was readily more available than marine POM for the  
445 slipper limpet. It is then reasonable to assume that SI composition of *C. fornicata* refers to SSOM rather than  
446 marine POM, which can be exploited through regular resuspension events linked to tidal currents (Beudin,  
447 2014). After the spring phytoplankton bloom that occurred in the bay of Brest at the end of May, producing

448 a  $^{13}\text{C}$  enrichment in the water column ( $\sim 3\text{‰}$ ), a similar  $^{13}\text{C}$  enrichment was found for all stages of *C. fornicata*  
449 ( $\sim 2\text{‰}$ ). These results clearly showed that adults as well as young individuals of *C. fornicata* benefited from  
450 the spring bloom. However, minor but consistent isotopic differences were also found between ontogenic  
451 stages at each sampling date, which cannot necessarily be attributed to an ontogenic diet shift. Indeed,  
452 inferring diet shift using SI ratios may be hampered by the effects of physiological changes occurring during  
453 ontogeny such as gonadal maturation, metabolic rate or differential tissue growth between young and adults.  
454 Such physiological processes can modify the isotope signal of tissues even without significant change of diet,  
455 as evidenced in several species (Blanchet-Aurigny et al., 2012; Hentschel, 1998; Rossi et al., 2004). The  
456 isotopic dynamic also depends on tissue turnover rate (McCutchan et al., 2003; Vander Zanden et al., 2015).  
457 Lefebvre and Dubois (2016) analysed trophic enrichment factor and turnover rate in several marine benthic  
458 invertebrates, including *C. fornicata*. They showed a clear negative relationship between growth and  
459 enrichment factor values: when the body mass is increasing rapidly and the individual growing fast (high  
460 turnover), enrichment factors are expected to be low, and conversely. Young motile males of *Crepidula*  
461 *fornicata* are growing more rapidly than larger sessile males or even larger females (Hoagland, 1978; Walne,  
462 1956), and consequently have a higher growth rate and a higher metabolic rate (Bayne and Newell, 1983).  
463 Enrichment factors are then expected to be much smaller for motile males, than sessile males or females, for  
464 which energy allocation is mainly directed to gamete production rather than other tissue growth. So, a similar  
465 diet in all ontogenic stages could very likely lead to differences in SI ratios such as those presented in Figure  
466 7c. Even if motile males were analysed *in toto* (including muscle tissue with longer turnover rate), we believe  
467 that this does not biased interpretations of between-stages differences over the studied period. Analysing only  
468 tissues with fast turnover rate (as we did for sessile individuals) would have increased these between-stages  
469 differences.

470  
471 Neutral lipids represent essential energy reserves for sustaining early life stages of marine molluscs  
472 and play a key role in their settlement, habitat selectivity and recruitment (Barbier et al., 2017; Pernet and  
473 Tremblay, 2004; Tremblay et al., 2007). Contrary to polar lipids, mostly involved in membrane regulation,  
474 FA incorporated in the neutral fraction are largely unaltered and reflect the diet in a more straightforward  
475 manner than polar lipids (Dalsgaard et al., 2003). Therefore, extracting FA from this specific class of lipids  
476 from a tissue with a rapid turnover (i.e., digestive gland) should allow assessing rapid changes in the diet  
477 (McCutchan et al., 2003). As suggested above by SI data, FA profiles showed a clear temporal variation in  
478 food sources utilization for the three ontogenic stages. This temporal pattern resulted from three distinct  
479 groups of sampling dates (Figure 5). The two first ones (S1 and S2) likely corresponded to a period that  
480 integrated the trophic signal of winter season's food sources, whereas the last one (S5) clearly corresponded  
481 to the assimilation of the spring phytoplankton bloom. The two-intermediate sampling dates (S3 and S4)  
482 corresponded to the transition with an increase in food availability. As shown earlier with SI, all ontogenic  
483 stages of *C. fornicata* may have probably exploited SSOM before the spring bloom when food in the water  
484 column is less available. In this pool of OM, FA revealed that slipper limpets likely fed on benthic diatoms  
485 (as suggested by 16:1n-7 and 20:5n-3; Dunstan et al. 1992; Napolitano et al. 1997; Passarelli et al. 2012),  
486 dinoflagellates (22:6n-3; Zhukova and Aizdacher 1995; Lavaud et al. 2018) and bacteria (Branched FA and  
487 18:1n-7; Perry et al. 1979; Zhukova et al. 1992; Haack et al. 1994), which is in agreement with previous  
488 interpretations done in other comparable coastal bays (Dubois et al., 2014; Leroy et al., 2013). In sediment,  
489 bacteria are often associated with detritus and are therefore not considered as a high-quality food source  
490 (Dalsgaard et al., 2003). This is confirmed by the PUFA/SFA ratio, a biomarker of fresh vs. detritic OM  
491 (Connelly et al., 2015, 2016; Parrish et al., 2005), which was lower in the slipper limpet ( $\sim 1.5$ , our study)  
492 than in other suspension-feeding species of the bay of Brest, such as *Pecten maximus* ( $\sim 2.8$ , Lavaud et al.  
493 2018) or *Ophiotrix fragilis* ( $\sim 2$ , Blanchet-Aurigny et al. 2015). The fact that *C. fornicata* lacks pre-ingestive  
494 mechanisms for particle selection likely explains their opportunistic trophic behaviour based on both fresh  
495 and detritic organic matter (Beninger et al., 2007). After spring bloom, the percentages of diatom's markers  
496 16:1n-7 and 20:5n-3 drastically increased in *C. fornicata*'s tissue, as well as the 20:5n-3/22:6n-3 ratio,  
497 confirming that all ontogenic stages of *C. fornicata* benefit from this food supply from the water column  
498 (Budge and Parrish, 1998; Lavaud et al., 2018).

499 Besides, the FA 18:4n-3 showed an increasing contribution over time for ontogenic stages.  
500 According to the literature, this FA may originate from different primary producers such as dinoflagellates  
501 (Budge and Parrish, 1998) or green macroalgae (Fleurence et al., 1994; Kelly and Scheibling, 2012).  
502 Considering the absence or low temporal variation observed for others dinoflagellate biomarkers (peridinin  
503 pigment and 22:6n-3 FA) in the OM sources and the frequent seasonal accumulation of green macroalgae

504 near our study site (Study Centre for Algal Promotion, <http://www.ceva.fr>; Ragueneau et al. 2018), we can  
505 expect a seasonal trophic role of these green macroalgae for *C. fornicata* at our study site, probably in the  
506 form of detrital particles. The FA 20:1n-11 was found in relative high abundance in *C. fornicata* (4-6 %).  
507 Although it is known to be a biomarker of copepod in tropical estuaries (Bachok et al., 2003), the <sup>15</sup>N-  
508 enrichment of *C. fornicata* compared to SPOM was not high enough to suggest a significant contribution of  
509 zooplankton in its diet (Kopp et al., 2015). Comparable percentages of 20:1n-11 were reported for *Ophiotrix*  
510 *fragilis* in the bay of Brest (Blanchet-Aurigny et al., 2015), evidencing that this FA was not a good biomarker  
511 of zooplankton for the species considered.  
512

513 Contrary to SI, FA compositions of the three ontogenic stages of *C. fornicata* showed low overlap,  
514 especially between motile and sessile limpets. Considering that lipids and fatty acids profiles are age- and  
515 sex-specific (Correia et al., 2003; Pernet et al., 2012), some changes in FA compositions are then likely to  
516 originate from physiological changes between ontogenic stages. During winter period, motile males were  
517 characterized by higher proportions of SFA such as 16:0 (25-34 %) and 18:0 (27-36 %). These FA are very  
518 common in marine organisms and do not necessarily reflect a specific diet (Dalsgaard et al., 2003; Kelly and  
519 Scheibling, 2012). Moreover, despite the dietary interest of short-chain SFA, where energy is more efficiently  
520 released via beta-oxidation than for PUFA (Langdon and Waldock, 1981), temperature may also influence  
521 the process of their utilization (Pernet et al., 2007). For example, it has been experimentally demonstrated  
522 that cold-acclimated oysters (5-7°C) have a clear preference for PUFA (n-3) over SFA (16:0) as fuel for  
523 energy compared to ‘temperate’ oysters (Chu and Greaves, 1991). The lower utilization of SFA in cold-  
524 acclimated oysters has been attributed to the fact that SFA are not in the liquid phase under cold temperature,  
525 thus making them less accessible for catabolic processes. In *Crepidula fornicata*, young individuals have  
526 proportionally less energy reserves than adults (Guérin, 2004) and are more subjected to low temperature  
527 effects due to a higher surface-to-volume ratio (Diederich et al., 2015). Hence, the lower utilization of SFA  
528 could explain their higher SFA percentages during winter period in the bay of Brest, where temperature fall  
529 down to 7°C (Figure S2). Moreover, the weight-specific metabolic rate, which is higher in smaller organisms  
530 (Bayne and Newell, 1983; Bougrier et al., 1995), could be exacerbated in *C. fornicata* because motile males  
531 are more active than adults through their motility (Coe, 1936; Hoagland, 1978; Walne, 1956). Together, these  
532 results explain the higher variability in their FA compositions, among individuals but also between sampling  
533 dates. They also suggest that young motile individuals of *C. fornicata*, having less energetic storage in winter  
534 while having more energetic needs, are probably in poor energetic condition during this period.  
535

536 As we measured neutral FA in digestive gland and gonad simultaneously (because the digestive  
537 gland cannot be isolated from the gonad), the level of lipid storage and FA composition may also depend on  
538 their sexual development stage. Indeed, females allocate more energy than males in the reproduction due to  
539 maternal gametogenesis (Deslous-Paoli and Héral, 1986; Leroy et al., 2013). As an illustration of FA  
540 composition changes, the n-3/n-6 ratio increased over time for both sessile and motile males whereas it  
541 remains unchanged in females. This may be linked to a preferential allocation of n-3 to early embryos, which  
542 showed an increase over the reproductive period of the slipper limpet (Leroy et al., 2013).

543 Finally, we found a surprisingly high amount of non-methylene interrupted (NMI) FA in neutral  
544 lipids (5-10 % on average in sessile stages) while these FA are preferentially incorporated in polar lipids  
545 (e.g., 8 % of NMI FA reported in polar lipids of *C. fornicata* by Dagorn et al. 2014). NMI FA are specific  
546 PUFA *de novo* synthesized by marine molluscs (Barnathan, 2009; Zhukova, 1991). Although their biological  
547 role and function are not well understood, the NMI FA have an unusual unsaturation pattern that confers to  
548 cell membranes a higher resistance to oxidative processes and microbial lipases than for the common PUFA.  
549 The content of NMI FA may thus represent a biochemical adapting feature of benthic organisms to their  
550 specific habitat (Barnathan, 2009). Because *C. fornicata* showed ontogenic histological changes in its foot  
551 (the largest part of the body) when becoming completely sessile (Androuin et al., 2019; Chaparro et al.,  
552 1998), high amount of such FA may act as a protection against potential negative effect of the sessility.  
553

## 553 5. Acknowledgements

554  
555 We thank the PSO and LIPIDOCEAN analytical facilities for stable isotope and fatty acid facilities,  
556 respectively (Oanez Lebeau, Antoine Bideau and Rudolph Corvaisier). We are grateful to Aline Blanchet-  
557 Aurigny for commenting upon preliminary versions of this manuscript. We also thank the LEBCO diving  
558 team (Amélia Curd, Xavier Caisey and Aurélien Tancray) for providing biological samples. TA was funded

559 by an IFREMER, LabexMER and Region Bretagne PhD grant. This work was funded by the TOTAL  
560 foundation for biodiversity.

561

## 562 6. References

563

564 Anderson, M.J., 2001. A new method for non-parametric multivariate analysis of variance. *Austral Ecology*  
565 26, 32–46. <https://doi.org/10.1111/j.1442-9993.2001.01070.pp.x>

566 Androuin, T., Dubois, S.F., Decottignies, P., Pelleter, E., Carlier, A., 2019. The dark side of soft tissues:  
567 Unexpected inorganic carbonate in the invasive slipper limpet *Crepidula fornicata* and its  
568 implications for stable isotope interpretations. *Rapid Commun Mass Spectrom* 33, 107–115.  
569 <https://doi.org/10.1002/rcm.8322>

570 Androuin, T., Polerecky, L., Decottignies, P., Dubois, S.F., Dupuy, C., Hubas, C., Jesus, B., Le Gall, E.,  
571 Marzloff, M.P., Carlier, A., 2018. Subtidal microphytobenthos: a secret garden stimulated by the  
572 engineer species *Crepidula fornicata*. *Front. Mar. Sci.* 5, 475.  
573 <https://doi.org/10.3389/fmars.2018.00475>

574 Arbach Leloup, F., Desroy, N., Le Mao, P., Pauly, D., Le Pape, O., 2008. Interactions between a natural food  
575 web, shellfish farming and exotic species: The case of the Bay of Mont Saint Michel (France).  
576 *Estuarine, Coastal and Shelf Science* 76, 111–120. <https://doi.org/10.1016/j.ecss.2007.06.011>

577 Arzul, G., 2001. Effect of marine animal excretions on differential growth of phytoplankton species. *ICES*  
578 *Journal of Marine Science* 58, 386–390. <https://doi.org/10.1006/jmsc.2000.1038>

579 Bachok, Z., Mfilinge, P.L., Tsuchiya, M., 2003. The diet of the mud clam *Geloina coxans* (Mollusca,  
580 Bivalvia) as indicated by fatty acid markers in a subtropical mangrove forest of Okinawa, Japan.  
581 *Journal of Experimental Marine Biology and Ecology* 292, 187–197. [https://doi.org/10.1016/S0022-0981\(03\)00160-6](https://doi.org/10.1016/S0022-0981(03)00160-6)

583 Barbier, P., Meziane, T., Forêt, M., Tremblay, R., Robert, R., Olivier, F., 2017. Nursery function of coastal  
584 temperate benthic habitats: New insight from the bivalve recruitment perspective. *Journal of Sea*  
585 *Research* 121, 11–23. <https://doi.org/10.1016/j.seares.2016.12.007>

586 Barillé, L., Le Bris, A., Méléder, V., Launeau, P., Robin, M., Louvrou, I., Ribeiro, L., 2017. Photosynthetic  
587 epibionts and endobionts of Pacific oyster shells from oyster reefs in rocky versus mudflat shores.  
588 *PLoS ONE* 12, e0185187. <https://doi.org/10.1371/journal.pone.0185187>

589 Barnathan, G., 2009. Non-methylene-interrupted fatty acids from marine invertebrates: Occurrence,  
590 characterization and biological properties. *Biochimie* 91, 671–678.  
591 <https://doi.org/10.1016/j.biochi.2009.03.020>

592 Barranguet, C., Herman, P.M.J., Sinke, J.J., 1997. Microphytobenthos biomass and community composition  
593 studied by pigment biomarkers: importance and fate in the carbon cycle of a tidal flat. *Journal of*  
594 *Sea Research* 38, 59–70. [https://doi.org/10.1016/S1385-1101\(97\)00032-4](https://doi.org/10.1016/S1385-1101(97)00032-4)

595 Bayne, B.L., Newell, R.C., 1983. Physiological energetics of marine molluscs, in: *The Mollusca*. Elsevier,  
596 pp. 407–515. <https://doi.org/10.1016/B978-0-12-751404-8.50017-7>

597 Beninger, P., Decottignies, P., Guiheneuf, F., Barillé, L., Rincé, Y., 2007. Comparison of particle processing  
598 by two introduced suspension feeders: selection in *Crepidula fornicata* and *Crassostrea gigas*. *Mar.*  
599 *Ecol. Prog. Ser.* 334, 165–177. <https://doi.org/10.3354/meps334165>

600 Beudin, A., 2014. Dynamique et échanges sédimentaires en rade de Brest impactés par l'invasion de la  
601 crépidule. Université de Bretagne Occidentale.

602 Blanchard, M., 1997. Spread of the slipper limpet *Crepidula fornicata* (L. 1758) in Europe. Current state and  
603 consequences. *Scientia Marina* 61, 10.

604 Blanchard, M., Pechenik, J.A., Giudicelli, E., Connan, J.-P., Robert, R., 2008. Competition for food in the  
605 larvae of two marine molluscs, *Crepidula fornicata* and *Crassostrea gigas*. *Aquat. Living Resour.*  
606 21, 197–205. <https://doi.org/10.1051/alr:2008025>

607 Blanchet-Aurigny, A., Dubois, S., Quéré, C., Guillou, M., Pernet, F., 2015. Trophic niche of two co-occurring  
608 ophiuroid species in impacted coastal systems, derived from fatty acid and stable isotope analyses.  
609 *Mar. Ecol. Prog. Ser.* 525, 127–141. <https://doi.org/10.3354/meps11169>

610 Blanchet-Aurigny, A., Guillou, M., Pernet, F., Gaffet, J.-D., Dubois, S.F., 2012. Tissue-diet discrimination  
611 factors of isotopic ratios ( $\Delta\delta^{13}\text{C}$  and  $\Delta\delta^{15}\text{N}$ ) in two brittle star species: Effect of reproductive state,  
612 diet and tissue composition. *Journal of Experimental Marine Biology and Ecology* 426–427, 68–77.  
613 <https://doi.org/10.1016/j.jembe.2012.05.013>

- 614 Bougrier, S., Geairon, P., Deslous-Paoli, J.M., Bacher, C., Jonquière, G., 1995. Allometric relationships and  
615 effects of temperature on clearance and oxygen consumption rates of *Crassostrea gigas* (Thunberg).  
616 Aquaculture 134, 143–154. [https://doi.org/10.1016/0044-8486\(95\)00036-2](https://doi.org/10.1016/0044-8486(95)00036-2)
- 617 Breton, G., Huriez, L., 2010. Les crépidules *Crepidula fornicata* (Linnaeus 1758) peuvent temporairement  
618 redevenir brouteuses à l'âge adulte. Bulletin de la Société Linnéenne de Normandie 120, 98–104.
- 619 Brotas, V., Plante-Cuny, M., 1998. Spatial and temporal patterns of microphytobenthic taxa of estuarine tidal  
620 flats in the Tagus Estuary (Portugal) using pigment analysis by HPLC. Mar. Ecol. Prog. Ser. 171,  
621 43–57. <https://doi.org/10.3354/meps171043>
- 622 Brotas, V., Plante-Cuny, M.-R., 2003. The use of HPLC pigment analysis to study microphytobenthos  
623 communities. Acta Oecologica 24, S109–S115. [https://doi.org/10.1016/S1146-609X\(03\)00013-4](https://doi.org/10.1016/S1146-609X(03)00013-4)
- 624 Budge, S.M., Parrish, C.C., 1998. Lipid biogeochemistry of plankton, settling matter and sediments in Trinity  
625 Bay, Newfoundland. II. Fatty acids. Organic Geochemistry 29, 1547–1559.  
626 [https://doi.org/10.1016/S0146-6380\(98\)00177-6](https://doi.org/10.1016/S0146-6380(98)00177-6)
- 627 Canuel, E.A., 2001. Relations between river flow, primary production and fatty acid composition of  
628 particulate organic matter in San Francisco and Chesapeake Bays: a multivariate approach. Organic  
629 Geochemistry 32, 563–583.
- 630 Cartaxana, P., Jesus, B., Brotas, V., 2003. Pheophorbide and pheophytin *a*-like pigments as useful markers  
631 for intertidal microphytobenthos grazing by *Hydrobia ulvae*. Estuarine, Coastal and Shelf Science  
632 58, 293–297. [https://doi.org/10.1016/S0272-7714\(03\)00081-7](https://doi.org/10.1016/S0272-7714(03)00081-7)
- 633 Cartaxana, P., Mendes, C.R., van Leeuwe, M.A., Brotas, V., 2006. Comparative study on microphytobenthic  
634 pigments of muddy and sandy intertidal sediments of the Tagus estuary. Estuarine, Coastal and Shelf  
635 Science 66, 225–230. <https://doi.org/10.1016/j.ecss.2005.08.011>
- 636 Caut, S., Angulo, E., Courchamp, F., 2009. Variation in discrimination factors ( $\Delta^{15}\text{N}$  and  $\Delta^{13}\text{C}$ ): the effect of  
637 diet isotopic values and applications for diet reconstruction. Journal of Applied Ecology 46, 443–  
638 453. <https://doi.org/10.1111/j.1365-2664.2009.01620.x>
- 639 Chaparro, O., Thompson, R., Pereda, S., 2002. Feeding mechanisms in the gastropod *Crepidula fecunda*.  
640 Mar. Ecol. Prog. Ser. 234, 171–181. <https://doi.org/10.3354/meps234171>
- 641 Chaparro, O.R., Bahamondes-Rojas, I., Vergara, A.M., Rivera, A.A., 1998. Histological characteristics of  
642 the foot and locomotory activity of *Crepidula dilatata* Lamarck (Gastropoda: Calyptraeidae) in  
643 relation to sex changes. Journal of Experimental Marine Biology and Ecology 223, 77–91.  
644 [https://doi.org/10.1016/S0022-0981\(97\)00151-2](https://doi.org/10.1016/S0022-0981(97)00151-2)
- 645 Chatterjee, A., Klein, C., Naegelen, A., Claquin, P., Masson, A., Legoff, M., Amice, E., L'Helguen, S.,  
646 Chauvaud, L., Leynaert, A., 2013. Comparative dynamics of pelagic and benthic micro-algae in a  
647 coastal ecosystem. Estuarine, Coastal and Shelf Science 133, 67–77.  
648 <https://doi.org/10.1016/j.ecss.2013.08.015>
- 649 Chauvaud, L., Jean, F., Ragueneau, O., Thouzeau, G., 2000. Long-term variation of the Bay of Brest  
650 ecosystem: benthic-pelagic coupling revisited. Mar. Ecol. Prog. Ser. 200, 35–48.  
651 <https://doi.org/10.3354/meps200035>
- 652 Chu, F.-L.E., Greaves, J., 1991. Metabolism of palmitic, linoleic, and linolenic acids in adult oysters,  
653 *Crassostrea virginica*. Mar. Biol. 110, 229–236. <https://doi.org/10.1007/BF01313708>
- 654 Cifuentes, L.A., Fogel, M.L., Pennock, J.R., Sharp, J.H., 1989. Biogeochemical factors that influence the  
655 stable nitrogen isotope ratio of dissolved ammonium in the Delaware Estuary. Geochimica et  
656 Cosmochimica Acta 53, 2713–2721. [https://doi.org/10.1016/0016-7037\(89\)90142-7](https://doi.org/10.1016/0016-7037(89)90142-7)
- 657 Coe, W.R., 1936. Sexual phases in *Crepidula*. J. Exp. Zool. 72, 455–477.  
658 <https://doi.org/10.1002/jez.1400720306>
- 659 Connelly, T., McClelland, J., Crump, B., Kellogg, C., Dunton, K., 2015. Seasonal changes in quantity and  
660 composition of suspended particulate organic matter in lagoons of the Alaskan Beaufort Sea. Mar.  
661 Ecol. Prog. Ser. 527, 31–45. <https://doi.org/10.3354/meps11207>
- 662 Connelly, T.L., Businski, T.N., Deibel, D., Parrish, C.C., Trela, P., 2016. Annual cycle and spatial trends in  
663 fatty acid composition of suspended particulate organic matter across the Beaufort Sea shelf.  
664 Estuarine, Coastal and Shelf Science 181, 170–181. <https://doi.org/10.1016/j.ecss.2016.08.016>
- 665 Correia, A.D., Costa, M.H., Luis, O.J., Livingstone, D.R., 2003. Age-related changes in antioxidant enzyme  
666 activities, fatty acid composition and lipid peroxidation in whole body *Gammarus locusta*  
667 (Crustacea: Amphipoda). Journal of Experimental Marine Biology and Ecology 289, 83–101.  
668 [https://doi.org/10.1016/S0022-0981\(03\)00040-6](https://doi.org/10.1016/S0022-0981(03)00040-6)



- 669 Cresson, P., Ruitton, S., Harmelin-Vivien, M., 2016. Feeding strategies of co-occurring suspension feeders  
670 in an oligotrophic environment. *Food Webs* 6, 19–28. <https://doi.org/10.1016/j.fooweb.2015.12.002>
- 671 Cugier, P., Struski, C., Blanchard, M., Mazurié, J., Pouvreau, S., Olivier, F., Trigui, J.R., Thiébaud, E., 2010.  
672 Assessing the role of benthic filter feeders on phytoplankton production in a shellfish farming site:  
673 Mont Saint Michel Bay, France. *Journal of Marine Systems* 82, 21–34.  
674 <https://doi.org/10.1016/j.jmarsys.2010.02.013>
- 675 Dagorn, F., Buzin, F., Couzinet-Mossion, A., Decottignies, P., Viau, M., Rabesaotra, V., Barnathan, G.,  
676 Wielgosz-Collin, G., 2014. Multiple beneficial lipids including lecithin detected in the edible  
677 invasive mollusk *Crepidula fornicata* from the French Northeastern Atlantic coast. *Marine Drugs*  
678 12, 6254–6268. <https://doi.org/10.3390/md12126254>
- 679 Dalsgaard, J., St. John, M., Kattner, G., Müller-Navarra, D., Hagen, W., 2003. Fatty acid trophic markers in  
680 the pelagic marine environment. *Advances in Marine Biology* 46, 225–340.  
681 [https://doi.org/10.1016/S0065-2881\(03\)46005-7](https://doi.org/10.1016/S0065-2881(03)46005-7)
- 682 de Montaudouin, X., Accolla, C., 2018. Intraspecific trade-offs between facilitation and competition in the  
683 invasive mollusc *Crepidula fornicata*. *Mar. Ecol. Prog. Ser.* 604, 163–171.  
684 <https://doi.org/10.3354/meps12726>
- 685 Decottignies, P., Beninger, P., Rincé, Y., Robins, R., Riera, P., 2007. Exploitation of natural food sources by  
686 two sympatric, invasive suspension-feeders: *Crassostrea gigas* and *Crepidula fornicata*. *Mar. Ecol.*  
687 *Prog. Ser.* 334, 179–192. <https://doi.org/10.3354/meps334179>
- 688 Decottignies, Priscilla, Beninger, P.G., Rincé, Y., Riera, P., 2007. Trophic interactions between two  
689 introduced suspension-feeders, *Crepidula fornicata* and *Crassostrea gigas*, are influenced by  
690 seasonal effects and qualitative selection capacity. *Journal of Experimental Marine Biology and*  
691 *Ecology* 342, 231–241. <https://doi.org/10.1016/j.jembe.2006.10.005>
- 692 DeNiro, M., Epstein, S., 1981. Influence of diet on the distribution of nitrogen isotopes in animals.  
693 *Geochimica et Cosmochimica Acta* 45, 341–351.
- 694 Deslous-Paoli, J., Héral, M., 1986. *Crepidula fornicata* L. (Gastéropode, Calyptraeidae) dans le bassin de  
695 Marennes-Oléron : composition et valeur énergétique des individus et des pontes. *Oceanologica acta*  
696 9, 305–311.
- 697 Diederich, C., Bashevkin, S., Chaparro, O., Pechenik, J., 2015. Desiccation tolerance and lifting behavior in  
698 *Crepidula fornicata* (Gastropoda). *Mar. Ecol. Prog. Ser.* 528, 235–243.  
699 <https://doi.org/10.3354/meps11284>
- 700 Dubois, S., Blanchet, H., Garcia, A., Massé, M., Galois, R., Grémare, A., Charlier, K., Guillou, G., Richard,  
701 P., Savoye, N., 2014. Trophic resource use by macrozoobenthic primary consumers within a semi-  
702 enclosed coastal ecosystem: Stable isotope and fatty acid assessment. *Journal of Sea Research* 88,  
703 87–99. <https://doi.org/10.1016/j.seares.2014.01.004>
- 704 Dubois, S.F., Colombo, F., 2014. How picky can you be? Temporal variations in trophic niches of co-  
705 occurring suspension-feeding species. *Food Webs* 1, 1–9.  
706 <https://doi.org/10.1016/j.fooweb.2014.07.001>
- 707 Dunstan, G.A., Volkman, J.K., Jeffrey, S.W., Barrett, S.M., 1992. Biochemical composition of microalgae  
708 from the green algal classes Chlorophyceae and Prasinophyceae. 2. Lipid classes and fatty acids.  
709 *Journal of Experimental Marine Biology and Ecology* 161, 115–134. [https://doi.org/10.1016/0022-0981\(92\)90193-E](https://doi.org/10.1016/0022-0981(92)90193-E)
- 710
- 711 Fleurence, J., Gutbier, G., Mabeau, S., Leray, C., 1994. Fatty acids from 11 marine macroalgae of the French  
712 Brittany coast. *J Appl Phycol* 6, 527–532. <https://doi.org/10.1007/BF02182406>
- 713 Fry, B., Sherr, E.B., 1984.  $\delta^{13}\text{C}$  measurements as indicators of carbon flow in marine and freshwater  
714 ecosystems. *Contributions in Marine Science* 27, 13–47.
- 715 Guérin, L., 2004. La crépidule en rade de Brest : un modèle biologique d'espèce introduite proliférante en  
716 réponse aux fluctuations de l'environnement. Université de Bretagne Occidentale, Brest.
- 717 Haack, S.K., Garchow, H., Odelson, D.A., Forney, L.J., Klug, M.J., 1994. Accuracy, reproducibility, and  
718 interpretation of fatty acid methyl ester profiles of kodel bacterial communities. *Applied and*  
719 *Environmental Microbiology* 60, 2483–2493.
- 720 Hentschel, B.T., 1998. Intraspecific variation in  $\delta^{13}\text{C}$  indicate ontogenic diet changes in deposit-feeding  
721 polychaetes. *Ecology* 79, 1357–1370. [https://doi.org/10.1890/0012-9658\(1998\)079\[1357:IVICIO\]2.0.CO;2](https://doi.org/10.1890/0012-9658(1998)079[1357:IVICIO]2.0.CO;2)
- 722
- 723 Hoagland, K.E., 1978. Protandry and the evolution of environmentally mediated sex change: study of the  
724 Mollusca. *Malacologia* 17, 365–391.

- 725 Hubas, C., Boeuf, D., Jesus, B., Thiney, N., Bozec, Y., Jeanthon, C., 2017. A nanoscale study of carbon and  
726 nitrogen fluxes in mats of purple sulfur bacteria: Implications for carbon cycling at the surface of  
727 coastal sediments. *Front. Microbiol.* 8, 1995. <https://doi.org/10.3389/fmicb.2017.01995>
- 728 Jaschinski, S., Brepohl, D., Sommer, U., 2011. Seasonal variation in carbon sources of -mesograzers and  
729 small predators in an eelgrass community: stable isotope and fatty acid analyses. *Mar. Ecol. Prog. Ser.*  
730 431, 69–82. <https://doi.org/10.3354/meps09143>
- 731 Ke, Z., Tan, Y., Huang, L., Zhao, C., Jiang, X., 2017. Spatial distributions of  $\delta^{13}\text{C}$ ,  $\delta^{15}\text{N}$  and C/N ratios in  
732 suspended particulate organic matter of a bay under serious anthropogenic influences: Daya Bay,  
733 China. *Marine Pollution Bulletin* 114, 183–191.
- 734 Kelly, J.R., Scheibling, R.E., 2012. Fatty acids as dietary tracers in benthic food webs. *Mar. Ecol. Prog. Ser.*  
735 446, 1–22. <https://doi.org/10.3354/meps09559>
- 736 Kopp, D., Lefebvre, S., Cachera, M., Villanueva, M.C., Ernande, B., 2015. Reorganization of a marine  
737 trophic network along an inshore–offshore gradient due to stronger pelagic–benthic coupling in  
738 coastal areas. *Progress in Oceanography* 130, 157–171.  
739 <https://doi.org/10.1016/j.pocean.2014.11.001>
- 740 Langdon, C.J., Waldock, M.J., 1981. The effect of algal and artificial diets on the growth and fatty acid  
741 composition of *Crassostrea gigas* Spat. *J. Mar. Biol. Ass.* 61, 431–448.  
742 <https://doi.org/10.1017/S0025315400047056>
- 743 Lavaud, R., Artigaud, S., Le Grand, F., Donval, A., Soudant, P., Flye-Sainte-Marie, J., Strohmeier, T., Strand,  
744 Ø., Leynaert, A., Beker, B., Chatterjee, A., Jean, F., 2018. New insights into the seasonal feeding  
745 ecology of *Pecten maximus* using pigments, fatty acids and sterols analyses. *Mar. Ecol. Prog. Ser.*  
746 590, 109–129. <https://doi.org/10.3354/meps12476>
- 747 Layman, C.A., Araujo, M.S., Boucek, R., Hammerschlag-Peyer, C.M., Harrison, E., Jud, Z.R., Matich, P.,  
748 Rosenblatt, A.E., Vaudo, J.J., Yeager, L.A., Post, D.M., Bearhop, S., 2012. Applying stable isotopes  
749 to examine food-web structure: an overview of analytical tools. *Biological Reviews* 87, 545–562.  
750 <https://doi.org/10.1111/j.1469-185X.2011.00208.x>
- 751 Le Grand, F., Soudant, P., Siah, A., Tremblay, R., Marty, Y., Kraffe, E., 2014. Disseminated neoplasia in the  
752 soft-shell clam *Mya arenaria*: membrane lipid composition and functional parameters of circulating  
753 cells. *Lipids* 49, 807–818. <https://doi.org/10.1007/s11745-014-3917-4>
- 754 Lefebvre, S., Dubois, S.F., 2016. The stony road to understand isotopic enrichment and turnover rates: insight  
755 into the metabolic part. *Vie et Milieu* 66, 306–315.
- 756 Lefebvre, S., Marín Leal, J.C., Dubois, S., Orvain, F., Blin, J.-L., Bataillé, M.-P., Ourry, A., Galois, R., 2009.  
757 Seasonal dynamics of trophic relationships among co-occurring suspension-feeders in two shellfish  
758 culture dominated ecosystems. *Estuarine, Coastal and Shelf Science* 82, 415–425.  
759 <https://doi.org/10.1016/j.ecss.2009.02.002>
- 760 Leroy, F., Meziane, T., Riera, P., Comtet, T., 2013. Seasonal variations in maternal provisioning of *Crepidula*  
761 *forficata* (Gastropoda): fatty acid composition of females, embryos and larvae. *PLoS ONE* 8,  
762 e75316. <https://doi.org/10.1371/journal.pone.0075316>
- 763 Liénart, C., Savoye, N., Bozec, Y., Breton, E., Conan, P., David, V., Feunteun, E., Grangeré, K., Kerhervé,  
764 P., Lebreton, B., Lefebvre, S., L'Helguen, S., Mousseau, L., Raimbault, P., Richard, P., Riera, P.,  
765 Sauriau, P.-G., Schaal, G., Aubert, F., Aubin, S., Bichon, S., Boinet, C., Bourasseau, L., Bréret, M.,  
766 Caparros, J., Cariou, T., Charlier, K., Claquin, P., Cornille, V., Corre, A.-M., Costes, L., Crispi, O.,  
767 Crouvoisier, M., Czamanski, M., Del Amo, Y., Derriennic, H., Dindinaud, F., Durozier, M.,  
768 Hanquiez, V., Nowaczyk, A., Devesa, J., Ferreira, S., Fournier, M., Garcia, F., Garcia, N., Geslin, S.,  
769 Grossteffan, E., Gueux, A., Guillaudeau, J., Guillou, G., Joly, O., Lachaussée, N., Lafont, M.,  
770 Lamoureux, J., Lecuyer, E., Lehodey, J.-P., Lemeille, D., Leroux, C., Macé, E., Maria, E., Pineau,  
771 P., Petit, F., Pujo-Pay, M., Rimelin-Maury, P., Sultan, E., 2017. Dynamics of particulate organic  
772 matter composition in coastal systems: A spatio-temporal study at multi-systems scale. *Progress in*  
773 *Oceanography* 156, 221–239. <https://doi.org/10.1016/j.pocean.2017.03.001>
- 774 Lorrain, A., Savoye, N., Chauvaud, L., Paulet, Y.-M., Naulet, N., 2003. Decarbonation and preservation  
775 method for the analysis of organic C and N contents and stable isotope ratios of low-carbonated  
776 suspended particulate material. *Analytica Chimica Acta* 491, 125–133.  
777 [https://doi.org/10.1016/S0003-2670\(03\)00815-8](https://doi.org/10.1016/S0003-2670(03)00815-8)
- 778 Majdi, N., Hette-Tronquart, N., Auclair, E., Bec, A., Chouvelon, T., Cognie, B., Danger, M., Decottignies,  
779 P., Dessier, A., Desvillettes, C., Dubois, S., Dupuy, C., Fritsch, C., Gaucherel, C., Hedde, M., Jabot,  
780 F., Lefebvre, S., Marzloff, M.P., Pey, B., Peyrard, N., Powolny, T., Sabbadin, R., Thébault, E.,

- 781 Perga, M.-E., 2018. There's no harm in having too much: A comprehensive toolbox of methods in  
782 trophic ecology. *Food Webs* 17, e00100. <https://doi.org/10.1016/j.fooweb.2018.e00100>
- 783 Marchais, V., Schaal, G., Grall, J., Lorrain, A., Nerot, C., Richard, P., Chauvaud, L., 2013. Spatial variability  
784 of stable isotope ratios in oysters (*Crassostrea gigas*) and primary producers along an estuarine  
785 gradient (Bay of Brest, France). *Estuaries and Coasts* 36, 808–819. [https://doi.org/10.1007/s12237-](https://doi.org/10.1007/s12237-012-9584-x)  
786 [012-9584-x](https://doi.org/10.1007/s12237-012-9584-x)
- 787 Martin, S., Thouzeau, G., Chauvaud, L., Jean, F., Guérin, L., Clavier, J., 2006. Respiration, calcification, and  
788 excretion of the invasive slipper limpet, *Crepidula fornicata* L.: Implications for carbon, carbonate,  
789 and nitrogen fluxes in affected areas. *Limnol. Oceanogr.* 51, 1996–2007.  
790 <https://doi.org/10.4319/lo.2006.51.5.1996>
- 791 Martinez Arbizu, P., 2017. pairwiseAdonis: Pairwise multilevel comparison using adonis. R package version  
792 0.3.
- 793 McCutchan, J.H.J., Lewis, W.M.J., Kendall, C., McGrath, C.C., 2003. Variation in trophic shift for stable  
794 isotope ratios of carbon, nitrogen, and sulfur. *Oikos* 102, 378–390.
- 795 McGee, D., Laws, R., Cahoon, L., 2008. Live benthic diatoms from the upper continental slope: extending  
796 the limits of marine primary production. *Mar. Ecol. Prog. Ser.* 356, 103–112.  
797 <https://doi.org/10.3354/meps07280>
- 798 Meziane, T., Bodineau, L., Retiere, C., Thoumelin, G., 1997. The use of lipid markers to define sources of  
799 organic matter in sediment and food web of the intertidal salt-marsh-flat ecosystem of Mont-Saint-  
800 Michel Bay, France. *Journal of Sea Research* 38, 47–58. [https://doi.org/10.1016/S1385-](https://doi.org/10.1016/S1385-1101(97)00035-X)  
801 [1101\(97\)00035-X](https://doi.org/10.1016/S1385-1101(97)00035-X)
- 802 Mineur, F., Belsher, T., Johnson, M.P., Maggs, C.A., Verlaque, M., 2007. Experimental assessment of oyster  
803 transfers as a vector for macroalgal introductions. *Biological Conservation* 137, 237–247.  
804 <https://doi.org/10.1016/j.biocon.2007.02.001>
- 805 Montiel, Y.A., Chaparro, O.R., Segura, C.J., 2005. Changes in feeding mechanisms during early ontogeny  
806 in juveniles of *Crepidula fecunda* (Gastropoda, Calyptraeidae). *Marine Biology* 147, 1333–1342.  
807 <https://doi.org/10.1007/s00227-005-0050-1>
- 808 Mortillaro, J.M., Schaal, G., Grall, J., Nerot, C., Brind'Amour, A., Marchais, V., Perdriau, M., Le Bris, H.,  
809 2014. Comparative study of isotopic trends in two coastal ecosystems of North Biscay: A  
810 multitrophic spatial gradient approach. *Estuarine, Coastal and Shelf Science* 136, 149–156.  
811 <https://doi.org/10.1016/j.ecss.2013.11.025>
- 812 Napolitano, G.E., Pollero, R.J., Gayoso, A.M., Macdonald, B.A., Thompson, R.J., 1997. Fatty acids as  
813 trophic markers of phytoplankton blooms in the Bahía Blanca estuary (Buenos Aires, Argentina)  
814 and in Trinity Bay (Newfoundland, Canada). *Biochemical Systematics and Ecology* 25, 739–755.  
815 [https://doi.org/10.1016/S0305-1978\(97\)00053-7](https://doi.org/10.1016/S0305-1978(97)00053-7)
- 816 Navarro, J.M., Chaparro, O.R., 2002. Grazing–filtration as feeding mechanisms in motile specimens of  
817 *Crepidula fecunda* (Gastropoda: Calyptraeidae). *Journal of Experimental Marine Biology and*  
818 *Ecology* 270, 111–122. [https://doi.org/10.1016/S0022-0981\(02\)00013-8](https://doi.org/10.1016/S0022-0981(02)00013-8)
- 819 Ní Longphuirt, S., Clavier, J., Grall, J., Chauvaud, L., Le Loc'h, F., Le Berre, I., Flye-Sainte-Marie, J.,  
820 Richard, J., Leynaert, A., 2007. Primary production and spatial distribution of subtidal  
821 microphytobenthos in a temperate coastal system, the Bay of Brest, France. *Estuarine, Coastal and*  
822 *Shelf Science* 74, 367–380. <https://doi.org/10.1016/j.ecss.2007.04.025>
- 823 Parrish, C., Thompson, R., Deibel, D., 2005. Lipid classes and fatty acids in plankton and settling matter  
824 during the spring bloom in a cold ocean coastal environment. *Mar. Ecol. Prog. Ser.* 286, 57–68.  
825 <https://doi.org/10.3354/meps286057>
- 826 Passarelli, C., Hubas, C., Nicolas Segui, A., Grange, J., Meziane, T., 2012. Surface adhesion of  
827 microphytobenthic biofilms is enhanced under *Hediste diversicolor* (O.F. Müller) trophic pressure.  
828 *Journal of Experimental Marine Biology and Ecology* 438, 52–60.  
829 <https://doi.org/10.1016/j.jembe.2012.10.005>
- 830 Pernet, F., Malet, N., Pastoureaud, A., Vaquer, A., Quéré, C., Dubroca, L., 2012. Marine diatoms sustain  
831 growth of bivalves in a Mediterranean lagoon. *Journal of Sea Research* 68, 20–32.  
832 <https://doi.org/10.1016/j.seares.2011.11.004>
- 833 Pernet, F., Tremblay, R., 2004. Effect of varying levels of dietary essential fatty acid during early ontogeny  
834 of the sea scallop *Placopecten magellanicus*. *Journal of Experimental Marine Biology and Ecology*  
835 310, 73–86. <https://doi.org/10.1016/j.jembe.2004.04.001>

- 836 Pernet, F., Tremblay, R., Comeau, L., Guderley, H., 2007. Temperature adaptation in two bivalve species  
837 from different thermal habitats: energetics and remodelling of membrane lipids. *Journal of*  
838 *Experimental Biology* 210, 2999–3014. <https://doi.org/10.1242/jeb.006007>
- 839 Perry, G.J., Volkman, J.K., Johns, R.B., Bavor, H.J., 1979. Fatty acids of bacterial origin in contemporary  
840 marine sediments. *Geochimica et Cosmochimica Acta* 43, 1715–1725.  
841 [https://doi.org/10.1016/0016-7037\(79\)90020-6](https://doi.org/10.1016/0016-7037(79)90020-6)
- 842 Prins, T.C., Smaal, A.C., Dame, R.F., 1998. A review of the feedbacks between bivalve grazing and  
843 ecosystem processes. *Aquatic Ecology* 31, 349–359.
- 844 R Core Team, 2012. R: A language and environment for statistical computing.
- 845 Ragueneau, O., Chauvaud, L., Leynaert, A., Thouzeau, G., Paulet, Y.-M., Bonnet, S., Lorrain, A., Grall, J.,  
846 Corvaisier, R., Hir, M.L., Jean, F., Clavier, J., 2002. Direct evidence of a biologically active Coastal  
847 Silicate pump: ecological implications. *Limnology and Oceanography* 47, 1849–1854.
- 848 Ragueneau, O., Raimonet, M., Mazé, C., Coston-Guarini, J., Chauvaud, L., Danto, A., Grall, J., Jean, F.,  
849 Paulet, Y.-M., Thouzeau, G., 2018. The impossible sustainability of the Bay of Brest? Fifty years  
850 of ecosystem changes, Interdisciplinary knowledge construction and key questions at the science-  
851 policy-community interface. *Front. Mar. Sci.* 5. <https://doi.org/10.3389/fmars.2018.00124>
- 852 Raimonet, M., Andrieux-Loyer, F., Ragueneau, O., Michaud, E., Kerouel, R., Philippon, X., Nonent, M.,  
853 Mémerly, L., 2013. Strong gradient of benthic biogeochemical processes along a macrotidal  
854 temperate estuary: focus on P and Si cycles. *Biogeochemistry* 115, 399–417.  
855 <https://doi.org/10.1007/s10533-013-9843-3>
- 856 Riera, P., 2007. Trophic subsidies of *Crassostrea gigas*, *Mytilus edulis* and *Crepidula fornicata* in the Bay  
857 of Mont Saint Michel (France): A  $\delta^{13}\text{C}$  and  $\delta^{15}\text{N}$  investigation. *Estuarine, Coastal and Shelf Science*  
858 72, 33–41. <https://doi.org/10.1016/j.ecss.2006.10.002>
- 859 Riera, P., Stal, L., Nieuwenhuize, J., 2002.  $\delta^{13}\text{C}$  versus  $\delta^{15}\text{N}$  of co-occurring molluscs within a community  
860 dominated by *Crassostrea gigas* and *Crepidula fornicata* (Oosterschelde, The Netherlands). *Mar.*  
861 *Ecol. Prog. Ser.* 240, 291–295. <https://doi.org/10.3354/meps240291>
- 862 Rigolet, C., Thiébaud, E., Dubois, S., 2014. Food web structures of subtidal benthic muddy habitats: evidence  
863 of microphytobenthos contribution supported by an engineer species. *Mar. Ecol. Prog. Ser.* 500, 25–  
864 41. <https://doi.org/10.3354/meps10685>
- 865 Rossi, F., Herman, P.M.J., Middelburg, J.J., 2004. Interspecific and intraspecific variation of  $\delta^{13}\text{C}$  and  $\delta^{15}\text{N}$   
866 in deposit- and suspension-feeding bivalves (*Macoma balthica* and *Cerastoderma edule*): Evidence  
867 of ontogenetic changes in feeding mode of *Macoma balthica*. *Limnol. Oceanogr.* 49, 408–414.  
868 <https://doi.org/10.4319/lo.2004.49.2.0408>
- 869 Roy, S., Llewellyn, C.A., Egeland, E.S., Johnsen, G., 2011. *Phytoplankton Pigments, Characterization,*  
870 *Chemotaxonomy, and Applications in Oceanography*, Cambridge University Press. ed. Cambridge,  
871 UK.
- 872 Shumway, S.E., Ward, J.E., Heupel, E., Holohan, B.A., Heupel, J., Heupel, T., Padilla, D.K., 2014.  
873 Observations of feeding in the common Atlantic slipper snail *Crepidula fornicata* L., with special  
874 reference to the “mucus net.” *Journal of Shellfish Research* 33, 279–291.  
875 <https://doi.org/10.2983/035.033.0127>
- 876 Tremblay, R., Olivier, F., Bourget, E., Rittschof, D., 2007. Physiological condition of *Balanus amphitrite*  
877 cyprid larvae determines habitat selection success. *Mar. Ecol. Prog. Ser.* 340, 1–8.  
878 <https://doi.org/10.3354/meps340001>
- 879 Vander Zanden, M.J., Clayton, M.K., Moody, E.K., Solomon, C.T., Weidel, B.C., 2015. Stable isotope  
880 turnover and half-life in animal tissues: a literature synthesis. *PLoS ONE* 10, e0116182.  
881 <https://doi.org/10.1371/journal.pone.0116182>
- 882 Wainright, S.C., Fry, B., 1994. Seasonal variation of the stable isotopic compositions of coastal marine  
883 plankton from Woods Hole, Massachusetts and Georges Bank. *Estuaries* 17, 552.  
884 <https://doi.org/10.2307/1352403>
- 885 Walne, P.R., 1956. The biology and distribution of the slipper limpet *Crepidula fornicata* in Essex rivers.  
886 *Fishery Investigations Series II* 20, 1–50.
- 887 Yee, A.K., Padilla, D.K., 2015. Allometric scaling of the radula in the Atlantic slipper snail *Crepidula*  
888 *fornicata*. *Journal of Shellfish Research* 34, 903–907. <https://doi.org/10.2983/035.034.0320>
- 889 Zhukova, N., Aizdacher, N., 1995. Fatty acid composition of 15 species of marine microalgae.  
890 *Phytochemistry* 39, 351–356. [https://doi.org/10.1016/0031-9422\(94\)00913-E](https://doi.org/10.1016/0031-9422(94)00913-E)

- 891 Zhukova, N.V., 1991. The pathway of the biosynthesis of non-methylene-interrupted dienoic fatty acids in  
892 molluscs. *Comparative Biochemistry and Physiology Part B: Comparative Biochemistry* 100, 801–  
893 804. [https://doi.org/10.1016/0305-0491\(91\)90293-M](https://doi.org/10.1016/0305-0491(91)90293-M)  
894 Zhukova, N.V., Kharlamenko, V.I., Svetashev, V.I., Rodionov, I.A., 1992. Fatty acids as markers of bacterial  
895 symbionts of marine bivalve molluscs. *Journal of Experimental Marine Biology and Ecology* 162,  
896 253–263. [https://doi.org/10.1016/0022-0981\(92\)90205-O](https://doi.org/10.1016/0022-0981(92)90205-O)  
897

898 7. Supplementary materials

899

900 **Table S1: Pigment (% , mean  $\pm$  SD, n  $\geq$  2) composition of organic matter sources (Biofilm, suspended particulate organic matter (SPOM), superficial**  
 901 **sedimentary organic matter (SSOM)) over the sampling survey. UK: Unknown pigments.**

| Pigments                          | S1 = 26th February |                |                | S2 = 21th March |                |                 | S3 = 28th March |                |                | S4 = 12th April |                |                | S5 = 14th June |                |                |
|-----------------------------------|--------------------|----------------|----------------|-----------------|----------------|-----------------|-----------------|----------------|----------------|-----------------|----------------|----------------|----------------|----------------|----------------|
|                                   | Biofilm            | SPOM           | SSOM           | Biofilm         | SPOM           | SSOM            | Biofilm         | SPOM           | SSOM           | Biofilm         | SPOM           | SSOM           | Biofilm        | SPOM           | SSOM           |
| Alloxanthin                       | 4 $\pm$ 2.2        | 11.7 $\pm$ 1.3 | 3.9 $\pm$ 0.1  | 1.2 $\pm$ 0.8   | 7.1 $\pm$ 1.2  | 3 $\pm$ 0.8     | 1.7 $\pm$ 1     | 9.3 $\pm$ 0.3  | 3.3 $\pm$ 0.3  | 2 $\pm$ 0.2     | 5.1 $\pm$ 0.8  | 4.1 $\pm$ 0.3  | 1.7 $\pm$ 0.6  | 15.1 $\pm$ 1.3 | 2.1 $\pm$ 0.4  |
| $\beta$ caroten                   | 1.8 $\pm$ 0.6      | 0 $\pm$ 0      | 0.7 $\pm$ 0.2  | 0.2 $\pm$ 0.1   | 0.3 $\pm$ 0.2  | 0 $\pm$ 0       | 0.4 $\pm$ 0.1   | 0.6 $\pm$ 0.1  | 0 $\pm$ 0      | 1.5 $\pm$ 0.9   | 3.2 $\pm$ 3.4  | 0.1 $\pm$ 0.1  | 1.5 $\pm$ 0.5  | 2.8 $\pm$ 0.5  | 1.9 $\pm$ 1.6  |
| Chlorophyll <i>a</i>              | 4.7 $\pm$ 0.6      | 7.7 $\pm$ 1.4  | 0.8 $\pm$ 0.2  | 4.1 $\pm$ 0.4   | 6.1 $\pm$ 0.7  | 0.3 $\pm$ 0.1   | 4.1 $\pm$ 0.4   | 7.2 $\pm$ 0.1  | 0.4 $\pm$ 0.1  | 4.7 $\pm$ 0.6   | 6.3 $\pm$ 0.6  | 0.3 $\pm$ 0.1  | 5 $\pm$ 0.4    | 4.7 $\pm$ 0.1  | 0.7 $\pm$ 0.1  |
| Chlorophyll <i>b</i>              | 19.8 $\pm$ 1.7     | 7.8 $\pm$ 0.7  | 0.6 $\pm$ 0.1  | 25.8 $\pm$ 2.8  | 4.8 $\pm$ 0.5  | 0.3 $\pm$ 0.1   | 21.7 $\pm$ 0.1  | 7.1 $\pm$ 0.1  | 0.3 $\pm$ 0.1  | 19.6 $\pm$ 2.9  | 4.3 $\pm$ 0.6  | 0.2 $\pm$ 0.1  | 16 $\pm$ 0.6   | 5.1 $\pm$ 0    | 0.3 $\pm$ 0.2  |
| Chlorophyllide                    | 0.3 $\pm$ 0.1      | 0 $\pm$ 0      | 0.1 $\pm$ 0    | 0.3 $\pm$ 0.3   | 0.1 $\pm$ 0.1  | 0.1 $\pm$ 0     | 0.4 $\pm$ 0.1   | 0.2 $\pm$ 0    | 0.1 $\pm$ 0    | 0.5 $\pm$ 0.4   | 0.3 $\pm$ 0.1  | 0.1 $\pm$ 0    | 0.4 $\pm$ 0.1  | 0.2 $\pm$ 0    | 0 $\pm$ 0      |
| Diadinoxanthin                    | 0.8 $\pm$ 0.1      | 2.7 $\pm$ 0.4  | 1.1 $\pm$ 0.1  | 0.6 $\pm$ 0.1   | 3.4 $\pm$ 0.2  | 1 $\pm$ 0.1     | 0.7 $\pm$ 0.1   | 3.4 $\pm$ 0    | 0.9 $\pm$ 0.3  | 0.8 $\pm$ 0.1   | 2.1 $\pm$ 0.1  | 1.2 $\pm$ 0    | 1 $\pm$ 0      | 1.5 $\pm$ 0    | 1 $\pm$ 0.2    |
| Xanthophyll                       | 1.1 $\pm$ 0        | 2.5 $\pm$ 0.1  | 3.5 $\pm$ 0.2  | 0 $\pm$ 0       | 1.8 $\pm$ 1.6  | 2.9 $\pm$ 0.7   | 0.6 $\pm$ 0.1   | 2 $\pm$ 0.1    | 3.3 $\pm$ 0.3  | 0.7 $\pm$ 0.2   | 2.1 $\pm$ 0.2  | 3.1 $\pm$ 0.1  | 0.6 $\pm$ 0.1  | 3 $\pm$ 0.2    | 2.1 $\pm$ 0.5  |
| Fucoxanthin-like                  | 1.1 $\pm$ 0.1      | 2.7 $\pm$ 0.2  | 4.2 $\pm$ 0.4  | 1.2 $\pm$ 0.1   | 3.5 $\pm$ 0.1  | 5.6 $\pm$ 0.8   | 1.4 $\pm$ 0.4   | 4 $\pm$ 0.3    | 5.1 $\pm$ 0.2  | 2.8 $\pm$ 1.9   | 3 $\pm$ 0.1    | 5.7 $\pm$ 0.6  | 1.7 $\pm$ 0.2  | 3.1 $\pm$ 0.1  | 4.5 $\pm$ 0.5  |
| Fucoxanthin                       | 12.5 $\pm$ 2.8     | 22.5 $\pm$ 1.8 | 5.8 $\pm$ 0.9  | 10.8 $\pm$ 2.4  | 21.5 $\pm$ 1.4 | 5 $\pm$ 1.2     | 12.2 $\pm$ 3.4  | 19.2 $\pm$ 0.1 | 6.1 $\pm$ 1.3  | 12.3 $\pm$ 1.3  | 22.1 $\pm$ 0.9 | 6.8 $\pm$ 0.3  | 16.1 $\pm$ 2.3 | 11.3 $\pm$ 0.1 | 4.3 $\pm$ 1.1  |
| Pheophorbide                      | 14.8 $\pm$ 1.2     | 20 $\pm$ 2.7   | 32.8 $\pm$ 1.7 | 6.7 $\pm$ 2.4   | 23.7 $\pm$ 3   | 25.3 $\pm$ 1.6  | 8.8 $\pm$ 1.2   | 15.8 $\pm$ 0.5 | 26.9 $\pm$ 1.4 | 13.2 $\pm$ 3.4  | 22.3 $\pm$ 1.7 | 24.3 $\pm$ 0.6 | 12 $\pm$ 1.1   | 18.8 $\pm$ 2.8 | 20.8 $\pm$ 1.1 |
| Lutein                            | 3 $\pm$ 0.1        | 8.5 $\pm$ 0.8  | 13.9 $\pm$ 1.6 | 1.5 $\pm$ 0.5   | 7.5 $\pm$ 0.7  | 11.8 $\pm$ 2.3  | 2.2 $\pm$ 0.3   | 2.9 $\pm$ 0.4  | 10.6 $\pm$ 1   | 1.2 $\pm$ 0.3   | 4.3 $\pm$ 0.6  | 8.3 $\pm$ 1.6  | 1 $\pm$ 0.1    | 2 $\pm$ 0      | 3.8 $\pm$ 1.5  |
| Neoxanthin                        | 7.7 $\pm$ 1.2      | 1.7 $\pm$ 0.2  | 0 $\pm$ 0      | 14.8 $\pm$ 0.7  | 2.7 $\pm$ 0.4  | 0 $\pm$ 0       | 12.9 $\pm$ 0.5  | 5.1 $\pm$ 0.2  | 0 $\pm$ 0      | 6.1 $\pm$ 4.3   | 2.1 $\pm$ 0.1  | 2.9 $\pm$ 0.1  | 7.2 $\pm$ 0.9  | 2 $\pm$ 0.2    | 0.7 $\pm$ 1.2  |
| Pheophytin                        | 4.1 $\pm$ 3.3      | 0 $\pm$ 0      | 23.2 $\pm$ 1.1 | 1 $\pm$ 0.7     | 0.8 $\pm$ 1.4  | 32.9 $\pm$ 2.4  | 2.9 $\pm$ 0.6   | 1.3 $\pm$ 0.1  | 31.1 $\pm$ 1.8 | 7.9 $\pm$ 1.4   | 9.5 $\pm$ 5.8  | 30.1 $\pm$ 1.9 | 15 $\pm$ 1.5   | 17.9 $\pm$ 1.8 | 51.4 $\pm$ 2.6 |
| Chlorophyll <i>c</i>              | 1.5 $\pm$ 0.5      | 4.8 $\pm$ 0.5  | 3.7 $\pm$ 0.2  | 0 $\pm$ 0       | 12.5 $\pm$ 1.5 | 6.4 $\pm$ 0.2   | 1.3 $\pm$ 0.2   | 15.2 $\pm$ 0.1 | 7.2 $\pm$ 0.7  | 1.3 $\pm$ 0.3   | 6.6 $\pm$ 1    | 8 $\pm$ 1.4    | 1.9 $\pm$ 0.1  | 4.1 $\pm$ 0.3  | 3.9 $\pm$ 0.4  |
| UK 3                              | 1.1 $\pm$ 0.3      | 0.9 $\pm$ 0    | 0.8 $\pm$ 0.1  | 1.6 $\pm$ 0.2   | 0.9 $\pm$ 0.4  | 0.7 $\pm$ 0.1   | 1.1 $\pm$ 0     | 1.6 $\pm$ 0.1  | 0.6 $\pm$ 0    | 1.1 $\pm$ 0.3   | 0.7 $\pm$ 0.4  | 1 $\pm$ 0.2    | 0.7 $\pm$ 0    | 0.7 $\pm$ 0.2  | 0.4 $\pm$ 0.1  |
| UK 6                              | 17.3 $\pm$ 1.3     | 0 $\pm$ 0      | 0 $\pm$ 0      | 26.7 $\pm$ 4.5  | 0 $\pm$ 0      | 0 $\pm$ 0       | 23 $\pm$ 1.3    | 0 $\pm$ 0      | 0 $\pm$ 0      | 20.4 $\pm$ 3.8  | 0 $\pm$ 0      | 0 $\pm$ 0      | 14.5 $\pm$ 0.9 | 0 $\pm$ 0      | 0 $\pm$ 0      |
| UK 7                              | 1.2 $\pm$ 0.1      | 0 $\pm$ 0      | 0 $\pm$ 0      | 1.7 $\pm$ 0.1   | 0 $\pm$ 0      | 0 $\pm$ 0       | 1.1 $\pm$ 0.3   | 0 $\pm$ 0      | 0 $\pm$ 0      | 1.6 $\pm$ 0.1   | 0 $\pm$ 0      | 0 $\pm$ 0      | 0.9 $\pm$ 0    | 0 $\pm$ 0      | 0 $\pm$ 0      |
| UK 8                              | 0.6 $\pm$ 0.1      | 0 $\pm$ 0      | 0 $\pm$ 0      | 1.1 $\pm$ 0.6   | 0 $\pm$ 0      | 0 $\pm$ 0       | 1 $\pm$ 0.8     | 0 $\pm$ 0      | 0 $\pm$ 0      | 0.7 $\pm$ 0.6   | 0 $\pm$ 0      | 0 $\pm$ 0      | 1.3 $\pm$ 0.5  | 0 $\pm$ 0      | 0 $\pm$ 0      |
| UK 9                              | 0 $\pm$ 0          | 0 $\pm$ 0      | 0 $\pm$ 0      | 0 $\pm$ 0       | 0 $\pm$ 0      | 0 $\pm$ 0       | 0 $\pm$ 0       | 0 $\pm$ 0      | 0 $\pm$ 0      | 0 $\pm$ 0       | 0.8 $\pm$ 0.3  | 0 $\pm$ 0      | 0 $\pm$ 0      | 0.8 $\pm$ 0    | 0.2 $\pm$ 0.2  |
| Violaxanthin                      | 0.6 $\pm$ 0.2      | 1.3 $\pm$ 0.3  | 0 $\pm$ 0      | 0 $\pm$ 0       | 0.7 $\pm$ 0.7  | 0 $\pm$ 0       | 0.9 $\pm$ 0.1   | 3.3 $\pm$ 0.4  | 0 $\pm$ 0      | 0.3 $\pm$ 0.5   | 1.8 $\pm$ 1.7  | 0 $\pm$ 0      | 0.2 $\pm$ 0.4  | 4.5 $\pm$ 0.1  | 0 $\pm$ 0      |
| Zeaxanthin                        | 2 $\pm$ 0.1        | 5.2 $\pm$ 0.2  | 5 $\pm$ 0.5    | 0.8 $\pm$ 0.4   | 2.5 $\pm$ 0.4  | 4.8 $\pm$ 1.1   | 1.6 $\pm$ 0     | 1.7 $\pm$ 0.1  | 4.2 $\pm$ 0.3  | 1.1 $\pm$ 0     | 3.2 $\pm$ 0.3  | 3.7 $\pm$ 0.6  | 0.9 $\pm$ 0.1  | 2.3 $\pm$ 0.1  | 1.9 $\pm$ 0.6  |
| Chl <i>c</i> / Chl <i>a</i> ratio | 0.3 $\pm$ 0.1      | 0.6 $\pm$ 0.2  | 4.5 $\pm$ 0.7  | 0 $\pm$ 0       | 2.1 $\pm$ 0.5  | 27.3 $\pm$ 17.1 | 0.3 $\pm$ 0.1   | 2.1 $\pm$ 0    | 17.1 $\pm$ 1.2 | 0.3 $\pm$ 0.1   | 1.1 $\pm$ 0.1  | 28 $\pm$ 14.9  | 0.4 $\pm$ 0.1  | 0.9 $\pm$ 0    | 5.8 $\pm$ 1.1  |
| Chl <i>b</i> / Chl <i>a</i> ratio | 4.2 $\pm$ 0.2      | 1 $\pm$ 0.1    | 0.7 $\pm$ 0.1  | 6.3 $\pm$ 0.7   | 0.8 $\pm$ 0    | 1.2 $\pm$ 0.5   | 5.3 $\pm$ 0.5   | 1 $\pm$ 0      | 0.7 $\pm$ 0.2  | 4.2 $\pm$ 0.6   | 0.7 $\pm$ 0    | 0.6 $\pm$ 0    | 3.2 $\pm$ 0.4  | 1.1 $\pm$ 0    | 0.5 $\pm$ 0.3  |
| Fuco / Chl <i>a</i> ratio         | 2.6 $\pm$ 0.3      | 3 $\pm$ 0.8    | 7 $\pm$ 1.7    | 2.6 $\pm$ 0.6   | 3.6 $\pm$ 0.6  | 19.3 $\pm$ 6.7  | 2.9 $\pm$ 0.6   | 2.7 $\pm$ 0    | 14.5 $\pm$ 3.2 | 2.7 $\pm$ 0.5   | 3.5 $\pm$ 0.4  | 23 $\pm$ 9.8   | 3.2 $\pm$ 0.2  | 2.4 $\pm$ 0.1  | 6.3 $\pm$ 1.4  |

902 **Table S2: Fatty acid (FA) (% , mean  $\pm$  SD, n = 3) composition of organic matter sources (Biofilm, suspended particulate organic matter (SPOM), superficial**  
903 **sedimentary organic matter (SSOM)) over the sampling survey. Only FA accounting for more than 0.5 % of total FA in at least one sample was shown.**  
904 **BFA: Branched FA; SFA: saturated FA; MUFA: monounsaturated FA; PUFA: polyunsaturated FA; UK FA: Unknown FA; EPA: 20:5n-3; DHA: 22:6n-**  
905 **3.**

| Fatty acids  | S1 = 26 <sup>th</sup> February |                |                | S2 = 21 <sup>th</sup> March |                |                | S3 = 28 <sup>th</sup> March |                |                | S4 = 12 <sup>th</sup> April |                |                | S5 = 14 <sup>th</sup> June |                |                |
|--------------|--------------------------------|----------------|----------------|-----------------------------|----------------|----------------|-----------------------------|----------------|----------------|-----------------------------|----------------|----------------|----------------------------|----------------|----------------|
|              | Biofilm                        | SPOM           | SSOM           | Biofilm                     | SPOM           | SSOM           | Biofilm                     | SPOM           | SSOM           | Biofilm                     | SPOM           | SSOM           | Biofilm                    | SPOM           | SSOM           |
| TMTD         | 0.1 $\pm$ 0.1                  | 0 $\pm$ 0      | 0 $\pm$ 0      | 0.1 $\pm$ 0.1               | 0.4 $\pm$ 0    | 0.6 $\pm$ 0    | 0.1 $\pm$ 0.1               | 0 $\pm$ 0      | 0.2 $\pm$ 0.2  | 0 $\pm$ 0                   | 0 $\pm$ 0      | 0.3 $\pm$ 0    | 0 $\pm$ 0                  | 0 $\pm$ 0      | 0 $\pm$ 0      |
| 15:0iso      | 1.8 $\pm$ 0.7                  | 1 $\pm$ 0.2    | 2.7 $\pm$ 0.4  | 0.6 $\pm$ 0.5               | 1 $\pm$ 0.1    | 1.9 $\pm$ 0.8  | 1.3 $\pm$ 0.9               | 1.1 $\pm$ 0.1  | 2 $\pm$ 0.1    | 1.2 $\pm$ 0.4               | 1.3 $\pm$ 0.2  | 2.5 $\pm$ 0.2  | 1.4 $\pm$ 0.3              | 1 $\pm$ 0.2    | 2 $\pm$ 0.2    |
| 15:0ant      | 0.6 $\pm$ 0.1                  | 1.2 $\pm$ 0.1  | 3.7 $\pm$ 0.7  | 0.3 $\pm$ 0.1               | 0.9 $\pm$ 0.1  | 2.9 $\pm$ 0.6  | 0.8 $\pm$ 0.2               | 1 $\pm$ 0.1    | 3 $\pm$ 0.4    | 0.5 $\pm$ 0.2               | 1.1 $\pm$ 0.2  | 3.2 $\pm$ 0.3  | 0.2 $\pm$ 0.2              | 0.4 $\pm$ 0.3  | 2.3 $\pm$ 0.8  |
| 16:0iso      | 0.8 $\pm$ 0.2                  | 0.9 $\pm$ 0.2  | 2.3 $\pm$ 0.4  | 0.2 $\pm$ 0                 | 0.5 $\pm$ 0    | 0.9 $\pm$ 0.1  | 0.6 $\pm$ 0.2               | 0.5 $\pm$ 0    | 0.8 $\pm$ 0.2  | 0.5 $\pm$ 0.2               | 0.5 $\pm$ 0.1  | 0.9 $\pm$ 0.1  | 0.6 $\pm$ 0.1              | 0.2 $\pm$ 0.1  | 0.5 $\pm$ 0.4  |
| 17:0iso      | 0.9 $\pm$ 0.3                  | 1.7 $\pm$ 0.2  | 1.4 $\pm$ 0.2  | 0.1 $\pm$ 0.1               | 0.3 $\pm$ 0.1  | 1.2 $\pm$ 0.1  | 0.5 $\pm$ 0.4               | 2.8 $\pm$ 0.1  | 1.2 $\pm$ 0.1  | 0.8 $\pm$ 0.5               | 2.7 $\pm$ 0.2  | 1.6 $\pm$ 0.1  | 1.8 $\pm$ 0.6              | 0.8 $\pm$ 0.5  | 0.7 $\pm$ 0.6  |
| 17:0ant      | 2.5 $\pm$ 2.4                  | 0.3 $\pm$ 0.3  | 0.9 $\pm$ 0.1  | 0.9 $\pm$ 0.6               | 1.2 $\pm$ 0    | 1.1 $\pm$ 0.1  | 2.6 $\pm$ 0.8               | 0 $\pm$ 0      | 0.6 $\pm$ 0    | 1.6 $\pm$ 0.5               | 0 $\pm$ 0      | 0.2 $\pm$ 0.2  | 1.2 $\pm$ 0.2              | 0.6 $\pm$ 0.1  | 0.9 $\pm$ 0.8  |
| 18:0iso      | 0.1 $\pm$ 0.1                  | 1.2 $\pm$ 0.9  | 1.1 $\pm$ 0.2  | 0.1 $\pm$ 0.1               | 0.4 $\pm$ 0    | 0.6 $\pm$ 0.1  | 1.1 $\pm$ 0.1               | 0.9 $\pm$ 0.2  | 0.4 $\pm$ 0.1  | 0.4 $\pm$ 0.3               | 0.9 $\pm$ 0.3  | 0.6 $\pm$ 0.1  | 1.7 $\pm$ 0.4              | 1.2 $\pm$ 0    | 1.7 $\pm$ 0.4  |
| $\Sigma$ BFA | 6.8 $\pm$ 2.4                  | 6.3 $\pm$ 0.3  | 12.1 $\pm$ 1.4 | 2.2 $\pm$ 0.2               | 4.4 $\pm$ 0.1  | 8.5 $\pm$ 1.6  | 6.8 $\pm$ 0.7               | 6.2 $\pm$ 0.4  | 8 $\pm$ 0.7    | 5 $\pm$ 1.3                 | 6.6 $\pm$ 0.9  | 9 $\pm$ 0.4    | 7 $\pm$ 0.6                | 4.2 $\pm$ 0.3  | 8.1 $\pm$ 1.5  |
| 14:0         | 3.1 $\pm$ 0.3                  | 7.3 $\pm$ 1.3  | 4.9 $\pm$ 0.8  | 1.5 $\pm$ 0.4               | 5.2 $\pm$ 0.5  | 3.5 $\pm$ 0    | 4.2 $\pm$ 0.6               | 12 $\pm$ 0.8   | 4.1 $\pm$ 0.2  | 6.1 $\pm$ 2.1               | 8.6 $\pm$ 1    | 4.1 $\pm$ 0.3  | 4.9 $\pm$ 0.2              | 5.4 $\pm$ 1.1  | 5.3 $\pm$ 0.6  |
| 15:0         | 0.9 $\pm$ 0.3                  | 2.6 $\pm$ 0.4  | 1.5 $\pm$ 0.2  | 0.2 $\pm$ 0.1               | 1.9 $\pm$ 0.1  | 1.2 $\pm$ 0.1  | 0.9 $\pm$ 0.2               | 1.7 $\pm$ 0.1  | 1 $\pm$ 0.1    | 0.8 $\pm$ 0.1               | 1.4 $\pm$ 0.2  | 1.2 $\pm$ 0.1  | 0.7 $\pm$ 0.1              | 0.8 $\pm$ 0.2  | 0.7 $\pm$ 0.6  |
| 16:0         | 21.5 $\pm$ 3.4                 | 33 $\pm$ 4.9   | 22.4 $\pm$ 3.1 | 38.6 $\pm$ 0.7              | 26.3 $\pm$ 2.3 | 17.6 $\pm$ 1.6 | 29.5 $\pm$ 4.3              | 32.7 $\pm$ 1.9 | 14.8 $\pm$ 1.4 | 30.5 $\pm$ 4.4              | 34.1 $\pm$ 2.3 | 18.2 $\pm$ 0.2 | 19.9 $\pm$ 4.6             | 25 $\pm$ 4.7   | 19.3 $\pm$ 4.3 |
| 17:0         | 1.6 $\pm$ 0.7                  | 1.6 $\pm$ 0.3  | 1.3 $\pm$ 0.2  | 0.8 $\pm$ 0.8               | 0.7 $\pm$ 0    | 0.9 $\pm$ 0.1  | 0.8 $\pm$ 0.2               | 0.9 $\pm$ 0.1  | 0.8 $\pm$ 0.1  | 0.7 $\pm$ 0.1               | 0.9 $\pm$ 0.1  | 1 $\pm$ 0.1    | 1.6 $\pm$ 0.4              | 0.2 $\pm$ 0.2  | 1.8 $\pm$ 0.5  |
| 18:0         | 16.5 $\pm$ 1.3                 | 11.8 $\pm$ 1.7 | 9.6 $\pm$ 1.3  | 42.3 $\pm$ 2.6              | 13.3 $\pm$ 1.4 | 10.9 $\pm$ 2.5 | 21.5 $\pm$ 4.8              | 9.2 $\pm$ 0.7  | 6.8 $\pm$ 1    | 21.9 $\pm$ 3.8              | 14.9 $\pm$ 5.3 | 7.6 $\pm$ 0.3  | 6.7 $\pm$ 2.5              | 6.5 $\pm$ 1.3  | 8 $\pm$ 2.1    |
| 20:0         | 0.6 $\pm$ 0.1                  | 1.7 $\pm$ 0.1  | 1.9 $\pm$ 1.7  | 0.6 $\pm$ 0                 | 1.3 $\pm$ 0    | 2.8 $\pm$ 0.3  | 0.8 $\pm$ 0.2               | 0.9 $\pm$ 0    | 2.6 $\pm$ 0.3  | 0.9 $\pm$ 0.1               | 0.4 $\pm$ 0.7  | 3 $\pm$ 0.2    | 1.1 $\pm$ 0.7              | 0.9 $\pm$ 0.2  | 2.2 $\pm$ 0.3  |
| 22:0         | 1 $\pm$ 0.1                    | 1.4 $\pm$ 1.2  | 3.2 $\pm$ 3    | 0.3 $\pm$ 0.2               | 1.6 $\pm$ 0    | 4.4 $\pm$ 0.7  | 1.1 $\pm$ 0.3               | 0.7 $\pm$ 0.6  | 4.5 $\pm$ 0.5  | 1.4 $\pm$ 0.4               | 1.4 $\pm$ 0.3  | 5.4 $\pm$ 0.3  | 1.2 $\pm$ 0.9              | 0.7 $\pm$ 0.1  | 3.5 $\pm$ 0.8  |
| 24:0         | 0.1 $\pm$ 0                    | 0 $\pm$ 0      | 0.5 $\pm$ 0.4  | 0 $\pm$ 0                   | 0 $\pm$ 0      | 0.1 $\pm$ 0.3  | 0.7 $\pm$ 0.3               | 4.4 $\pm$ 2    | 6.1 $\pm$ 5.2  | 0.1 $\pm$ 0.1               | 0.1 $\pm$ 0.2  | 0.3 $\pm$ 0.3  | 1.9 $\pm$ 1.5              | 1.1 $\pm$ 0.2  | 4.9 $\pm$ 1.2  |
| $\Sigma$ SFA | 45.3 $\pm$ 4.7                 | 59.4 $\pm$ 7.6 | 45.4 $\pm$ 3.3 | 84.2 $\pm$ 2.1              | 50.3 $\pm$ 3.8 | 41.4 $\pm$ 3.2 | 59.6 $\pm$ 9.9              | 62.4 $\pm$ 1.1 | 40.7 $\pm$ 7.3 | 62.3 $\pm$ 7.4              | 61.8 $\pm$ 5.9 | 40.7 $\pm$ 0.5 | 38.1 $\pm$ 10              | 40.5 $\pm$ 7.4 | 45.7 $\pm$ 8.3 |
| 14:1n-5      | 0 $\pm$ 0                      | 0 $\pm$ 0      | 0 $\pm$ 0      | 0 $\pm$ 0                   | 0 $\pm$ 0      | 0 $\pm$ 0      | 0.1 $\pm$ 0.1               | 0 $\pm$ 0      | 0.5 $\pm$ 0.1  | 0.2 $\pm$ 0.2               | 0 $\pm$ 0      | 0 $\pm$ 0      | 0.2 $\pm$ 0.3              | 0.1 $\pm$ 0.1  | 0 $\pm$ 0      |
| 16:1n-11     | 0.3 $\pm$ 0.3                  | 0 $\pm$ 0      | 0 $\pm$ 0      | 0.1 $\pm$ 0.1               | 0 $\pm$ 0      | 0 $\pm$ 0      | 0 $\pm$ 0                   | 0 $\pm$ 0      | 0 $\pm$ 0      | 0.1 $\pm$ 0.1               | 0 $\pm$ 0      | 0.6 $\pm$ 0.1  | 0 $\pm$ 0                  | 0 $\pm$ 0      | 0 $\pm$ 0      |
| 16:1n-9      | 0.9 $\pm$ 0.1                  | 1.5 $\pm$ 0.9  | 0.3 $\pm$ 0.5  | 0.2 $\pm$ 0.2               | 2 $\pm$ 0.2    | 1.2 $\pm$ 0.2  | 0.6 $\pm$ 0.3               | 0.4 $\pm$ 0.4  | 0.7 $\pm$ 0.2  | 0.9 $\pm$ 0.2               | 0.5 $\pm$ 0.1  | 0.9 $\pm$ 0.1  | 0.5 $\pm$ 0.4              | 0.8 $\pm$ 0.1  | 0.5 $\pm$ 0.4  |
| 16:1n-7      | 3.8 $\pm$ 0.1                  | 1.9 $\pm$ 1.5  | 5.6 $\pm$ 3    | 0.8 $\pm$ 0.4               | 4.5 $\pm$ 0.5  | 8.8 $\pm$ 0.1  | 2.7 $\pm$ 1.8               | 0.9 $\pm$ 0.2  | 7.3 $\pm$ 2.4  | 2.5 $\pm$ 1.1               | 1.6 $\pm$ 0.7  | 0 $\pm$ 0      | 7.9 $\pm$ 0.6              | 3.4 $\pm$ 0.8  | 9 $\pm$ 1.9    |

|          |          |         |         |         |          |          |         |         |         |          |         |          |          |          |          |
|----------|----------|---------|---------|---------|----------|----------|---------|---------|---------|----------|---------|----------|----------|----------|----------|
| 16:1n-5  | 0.5±0.1  | 0.8±0.1 | 0.4±0.4 | 0.1±0   | 0.6±0.1  | 0.7±0.1  | 0.4±0   | 0.5±0.4 | 0.8±0.2 | 0.3±0.1  | 0.4±0.1 | 1.2±0.3  | 0.5±0.4  | 0.1±0.2  | 0.8±0.7  |
| 17:1n-7  | 0.1±0.2  | 0.4±0.1 | 0.8±0.3 | 0.2±0.1 | 0.4±0.1  | 0.6±0.1  | 0.6±0.3 | 0.8±0.1 | 0.3±0.2 | 0.7±0.3  | 0.8±0.1 | 0.7±0.2  | 0.4±0.3  | 1.2±0.2  | 0.1±0.3  |
| 18:1n-11 | 0.5±0.3  | 0±0     | 0±0     | 0±0     | 0±0      | 0±0      | 0±0     | 0±0     | 0±0     | 0.1±0.1  | 0±0     | 0.3±0    | 0±0      | 0±0      | 0±0      |
| 18:1n-9  | 1.6±0.7  | 0.3±0.5 | 1.3±2.3 | 1±0.7   | 2.5±0.7  | 2.9±0.2  | 0.9±0.8 | 0±0     | 1.9±1   | 2.2±0.9  | 0.2±0.3 | 3.1±1.1  | 1.8±0.3  | 5.8±1.4  | 2.3±0.2  |
| 18:1n-7  | 2±0.2    | 0±0     | 0±0     | 1.1±0.3 | 2.7±0.5  | 5.8±0.3  | 2.1±1.3 | 0.5±0.5 | 4.2±1.5 | 2±0.8    | 0.6±0.7 | 6.9±1.4  | 4.3±0.6  | 3.7±1    | 4.6±1.1  |
| 18:1n-5  | 0.6±0.1  | 0.1±0.2 | 0±0     | 0.1±0.1 | 0.1±0.2  | 0±0      | 0.4±0   | 0±0     | 0.3±0.2 | 0.3±0.2  | 0±0     | 0.3±0.3  | 0.6±0.3  | 0±0      | 0±0      |
| 20:1n-11 | 1.2±0.4  | 1.1±1.5 | 0.3±0.5 | 0.2±0.1 | 3.6±0.6  | 0.5±0.4  | 0.5±0.4 | 1.2±1   | 0.6±0.6 | 0.6±0.3  | 0.4±0.7 | 0.8±0    | 0.5±0.4  | 3.6±0.8  | 0.1±0.3  |
| 20:1n-9  | 0.3±0    | 0.3±0.5 | 0.3±0.4 | 0.1±0   | 0±0      | 0.3±0.3  | 0.3±0.2 | 0±0     | 0.4±0.8 | 0.3±0    | 0.5±0.4 | 0.1±0.2  | 0.3±0.3  | 0±0      | 0±0      |
| 20:1n-7  | 0.6±0.5  | 0±0     | 0±0     | 0.1±0   | 0±0      | 0±0      | 0.2±0.1 | 0±0     | 0±0     | 0.2±0.1  | 0±0     | 0.1±0.2  | 0.3±0.3  | 0±0      | 0±0      |
| 22:1n-9  | 0.2±0.1  | 0±0     | 0.3±0.6 | 0±0     | 0±0      | 0±0      | 0±0     | 0±0     | 0±0     | 0±0      | 0±0     | 0±0      | 0±0      | 0±0      | 0±0      |
| Σ MUFA   | 12.7±1.3 | 6.6±4.2 | 9.2±6.4 | 3.9±0.5 | 16.5±2.7 | 20.7±0.6 | 8.7±4.8 | 4.3±2.4 | 17±6.6  | 10.4±2.5 | 5.2±1.9 | 15.1±3.8 | 17.3±3.4 | 18.6±4.3 | 17.5±4.7 |
| 16:2n-4  | 0.2±0.2  | 0±0     | 0.2±0.4 | 0.2±0.2 | 0.1±0.1  | 0.7±0.1  | 2.1±0.7 | 0±0     | 0.4±0.5 | 0.9±1.1  | 0.3±0.3 | 0.2±0.2  | 0.9±0.2  | 1.5±0.3  | 0.8±0.7  |
| 16:3n-4  | 0.6±0.1  | 0.3±0.5 | 0.7±0.6 | 0.1±0.1 | 1.2±0.1  | 1.3±0.1  | 0±0     | 0±0     | 0±0     | 0.5±0.1  | 0±0     | 1±0.9    | 0.5±0.4  | 0.3±0.3  | 0.5±0.4  |
| 16:3n-6  | 0.4±0.2  | 0.2±0.3 | 0±0     | 0.1±0.1 | 0±0      | 0.3±0.3  | 0.4±0.3 | 0±0     | 0.2±0.4 | 0.3±0.1  | 0.1±0.2 | 1.1±0.2  | 0.3±0.3  | 0±0      | 0±0      |
| 16:3n-3  | 0.2±0.1  | 0±0     | 0.2±0.3 | 0.1±0.1 | 1±0.1    | 1.2±0.3  | 0.6±0.5 | 0±0     | 1.2±0.9 | 0.4±0.1  | 0.3±0.3 | 0.9±0.2  | 0.1±0.1  | 0.1±0.2  | 0.2±0.3  |
| 16:4n-3  | 0.3±0.1  | 1.3±1.1 | 1.2±0.1 | 0.2±0.2 | 1.3±0.1  | 0.7±0.1  | 0±0     | 0±0     | 0±0     | 0±0      | 0±0     | 0±0      | 0±0      | 0±0      | 0±0      |
| 18:2n-6  | 4.2±2.1  | 0.9±0.8 | 0.7±1   | 1.9±0.4 | 1.2±0.2  | 1.1±0.2  | 3±1.8   | 0.9±0.1 | 1.2±0.3 | 2.3±0.9  | 0.9±0.2 | 1.4±0.3  | 3.1±0.6  | 2.5±0.5  | 1.3±0.4  |
| 18:2n-4  | 0.2±0.1  | 0.2±0.4 | 0±0     | 0±0.1   | 0.2±0.2  | 0.4±0.1  | 0±0     | 0±0     | 0±0     | 0±0      | 0±0     | 0±0      | 0±0      | 0±0      | 0±0      |
| 18:3n-6  | 0.2±0    | 0.1±0.3 | 0.4±0.7 | 0.1±0   | 0.3±0    | 0±0      | 0.3±0   | 0±0     | 0.2±0.2 | 0.2±0.2  | 0.1±0.2 | 0.4±0.1  | 0.2±0.1  | 0.2±0.3  | 0±0      |
| 18:3n-4  | 0.6±0.1  | 1.4±0.5 | 5.9±1.7 | 0.1±0   | 1.2±0.4  | 1.6±0.1  | 0.4±0   | 0.8±0.3 | 2.5±1.7 | 0.2±0    | 0.7±0.3 | 0.7±0.1  | 0±0.1    | 0.2±0.1  | 3.2±0.4  |
| 18:3n-3  | 0.7±0.3  | 0.6±0.7 | 0.3±0.5 | 0.2±0.1 | 1.3±0.2  | 0.7±0    | 0.5±0.2 | 0.2±0.3 | 0.4±0.4 | 0.3±0.2  | 0.4±0.4 | 0.7±0.1  | 0.5±0.4  | 2.8±0.8  | 0.3±0.5  |
| 18:4n-3  | 1.1±0.9  | 2.7±0.3 | 1.2±0.2 | 0.2±0.1 | 3.8±0.5  | 1.6±0.2  | 1±0.4   | 2.5±0.5 | 2.2±0.6 | 0.8±0.3  | 1.9±0.6 | 2.5±0.5  | 1.1±0.4  | 4.3±1.2  | 0.9±0.9  |
| 20:2n-6  | 0.6±0.2  | 1.3±0.2 | 0.9±0.2 | 0.1±0   | 0.1±0.2  | 0.2±0.3  | 0.3±0   | 0±0     | 0.4±0.7 | 0.4±0.4  | 1.1±0.2 | 1.3±0.1  | 0.5±0.4  | 1.6±0.5  | 1.3±0.6  |
| 20:3n-6  | 0.2±0    | 0.5±0   | 0±0     | 0.1±0   | 0.5±0    | 0.5±0.1  | 0.2±0.1 | 0±0     | 0.4±0.1 | 0.3±0.2  | 0.3±0.6 | 0.4±0    | 0.2±0.2  | 0±0      | 0±0      |
| 20:3n-3  | 0.2±0    | 0.5±0.9 | 0±0     | 0.1±0   | 0±0      | 0.3±0.2  | 0±0     | 0±0     | 0±0     | 0.2±0.1  | 0±0     | 0.4±0    | 1.7±1.5  | 0.4±0.2  | 0.2±0.3  |
| 20:4n-6  | 6.3±0.9  | 0±0     | 0.7±0.6 | 1.6±0.2 | 0.2±0.2  | 1.5±0.1  | 2.8±1.7 | 0.2±0.3 | 1.2±0.4 | 2±0.7    | 0.1±0.2 | 2.2±0.4  | 5.9±1.6  | 0.2±0.2  | 1.8±0.7  |
| 20:4n-3  | 0.4±0.2  | 1.6±0.2 | 1.1±0.2 | 0.1±0   | 0.7±0    | 0.7±0.1  | 0.8±0.3 | 2.3±0.5 | 0.6±0.1 | 1.3±0.5  | 2.2±0.9 | 0.5±0.4  | 0.2±0.2  | 1.7±1    | 0±0      |
| 20:5n-3  | 8.2±2.1  | 2.2±1.2 | 4.6±1   | 1.4±0.7 | 4.5±0.6  | 6.3±1.2  | 3.4±2.5 | 0.8±0.3 | 3±3     | 2.2±0.6  | 1.7±1   | 9.7±2.3  | 11.2±4.4 | 6.7±1.8  | 8.5±3.1  |
| 21:5n-3  | 0±0      | 0±0     | 0±0     | 0±0     | 0±0      | 0±0      | 0±0     | 0±0     | 3±5.2   | 2.3±3.4  | 0±0     | 0±0      | 0±0      | 0±0      | 0±0      |



|             |          |          |          |         |         |          |          |          |          |          |          |          |         |          |          |
|-------------|----------|----------|----------|---------|---------|----------|----------|----------|----------|----------|----------|----------|---------|----------|----------|
| 22:2n-6     | 0.3±0.1  | 0.4±0    | 0.9±0.1  | 0.3±0   | 0.9±0   | 1.3±0.2  | 2.1±1.5  | 7.3±1    | 2.8±2    | 1.5±0.8  | 9.1±3.2  | 3±2.5    | 3±2.2   | 2.7±1.2  | 2.9±1.6  |
| 22:4n-6     | 0.6±0.5  | 0.5±0.1  | 0±0      | 0.1±0   | 0±0     | 0±0      | 0±0      | 0±0      | 0±0      | 0±0      | 0±0      | 0±0      | 0±0     | 0±0      | 0±0      |
| 22:5n-6     | 0.7±0.1  | 2.1±1.3  | 1.7±0.5  | 0.1±0   | 0.4±0   | 0.6±0.1  | 1.9±0.2  | 4.4±0.5  | 2.5±0.9  | 1.6±0.6  | 2.3±0.8  | 0.9±0.4  | 1±1     | 1.7±0.7  | 0.2±0.3  |
| 22:5n-3     | 0.7±0.8  | 0±0      | 0±0      | 0.1±0   | 0.1±0.2 | 0±0      | 0.7±0.1  | 2.1±0.6  | 2.1±1.7  | 0.6±0.5  | 2.2±0.5  | 2.3±0.7  | 0.5±0.3 | 1.3±1.2  | 0.6±0.6  |
| 22:6n-3     | 4.3±2.8  | 0.9±1.1  | 0.7±0.7  | 0.5±0.2 | 2.9±0.4 | 1.9±0.2  | 1.7±0.3  | 4±0.5    | 4.5±0.8  | 1.5±2.1  | 0±0      | 3.6±1.7  | 3.7±1.7 | 6±1.8    | 2.9±1.1  |
| ∑ PUFA      | 31.2±6.5 | 17.6±4.7 | 21.5±3.2 | 7.8±1.6 | 22±1.8  | 22.9±1.8 | 22.3±6.1 | 25.6±1.6 | 28.7±2.3 | 19.8±4.7 | 23.9±4.9 | 33.3±3.1 | 34.5±7  | 33.9±4.9 | 25.6±5.6 |
| A           | 0.5±0.4  | 0±0      | 0±0      | 0.1±0   | 0.1±0.1 | 0±0      | 0.2±0    | 0±0      | 0±0      | 0.3±0    | 0±0      | 0±0      | 1.2±1.4 | 0±0      | 0±0      |
| M           | 0.8±0.2  | 0.4±0    | 0.2±0.4  | 0.2±0.1 | 0.4±0   | 0±0      | 0.5±0.2  | 0±0      | 0±0      | 0.4±0.2  | 0±0      | 0±0      | 0.4±0.3 | 0±0      | 0±0      |
| N           | 0.4±0.1  | 0.5±0    | 1.4±1.8  | 0.2±0.1 | 0.5±0   | 0.6±0.1  | 0.5±0.2  | 0±0      | 0.1±0.2  | 0.4±0    | 0.7±0.6  | 0.4±0    | 0±0     | 0±0      | 0±0      |
| O           | 0.8±0    | 5.2±2.1  | 5.5±3.9  | 0.8±0.6 | 3.1±0.6 | 0.5±0.5  | 0±0      | 0±0      | 0±0      | 0±0      | 0±0      | 0±0      | 1±0.6   | 2.2±1.5  | 2.7±2.1  |
| P           | 1.4±0    | 4±0.6    | 4.9±1.1  | 0.5±0.2 | 1.9±0.1 | 3.9±0.5  | 1.1±0.5  | 0.9±0.8  | 4.8±1.3  | 1.4±1.5  | 1.2±0.3  | 0.6±0.6  | 0.4±0.3 | 0.3±0.3  | 0.5±0.5  |
| W           | 0±0      | 0±0      | 0±0      | 0.1±0   | 0.6±0   | 0.8±0.1  | 0.1±0.1  | 0.6±0    | 0.5±0    | 0.2±0    | 0.7±0.6  | 0.6±0.1  | 0.2±0.2 | 0.2±0.2  | 0±0      |
| ∑ UK FA     | 4±0.7    | 10.1±1.5 | 11.9±5.2 | 1.7±1.1 | 6.5±0.6 | 5.8±1.1  | 2.4±0.6  | 1.5±0.8  | 5.4±1.3  | 2.6±1.4  | 2.6±1.3  | 1.6±0.6  | 3.2±1.2 | 2.7±1.5  | 3.2±1.9  |
| PUFA/SFA    | 0.7±0.2  | 0.3±0.1  | 0.5±0.1  | 0.1±0   | 0.4±0.1 | 0.6±0.1  | 0.4±0.2  | 0.4±0    | 0.7±0.2  | 0.3±0.1  | 0.4±0.1  | 0.8±0.1  | 1±0.4   | 0.9±0.3  | 0.6±0.2  |
| EPA/DHA     | 2.3±1    | NA       | NA       | 2.8±0.5 | 1.6±0   | 3.4±0.4  | 1.9±1.3  | 0.2±0.1  | 0.8±0.8  | NA       | NA       | 3.1±1.6  | 3.1±0.6 | 1.1±0    | 2.9±0.1  |
| ∑ n-3/∑ n-6 | 1.2±0.6  | 1.7±0.4  | 1.8±0.5  | 0.7±0.3 | 4.4±0   | 2.5±0.4  | 0.8±0.2  | 0.9±0.1  | 2.1±1.1  | 1.2±0.4  | 0.6±0.1  | 1.9±0.4  | 1.3±0.3 | 2.7±0.7  | 2±1.1    |

906

907

908 **Table S3: Stable isotope (mean  $\pm$  SD, n = 3) composition of organic matter sources (Biofilm, suspended particulate organic matter (SPOM), superficial**  
 909 **sedimentary organic matter (SSOM)) over the sampling survey.**

|                       | S1 = 26 <sup>th</sup> February |                 |               | S2 = 21 <sup>th</sup> March |                 |                 | S3 = 28 <sup>th</sup> March |                 |                 | S4 = 12 <sup>th</sup> April |                 |                 | S5 = 14 <sup>th</sup> June |                 |                 |
|-----------------------|--------------------------------|-----------------|---------------|-----------------------------|-----------------|-----------------|-----------------------------|-----------------|-----------------|-----------------------------|-----------------|-----------------|----------------------------|-----------------|-----------------|
|                       | Biofilm                        | SPOM            | SSOM          | Biofilm                     | SPOM            | SSOM            | Biofilm                     | SPOM            | SSOM            | Biofilm                     | SPOM            | SSOM            | Biofilm                    | SPOM            | SSOM            |
| $\delta^{13}\text{C}$ | -22.6 $\pm$ 0.1                | -25.2 $\pm$ 0.2 | -23 $\pm$ 0.2 | -23.4 $\pm$ 0.5             | -25.3 $\pm$ 0.1 | -22.7 $\pm$ 0.3 | -22.6 $\pm$ 0.4             | -25.3 $\pm$ 0.1 | -22.6 $\pm$ 0.1 | -23.4 $\pm$ 1               | -24.6 $\pm$ 0.4 | -22.5 $\pm$ 0.1 | -21.8 $\pm$ 0.2            | -25.1 $\pm$ 0.3 | -22.5 $\pm$ 0.1 |
| $\delta^{15}\text{N}$ | 9.4 $\pm$ 0.6                  | 7.3 $\pm$ 0     | 7 $\pm$ 0.7   | 10.3 $\pm$ 0.5              | 6.7 $\pm$ 0.3   | 7.1 $\pm$ 0.1   | 9.2 $\pm$ 0.7               | 6.6 $\pm$ 0.1   | 7 $\pm$ 0.1     | 9.2 $\pm$ 0.7               | 6.9 $\pm$ 0.9   | 7.1 $\pm$ 0.1   | 9.4 $\pm$ 0.7              | 6.4 $\pm$ 0.5   | 6.9 $\pm$ 0.2   |
| C/N                   | 3.9 $\pm$ 0.3                  | 6.6 $\pm$ 1.1   | 5.1 $\pm$ 1.3 | 5.8 $\pm$ 3                 | 5.9 $\pm$ 0.6   | 5.3 $\pm$ 0.6   | 5.3 $\pm$ 0.4               | 6 $\pm$ 0.5     | 5.5 $\pm$ 0.6   | 5 $\pm$ 0.5                 | 5.6 $\pm$ 0.9   | 5.4 $\pm$ 0.5   | 3.6 $\pm$ 0.6              | 3.9 $\pm$ 0.4   | 5.9 $\pm$ 0.8   |

910

911 **Table S4: Fatty acid (FA) (% , mean  $\pm$  SD, n = 5) composition of the three ontogenic stages of *Crepidula fornicata* (motile males, sessile males, sessile**  
912 **females) over the sampling survey. Only FA accounting for more than 0.5 % of total FA in at least one sample was shown. BFA: Branched FA; SFA:**  
913 **saturated FA; MUFA: monounsaturated FA; PUFA: polyunsaturated FA; NMI FA: non-methyl-interrupted FA; DMA: Dimethyl acetals FA; EPA:**  
914 **20:5n-3; DHA: 22:6n-3.**

| Fatty acids  | S1 = 26 <sup>th</sup> February |                |                | S2 = 21 <sup>th</sup> March |                |                | S3 = 28 <sup>th</sup> March |                |                | S4 = 12 <sup>th</sup> April |                |                | S5 = 14 <sup>th</sup> June |                |                |
|--------------|--------------------------------|----------------|----------------|-----------------------------|----------------|----------------|-----------------------------|----------------|----------------|-----------------------------|----------------|----------------|----------------------------|----------------|----------------|
|              | Sessile female                 | Sessile male   | Motile male    | Sessile female              | Sessile male   | Motile male    | Sessile female              | Sessile male   | Motile male    | Sessile female              | Sessile male   | Motile male    | Sessile female             | Sessile male   | Motile male    |
| TMTD         | 1.3 $\pm$ 0.3                  | 2.1 $\pm$ 1.1  | 0.8 $\pm$ 0.6  | 1.3 $\pm$ 0.2               | 0 $\pm$ 0.1    | 0.5 $\pm$ 0.4  | 1.3 $\pm$ 0.7               | 2.5 $\pm$ 0.4  | 0.9 $\pm$ 1.2  | 2.1 $\pm$ 1                 | 2.9 $\pm$ 0.8  | 2.5 $\pm$ 1    | 2.1 $\pm$ 1.7              | 2 $\pm$ 0.7    | 1 $\pm$ 0.6    |
| 15:0iso      | 0.2 $\pm$ 0                    | 0 $\pm$ 0      | 0 $\pm$ 0      | 0.1 $\pm$ 0.1               | 0.1 $\pm$ 0.1  | 0.1 $\pm$ 0.2  | 0.1 $\pm$ 0.1               | 0 $\pm$ 0      | 0 $\pm$ 0      | 0.1 $\pm$ 0.1               | 0.1 $\pm$ 0.1  | 0.3 $\pm$ 0.4  | 0.1 $\pm$ 0.1              | 0.5 $\pm$ 0.3  | 1 $\pm$ 0.2    |
| 15:0ant      | 0.1 $\pm$ 0                    | 0 $\pm$ 0      | 0 $\pm$ 0      | 0 $\pm$ 0                   | 0 $\pm$ 0      | 0 $\pm$ 0      | 0 $\pm$ 0.1                 | 0 $\pm$ 0      | 0 $\pm$ 0      | 0.1 $\pm$ 0.1               | 0 $\pm$ 0      | 0.3 $\pm$ 0.5  | 0 $\pm$ 0                  | 0.4 $\pm$ 0.3  | 0.7 $\pm$ 0.1  |
| 16:0iso      | 1.3 $\pm$ 0.5                  | 1.1 $\pm$ 0.3  | 1.1 $\pm$ 0.1  | 0.7 $\pm$ 0.1               | 0.9 $\pm$ 0.2  | 0.1 $\pm$ 0.2  | 0.9 $\pm$ 0.1               | 1 $\pm$ 0.1    | 0.6 $\pm$ 1    | 0.8 $\pm$ 0.2               | 0.5 $\pm$ 0.1  | 0.6 $\pm$ 0.4  | 0.7 $\pm$ 0.2              | 0.3 $\pm$ 0    | 0.4 $\pm$ 0.2  |
| 17:0iso      | 5.4 $\pm$ 1.8                  | 4.1 $\pm$ 1    | 3.4 $\pm$ 0.5  | 3.1 $\pm$ 1.8               | 1.7 $\pm$ 2.4  | 1.1 $\pm$ 1    | 3.5 $\pm$ 2                 | 2.8 $\pm$ 1.4  | 2.5 $\pm$ 1.1  | 3.8 $\pm$ 1                 | 2.4 $\pm$ 0.1  | 3 $\pm$ 0.3    | 3 $\pm$ 1                  | 1.3 $\pm$ 0.2  | 1.4 $\pm$ 0.3  |
| 17:0ant      | 3.6 $\pm$ 1.6                  | 3.2 $\pm$ 0.7  | 2.4 $\pm$ 0.6  | 2.1 $\pm$ 0.5               | 3.5 $\pm$ 1    | 1.5 $\pm$ 0.3  | 2.8 $\pm$ 0.7               | 3.1 $\pm$ 0.4  | 3 $\pm$ 1      | 2.4 $\pm$ 0.7               | 1.8 $\pm$ 0.2  | 2.5 $\pm$ 0.3  | 2.4 $\pm$ 0.9              | 1.2 $\pm$ 0.2  | 1.5 $\pm$ 0.3  |
| 18:0iso      | 0.7 $\pm$ 0.4                  | 0.6 $\pm$ 0.4  | 0.3 $\pm$ 0.4  | 0.3 $\pm$ 0.3               | 0.2 $\pm$ 0.3  | 0 $\pm$ 0      | 0.5 $\pm$ 0.5               | 0.9 $\pm$ 0.2  | 0.2 $\pm$ 0.4  | 0.4 $\pm$ 0.6               | 0.7 $\pm$ 0.1  | 2.1 $\pm$ 2.9  | 0.5 $\pm$ 0.4              | 0.1 $\pm$ 0.1  | 0 $\pm$ 0      |
| $\Sigma$ BFA | 11.2 $\pm$ 4.3                 | 8.9 $\pm$ 2.1  | 7.1 $\pm$ 1.3  | 6.3 $\pm$ 2.3               | 6.4 $\pm$ 2.6  | 2.8 $\pm$ 1    | 7.8 $\pm$ 2.6               | 7.8 $\pm$ 1.8  | 6.3 $\pm$ 2.2  | 7.5 $\pm$ 2.2               | 5.6 $\pm$ 0.3  | 8.9 $\pm$ 4    | 6.6 $\pm$ 2.6              | 3.8 $\pm$ 1    | 5 $\pm$ 0.9    |
| 14:0         | 1.5 $\pm$ 0.3                  | 1.3 $\pm$ 0.7  | 1.4 $\pm$ 0.4  | 1.3 $\pm$ 0.2               | 3 $\pm$ 0.9    | 1.6 $\pm$ 0.1  | 1.3 $\pm$ 0.4               | 1.4 $\pm$ 0.3  | 0.8 $\pm$ 0.8  | 2 $\pm$ 0.5                 | 2.3 $\pm$ 0.4  | 1.9 $\pm$ 0.7  | 2.4 $\pm$ 0.6              | 2.7 $\pm$ 0.6  | 2.2 $\pm$ 0.2  |
| 15:0         | 0.6 $\pm$ 0.1                  | 0.6 $\pm$ 0.2  | 0.8 $\pm$ 0.2  | 0.4 $\pm$ 0                 | 0.5 $\pm$ 0.1  | 0.6 $\pm$ 0.4  | 0.5 $\pm$ 0.1               | 0.4 $\pm$ 0    | 0.1 $\pm$ 0.3  | 0.5 $\pm$ 0.1               | 0.5 $\pm$ 0.1  | 0.6 $\pm$ 0    | 0.4 $\pm$ 0                | 0.7 $\pm$ 0.4  | 1.5 $\pm$ 0.3  |
| 16:0         | 11.9 $\pm$ 0.8                 | 16.7 $\pm$ 3.1 | 25.2 $\pm$ 3.5 | 11.7 $\pm$ 1                | 11.6 $\pm$ 3.3 | 33.7 $\pm$ 1.7 | 10.9 $\pm$ 1                | 13 $\pm$ 0.9   | 12.3 $\pm$ 2.3 | 12 $\pm$ 0.4                | 12.6 $\pm$ 3.1 | 14.2 $\pm$ 2.1 | 11.2 $\pm$ 0.9             | 9.7 $\pm$ 1.4  | 7.6 $\pm$ 0.9  |
| 17:0         | 1.5 $\pm$ 0.1                  | 1.2 $\pm$ 0.3  | 1 $\pm$ 0.1    | 1.4 $\pm$ 0.1               | 1.2 $\pm$ 0.1  | 0.7 $\pm$ 0.4  | 1 $\pm$ 0.5                 | 0.8 $\pm$ 0.1  | 0.4 $\pm$ 0.5  | 0.9 $\pm$ 0.5               | 0.8 $\pm$ 0.1  | 1 $\pm$ 0.1    | 1.1 $\pm$ 0.2              | 0.7 $\pm$ 0.1  | 0.7 $\pm$ 0.1  |
| 18:0         | 6.3 $\pm$ 0.9                  | 17.7 $\pm$ 7.3 | 27.5 $\pm$ 4.2 | 6.8 $\pm$ 0.7               | 9.2 $\pm$ 3.9  | 35.6 $\pm$ 0.9 | 6.6 $\pm$ 0.9               | 10.4 $\pm$ 1.3 | 14.8 $\pm$ 4.5 | 6.9 $\pm$ 0.4               | 9.1 $\pm$ 5.6  | 14.3 $\pm$ 3.1 | 6.9 $\pm$ 1.2              | 5.6 $\pm$ 1.1  | 7.5 $\pm$ 1.1  |
| 20:0         | 0.5 $\pm$ 0.1                  | 0.7 $\pm$ 0.2  | 0.5 $\pm$ 0.3  | 0.5 $\pm$ 0.3               | 0.2 $\pm$ 0.2  | 0.6 $\pm$ 0.3  | 0.2 $\pm$ 0                 | 0.2 $\pm$ 0.3  | 0 $\pm$ 0      | 0.2 $\pm$ 0                 | 0.2 $\pm$ 0.1  | 0.1 $\pm$ 0.2  | 0.4 $\pm$ 0.1              | 0.2 $\pm$ 0.1  | 0.3 $\pm$ 0    |
| 22:0         | 0.5 $\pm$ 0.1                  | 0.3 $\pm$ 0.2  | 0.1 $\pm$ 0.2  | 0.4 $\pm$ 0.1               | 0.2 $\pm$ 0    | 0 $\pm$ 0      | 0.4 $\pm$ 0.1               | 0.1 $\pm$ 0.1  | 0 $\pm$ 0      | 0.3 $\pm$ 0.1               | 0.2 $\pm$ 0.1  | 0 $\pm$ 0      | 0.3 $\pm$ 0.1              | 0 $\pm$ 0      | 0 $\pm$ 0      |
| 24:0         | 0.4 $\pm$ 0.1                  | 0.6 $\pm$ 0.4  | 0.6 $\pm$ 0.4  | 0.2 $\pm$ 0                 | 0.2 $\pm$ 0.1  | 0.7 $\pm$ 0.2  | 0.3 $\pm$ 0.2               | 0.1 $\pm$ 0.1  | 1.6 $\pm$ 1.8  | 0.4 $\pm$ 0.1               | 0.3 $\pm$ 0.1  | 1.2 $\pm$ 0.5  | 0.3 $\pm$ 0.1              | 0.1 $\pm$ 0.1  | 0 $\pm$ 0      |
| $\Sigma$ SFA | 23.2 $\pm$ 1.5                 | 39.2 $\pm$ 9.6 | 57 $\pm$ 8.2   | 22.9 $\pm$ 1.5              | 26 $\pm$ 7.1   | 73.5 $\pm$ 2.4 | 21.4 $\pm$ 1.1              | 26.4 $\pm$ 1.7 | 30.1 $\pm$ 5.9 | 23.3 $\pm$ 0.9              | 25.8 $\pm$ 8.6 | 33.3 $\pm$ 4.6 | 23.1 $\pm$ 1.7             | 19.9 $\pm$ 1.2 | 19.7 $\pm$ 1.6 |
| 14:1n-5      | 0 $\pm$ 0                      | 0 $\pm$ 0      | 0 $\pm$ 0      | 0 $\pm$ 0                   | 0 $\pm$ 0      | 0 $\pm$ 0      | 0.1 $\pm$ 0.1               | 0 $\pm$ 0      | 0 $\pm$ 0      | 0 $\pm$ 0                   | 0.1 $\pm$ 0.1  | 0.2 $\pm$ 0.5  | 0.1 $\pm$ 0.1              | 0 $\pm$ 0      | 0 $\pm$ 0      |
| 16:1n-11     | 0 $\pm$ 0                      | 0 $\pm$ 0      | 0 $\pm$ 0      | 0 $\pm$ 0                   | 0 $\pm$ 0      | 0 $\pm$ 0      | 0.4 $\pm$ 0.1               | 0.7 $\pm$ 0.4  | 0 $\pm$ 0      | 0.1 $\pm$ 0.1               | 0.2 $\pm$ 0.1  | 1.1 $\pm$ 1    | 0 $\pm$ 0                  | 0.1 $\pm$ 0.1  | 0.2 $\pm$ 0.1  |
| 16:1n-9      | 0.7 $\pm$ 0.2                  | 0.5 $\pm$ 0.3  | 0.3 $\pm$ 0.3  | 0.7 $\pm$ 0.2               | 0.1 $\pm$ 0.2  | 0.1 $\pm$ 0.2  | 0.5 $\pm$ 0.1               | 0.7 $\pm$ 0.5  | 0.4 $\pm$ 1    | 0.5 $\pm$ 0                 | 0.6 $\pm$ 0.1  | 0.7 $\pm$ 0.3  | 0.3 $\pm$ 0                | 0.5 $\pm$ 0.4  | 4.1 $\pm$ 2.9  |
| 16:1n-7      | 1.4 $\pm$ 0.6                  | 0.9 $\pm$ 0.2  | 0.8 $\pm$ 0.3  | 1.7 $\pm$ 0.2               | 1.3 $\pm$ 0.4  | 0.3 $\pm$ 0.4  | 1.5 $\pm$ 0.3               | 1.2 $\pm$ 0.4  | 2.6 $\pm$ 1.3  | 2.3 $\pm$ 0.6               | 2.9 $\pm$ 0.8  | 2.1 $\pm$ 0.3  | 3.6 $\pm$ 0.9              | 5.8 $\pm$ 1.9  | 6.4 $\pm$ 1.9  |
| 16:1n-5      | 0.4 $\pm$ 0.4                  | 0 $\pm$ 0      | 0 $\pm$ 0      | 0.3 $\pm$ 0.1               | 0.1 $\pm$ 0.1  | 0 $\pm$ 0      | 0.3 $\pm$ 0.1               | 0.8 $\pm$ 0.4  | 1.4 $\pm$ 1.4  | 0.5 $\pm$ 0.2               | 0.4 $\pm$ 0.2  | 1.8 $\pm$ 1.2  | 0.9 $\pm$ 0.4              | 3.4 $\pm$ 2.1  | 2.2 $\pm$ 4.3  |

|          |          |         |          |          |          |         |          |          |          |          |          |          |          |          |          |
|----------|----------|---------|----------|----------|----------|---------|----------|----------|----------|----------|----------|----------|----------|----------|----------|
| 17:1n-7  | 0.1±0.1  | 0±0     | 0±0      | 0.1±0.1  | 0±0      | 0±0     | 0.4±0.5  | 0.1±0.3  | 0±0      | 0.3±0.4  | 0±0.1    | 0.2±0.3  | 0±0      | 0±0      | 0±0      |
| 18:1n-11 | 0.5±0.2  | 0.4±0.1 | 0.1±0.3  | 0.5±0.1  | 0.4±0.1  | 0±0     | 0.5±0.2  | 0.9±0.2  | 1.6±1    | 0.8±0.2  | 0.5±0.1  | 1.4±1    | 0.7±0.2  | 2.1±1.4  | 6±1      |
| 18:1n-9  | 0±0.1    | 0±0     | 5.1±2.3  | 2.1±0.3  | 2.1±0.2  | 4±0.8   | 2±0.2    | 2.3±0.1  | 1.6±1    | 2±0.2    | 2±0.1    | 1.8±0.4  | 1.5±0.2  | 1.5±0.2  | 1.2±0.2  |
| 18:1n-7  | 2.6±0.2  | 1.8±0.3 | 1.4±0.2  | 2.8±0.3  | 2.1±0.3  | 1±0.1   | 2.5±0.2  | 1.7±0.3  | 0.7±1.1  | 2.3±0.3  | 2.3±0.5  | 2±0.9    | 3.3±0.4  | 4.4±1    | 2.6±0.8  |
| 18:1n-5  | 0.4±0    | 0.2±0.2 | 0.1±0.2  | 0.4±0    | 0.4±0    | 0.2±0.4 | 0.4±0    | 0.2±0.2  | 0.3±0.4  | 0.3±0    | 0.3±0.1  | 0.5±0.3  | 0.5±0.1  | 0.6±0.1  | 0.6±0.1  |
| 20:1n-11 | 5.8±0.5  | 5.3±0.7 | 3.2±0.7  | 6.1±0.8  | 6.4±0.9  | 1.9±0.5 | 5.6±0.6  | 4±0.9    | 2.3±1.5  | 5.2±0.9  | 4.1±1    | 2.3±0.6  | 5.9±0.6  | 4.3±0.8  | 2.5±0.3  |
| 20:1n-9  | 0.9±0.1  | 1±0.2   | 0.5±0.4  | 0.8±0    | 1.2±0.1  | 0.1±0.2 | 0.8±0.2  | 1±0.2    | 0.4±0.5  | 0.8±0.1  | 0.9±0.1  | 0.7±0.1  | 0.6±0.2  | 0.7±0.1  | 0.4±0.1  |
| 20:1n-7  | 4.7±0.5  | 3.9±0.6 | 2.4±0.8  | 4.6±0.2  | 5.2±0.9  | 1.3±0.2 | 4.6±0.4  | 3.5±0.8  | 5.9±4.3  | 4.2±0.3  | 4.2±1.1  | 4±1      | 5.5±0.9  | 5.5±0.7  | 5±0.8    |
| Σ MUFA   | 17.8±1.1 | 14±2.1  | 13.9±2.5 | 20.4±0.6 | 19.4±1.6 | 8.8±0.7 | 19.9±1   | 17.2±1.5 | 17.2±1.5 | 19.9±0.9 | 18.8±2.8 | 18.9±2.8 | 22.9±1.1 | 28.7±1.4 | 31.3±0.5 |
| 16:2n-7  | 0±0      | 0±0     | 0±0      | 0.7±1.5  | 2.6±2.5  | 0.7±1   | 0.8±1.7  | 0±0      | 0±0      | 0±0      | 0±0      | 0±0      | 0±0      | 0±0      | 0±0      |
| 16:2n-4  | 0.4±0.5  | 0.1±0.1 | 0±0      | 0.2±0    | 0.5±0.4  | 0.2±0.5 | 0.7±0.3  | 1±0.9    | 0.2±0.4  | 0.4±0.2  | 0.7±0.3  | 0.1±0.3  | 0.5±0.2  | 0.7±0.4  | 0.6±0.2  |
| 16:3n-4  | 0.1±0.1  | 0±0     | 0±0      | 0.1±0.1  | 0±0.1    | 0±0     | 0±0.1    | 0.1±0.1  | 0±0      | 0.1±0.2  | 0.3±0.2  | 0.3±0.3  | 0.2±0.1  | 0.3±0.1  | 0.1±0.1  |
| 16:3n-6  | 0.4±0.3  | 0.6±0.2 | 0.2±0.3  | 0.5±0.1  | 0.1±0.2  | 0±0     | 0.1±0.2  | 0.1±0.3  | 0±0      | 0.5±0.2  | 0.2±0.1  | 0±0      | 0.5±0.2  | 0±0      | 0±0      |
| 16:3n-3  | 0.1±0.1  | 0±0     | 0±0      | 0.1±0.1  | 0±0.1    | 0±0     | 0.1±0.1  | 0.2±0.2  | 0.5±0.7  | 0.3±0.1  | 0.2±0.1  | 1.8±2.7  | 1.6±0.9  | 0.6±0.2  | 0.8±0.5  |
| 16:4n-3  | 0.3±0.2  | 0.2±0.2 | 0±0      | 0.3±0.1  | 0.6±0.5  | 0.1±0.2 | 0±0      | 0±0      | 0±0      | 0±0      | 0±0      | 0±0      | 0.2±0.1  | 0.4±0.1  | 0.6±0.1  |
| 18:2n-6  | 1.3±0.2  | 1.4±0.3 | 1.6±0.3  | 1.2±0.2  | 0.9±0.2  | 0.7±0.4 | 1.1±0.1  | 1.5±0.2  | 0.9±0.6  | 1.3±0.1  | 1.4±0.2  | 1.6±0.5  | 0.9±0.1  | 3±1.3    | 6.3±1.4  |
| 18:2n-4  | 0.4±0.1  | 0.2±0.2 | 0±0      | 0.5±0.1  | 0.3±0.1  | 0±0     | 0.5±0    | 0.4±0    | 0±0      | 0.4±0.1  | 0.3±0.1  | 0±0      | 0.8±0.2  | 0.7±0.2  | 0.4±0.3  |
| 18:3n-6  | 0.1±0    | 0±0     | 0±0      | 0.1±0    | 0.1±0.2  | 0±0     | 0.2±0    | 0±0.1    | 0±0      | 0.1±0.1  | 0.1±0.1  | 0±0      | 0.3±0.2  | 0.2±0.1  | 0.2±0.3  |
| 18:3n-4  | 1±0.5    | 2.7±1.2 | 3.1±1.7  | 0.4±0.3  | 0.4±0.5  | 0±0     | 1.1±0.3  | 3.5±1.4  | 1.3±1.3  | 1±0.4    | 0.6±0.3  | 2.4±0.8  | 0.3±0.1  | 0.3±0    | 0±0      |
| 18:3n-3  | 0.9±0.2  | 0.2±0.2 | 0±0      | 0.9±0.2  | 1±0.8    | 1.7±1   | 0.9±0.1  | 1.2±0.3  | 2.1±3.3  | 1.1±0.2  | 1.6±0.4  | 0.7±0.4  | 0.5±0.1  | 0.9±0.2  | 0.5±0.2  |
| 18:4n-3  | 0.7±0.6  | 0±0     | 0.6±0.6  | 1.8±0.4  | 1.4±0.5  | 2.3±0.2 | 1.7±0.3  | 3±0.6    | 2.9±0.7  | 3.1±1    | 4.4±0.8  | 3.2±0.8  | 2.7±0.5  | 2±0.3    | 1.5±0.2  |
| 18:4n-1  | 0.1±0    | 0±0     | 0±0      | 0.1±0.1  | 0.1±0.1  | 0±0     | 0±0.1    | 0±0      | 0.4±1    | 0±0      | 0±0      | 0±0      | 0.1±0.1  | 0.1±0.1  | 0±0      |
| 20:2n-6  | 1.2±0.1  | 2.2±0.5 | 1.1±0.2  | 1.2±0.2  | 2.1±0.6  | 0.9±0.2 | 1.1±0.2  | 1.1±0.2  | 0.4±0.5  | 1±0.2    | 1±0.1    | 0.5±0.4  | 0.9±0.1  | 0.6±0.1  | 0.4±0    |
| 20:3n-6  | 0.1±0    | 0±0     | 0±0      | 0.1±0.1  | 0±0.1    | 0±0     | 0.2±0.1  | 0±0      | 0.3±0.6  | 0.1±0.1  | 0±0.1    | 0.1±0.3  | 0.2±0.1  | 0.1±0.1  | 0.1±0.1  |
| 20:3n-3  | 0.4±0.1  | 0.1±0.1 | 0±0      | 0.4±0.1  | 0.2±0.1  | 0±0     | 0.4±0.1  | 0.3±0.3  | 0±0      | 0.4±0.1  | 0.4±0.1  | 0±0      | 0.3±0.1  | 0.2±0    | 0.1±0.1  |
| 20:4n-6  | 2.7±0.3  | 3.5±0.5 | 2.3±0.6  | 2.7±0.4  | 3.5±0.3  | 1.2±0.1 | 2.6±0.6  | 2.6±0.5  | 0.8±1.2  | 2.5±0.4  | 1.7±0.4  | 1.4±0.4  | 1.7±0.2  | 1.2±0.1  | 0.7±0.1  |
| 20:4n-3  | 0.6±0.1  | 0.3±0.2 | 0.3±0.3  | 0.6±0.2  | 0.4±0.1  | 0±0     | 0.5±0.1  | 0.6±0.1  | 0.5±0.8  | 0.6±0.1  | 0.8±0.2  | 0.3±0.3  | 0.4±0.1  | 0.5±0.1  | 0.4±0.1  |
| 20:5n-3  | 10.5±2.6 | 5.7±1.2 | 3.3±0.7  | 12.1±1.3 | 8.3±1.3  | 2.5±0.5 | 11.1±1.8 | 6.9±0.9  | 3.4±1.7  | 11.4±1.8 | 11.1±2.6 | 5.8±1.9  | 14.6±2.4 | 16.3±3.4 | 9.4±2.1  |
| 21:5n-3  | 0.4±0    | 0.3±0.2 | 0.1±0.3  | 0.5±0.1  | 0.6±0.1  | 0±0     | 1.5±0.6  | 0.7±0.2  | 0±0      | 0.5±0.1  | 0.8±0.2  | 0.1±0.2  | 0.9±0.2  | 0.8±0.1  | 0.5±0.1  |

|             |            |            |            |            |            |           |            |            |             |            |            |           |            |           |            |
|-------------|------------|------------|------------|------------|------------|-----------|------------|------------|-------------|------------|------------|-----------|------------|-----------|------------|
| 22:2n-6     | 0.2 ± 0    | 0 ± 0      | 0 ± 0      | 0 ± 0      | 0 ± 0      | 0.4 ± 0.1 | 0.2 ± 0.3  | 0 ± 0      | 0 ± 0       | 0.1 ± 0.1  | 0.1 ± 0.1  | 0 ± 0     | 0.3 ± 0.1  | 0.1 ± 0   | 0.4 ± 0.2  |
| 22:4n-6     | 0.6 ± 0.2  | 0.4 ± 0.1  | 0.1 ± 0.2  | 0.5 ± 0.3  | 0.4 ± 0.1  | 0 ± 0     | 0.6 ± 0.1  | 0.2 ± 0.2  | 0 ± 0       | 0.6 ± 0.2  | 0.2 ± 0.1  | 0.4 ± 0.4 | 0.3 ± 0.1  | 0.2 ± 0   | 0 ± 0.1    |
| 22:5n-6     | 0.4 ± 0.1  | 0.3 ± 0.2  | 0.1 ± 0.2  | 0.5 ± 0.1  | 0.4 ± 0.1  | 0 ± 0     | 0.4 ± 0.1  | 0.4 ± 0.4  | 0.5 ± 1     | 0.4 ± 0.1  | 0.4 ± 0.1  | 0.3 ± 0.3 | 0.2 ± 0.1  | 0.2 ± 0   | 0 ± 0.1    |
| 22:5n-3     | 2 ± 0.5    | 1.2 ± 0.3  | 0.5 ± 0.5  | 2.4 ± 0.3  | 1.2 ± 0.2  | 0.4 ± 0.9 | 2.2 ± 1.3  | 1.4 ± 0.4  | 2.1 ± 2.2   | 2.2 ± 0.5  | 2.8 ± 2.2  | 2.8 ± 1.8 | 1.6 ± 0.3  | 1.4 ± 0.1 | 0.9 ± 0.1  |
| 22:6n-3     | 9.7 ± 2.1  | 4.9 ± 0.9  | 2.6 ± 0.5  | 11.1 ± 1.4 | 6 ± 0.6    | 1.9 ± 0.5 | 10.3 ± 1.6 | 7 ± 0.7    | 4.5 ± 2.4   | 9.4 ± 2    | 7.8 ± 1.5  | 5.4 ± 1.5 | 6.1 ± 1.4  | 4.3 ± 0.7 | 2.3 ± 0.3  |
| ∑ PUFA      | 34.7 ± 5.1 | 24.5 ± 4.5 | 15.7 ± 2.5 | 38.8 ± 4.6 | 31.1 ± 2.5 | 13 ± 1.8  | 38.4 ± 3.5 | 32.4 ± 2.4 | 21.1 ± 10.3 | 37.9 ± 3.4 | 37.3 ± 3.7 | 29 ± 4.2  | 36.5 ± 2.9 | 38 ± 2.3  | 33.8 ± 2.6 |
| 20:2i       | 1.1 ± 0.3  | 1.1 ± 0.2  | 0.7 ± 0.5  | 0.9 ± 0.2  | 1.6 ± 0.6  | 0 ± 0     | 0.9 ± 0.2  | 0.8 ± 0.3  | 1.4 ± 2.8   | 0.9 ± 0.2  | 1 ± 0.3    | 0.1 ± 0.3 | 1.1 ± 0.1  | 1.3 ± 0.5 | 0.8 ± 0.2  |
| 20:2j       | 0.5 ± 0.1  | 0.4 ± 0.1  | 0.2 ± 0.2  | 0.4 ± 0    | 0.6 ± 0.1  | 0 ± 0     | 0.4 ± 0.1  | 0.3 ± 0.3  | 0.2 ± 0.5   | 0.3 ± 0.1  | 0.4 ± 0.1  | 0 ± 0     | 0.4 ± 0.1  | 0.4 ± 0.1 | 0.3 ± 0.1  |
| 22:2i       | 1.9 ± 0.3  | 2.6 ± 0.5  | 1.3 ± 0.7  | 1.6 ± 0.5  | 3.8 ± 1.5  | 0.1 ± 0.2 | 1.7 ± 0.4  | 1.9 ± 0.6  | 0.3 ± 0.6   | 1.5 ± 0.3  | 1.7 ± 0.8  | 0.8 ± 0.3 | 1 ± 0.1    | 0.7 ± 0.2 | 0.3 ± 0.2  |
| 22:2j       | 5.4 ± 0.8  | 6 ± 0.6    | 3.2 ± 2    | 5.1 ± 1.1  | 8.7 ± 3.2  | 1.4 ± 0.3 | 4.2 ± 0.7  | 4.4 ± 1.4  | 1.8 ± 1.7   | 4.6 ± 0.8  | 4.5 ± 1.9  | 2 ± 0.7   | 5.3 ± 1    | 3.6 ± 0.6 | 1.7 ± 0.9  |
| 22:3i       | 0.5 ± 0.2  | 1.1 ± 0.3  | 0.1 ± 0.2  | 0.5 ± 0.2  | 1.4 ± 0.6  | 0 ± 0     | 0.5 ± 0.2  | 0 ± 0      | 0 ± 0       | 0.5 ± 0.1  | 0.6 ± 0.3  | 0 ± 0     | 0 ± 0      | 0 ± 0     | 0 ± 0      |
| ∑ NMI FA    | 9.4 ± 1.4  | 11.3 ± 1.2 | 5.4 ± 3.3  | 8.4 ± 1.8  | 16 ± 5.6   | 1.5 ± 0.3 | 7.8 ± 1.3  | 7.3 ± 2.4  | 3.7 ± 3.4   | 7.8 ± 1.4  | 8.2 ± 3.1  | 3 ± 1.1   | 7.9 ± 1.2  | 6 ± 0.5   | 3 ± 1      |
| 16:0DMA     | 0.1 ± 0    | 0.3 ± 0.2  | 0 ± 0      | 0 ± 0      | 0.1 ± 0.1  | 0 ± 0     | 0.2 ± 0.2  | 0.4 ± 0.2  | 0.4 ± 0.5   | 0.5 ± 0.2  | 0.5 ± 0.2  | 1.8 ± 2.1 | 0.5 ± 0.4  | 3.2 ± 2.3 | 7.6 ± 1.9  |
| 18:0DMA     | 1 ± 0.5    | 0 ± 0      | 0 ± 0      | 1.2 ± 0.4  | 0.1 ± 0.1  | 0 ± 0     | 1.7 ± 1    | 4 ± 1.9    | 13.5 ± 5.8  | 0.8 ± 0.4  | 0.8 ± 0.6  | 2.7 ± 2   | 0.5 ± 0.1  | 1.5 ± 0.6 | 4.9 ± 1.1  |
| 20:1n-7DMA  | 0.6 ± 0.3  | 0 ± 0      | 0 ± 0      | 0 ± 0      | 0 ± 0      | 0 ± 0     | 1.2 ± 0.5  | 1.8 ± 1    | 7.1 ± 3     | 0.2 ± 0.1  | 0.2 ± 0.2  | 1.5 ± 0.8 | 0 ± 0      | 0.1 ± 0.1 | 1.2 ± 0.2  |
| ∑ DMA FA    | 1.7 ± 0.7  | 0.3 ± 0.2  | 0 ± 0      | 1.3 ± 0.5  | 0.2 ± 0.1  | 0 ± 0     | 3.1 ± 1.4  | 6.2 ± 3    | 20.9 ± 8.9  | 1.5 ± 0.7  | 1.4 ± 1    | 6 ± 1.8   | 1.1 ± 0.5  | 4.9 ± 2.9 | 13.7 ± 3   |
| A           | 0.3 ± 0.1  | 0.2 ± 0.2  | 0.1 ± 0.2  | 0.2 ± 0    | 0.4 ± 0.1  | 0 ± 0     | 0.2 ± 0    | 0.3 ± 0.4  | 0 ± 0       | 0.2 ± 0.1  | 0.3 ± 0.1  | 0.1 ± 0.2 | 0.1 ± 0.1  | 0 ± 0     | 0 ± 0      |
| B           | 0.2 ± 0    | 0 ± 0      | 0 ± 0      | 0.2 ± 0    | 0.1 ± 0.1  | 0 ± 0     | 0.1 ± 0.1  | 0 ± 0      | 0.2 ± 0.3   | 0 ± 0.1    | 0.1 ± 0.1  | 0.2 ± 0.4 | 0.1 ± 0    | 0 ± 0     | 0 ± 0      |
| W           | 0.3 ± 0.1  | 0.6 ± 0.1  | 0.1 ± 0.3  | 0.3 ± 0.1  | 0.7 ± 0.2  | 0 ± 0     | 0.2 ± 0.2  | 0.4 ± 0.2  | 0 ± 0       | 0.3 ± 0.1  | 0.3 ± 0.1  | 0.1 ± 0.2 | 0.2 ± 0    | 0.2 ± 0   | 0.1 ± 0.1  |
| ∑ UK FA     | 0.8 ± 0.1  | 0.8 ± 0.2  | 0.2 ± 0.4  | 0.6 ± 0.1  | 1.1 ± 0.3  | 0 ± 0     | 0.5 ± 0.2  | 0.7 ± 0.6  | 0.2 ± 0.3   | 0.5 ± 0.1  | 0.6 ± 0.1  | 0.4 ± 0.4 | 0.3 ± 0.1  | 0.2 ± 0.1 | 0.1 ± 0.1  |
| PUFA/SFA    | 1.5 ± 0.3  | 0.7 ± 0.2  | 0.3 ± 0.1  | 1.7 ± 0.3  | 1.3 ± 0.3  | 0.2 ± 0   | 1.8 ± 0.2  | 1.2 ± 0.1  | 0.8 ± 0.5   | 1.6 ± 0.2  | 1.6 ± 0.6  | 0.9 ± 0.2 | 1.6 ± 0.2  | 1.9 ± 0.2 | 1.7 ± 0.2  |
| EPA/DHA     | 1.1 ± 0.1  | 1.2 ± 0.2  | 1.3 ± 0.1  | 1.1 ± 0.1  | 1.4 ± 0.2  | 1.3 ± 0.1 | 1.1 ± 0.1  | 1 ± 0.2    | 0.8 ± 0.3   | 1.2 ± 0.2  | 1.4 ± 0.1  | 1.1 ± 0.2 | 2.5 ± 0.5  | 3.8 ± 0.3 | 4 ± 0.6    |
| ∑ n-3/∑ n-6 | 3.7 ± 1    | 1.5 ± 0.1  | 1.4 ± 0.4  | 4.5 ± 0.6  | 2.6 ± 0.5  | 2.8 ± 0.7 | 4.5 ± 0.5  | 3.6 ± 0.3  | Inf ± NA    | 4.6 ± 0.9  | 5.9 ± 0.4  | 5.5 ± 2.8 | 5.6 ± 1.1  | 5.3 ± 1.9 | 2.2 ± 0.5  |

915

916

917 **Table S5: Stable isotope (mean  $\pm$  SD, n = 5) composition of the three ontogenic stages of *Crepidula fornicata* (motile males, sessile males, sessile females)**  
 918 **over the sampling survey.**

|                       | S1 = 26 <sup>th</sup> February |                 |                 | S2 = 21 <sup>th</sup> March |                 |                 | S3 = 28 <sup>th</sup> March |                 |                 | S4 = 12 <sup>th</sup> April |                 |                 | S5 = 14 <sup>th</sup> June |                 |                 |
|-----------------------|--------------------------------|-----------------|-----------------|-----------------------------|-----------------|-----------------|-----------------------------|-----------------|-----------------|-----------------------------|-----------------|-----------------|----------------------------|-----------------|-----------------|
|                       | Sessile female                 | Sessile male    | Motile male     | Sessile female              | Sessile male    | Motile male     | Sessile female              | Sessile male    | Motile male     | Sessile female              | Sessile male    | Motile male     | Sessile female             | Sessile male    | Motile male     |
| $\delta^{13}\text{C}$ | -19.5 $\pm$ 0.3                | -19.4 $\pm$ 0.4 | -19.4 $\pm$ 0.5 | -19.8 $\pm$ 0.3             | -19.7 $\pm$ 0.3 | -20.1 $\pm$ 0.5 | -19.2 $\pm$ 0.6             | -19.6 $\pm$ 0.4 | -19.9 $\pm$ 0.3 | -20.1 $\pm$ 0.4             | -20.3 $\pm$ 0.8 | -20.6 $\pm$ 0.5 | -18.1 $\pm$ 0.3            | -18.5 $\pm$ 0.1 | -18.5 $\pm$ 0.3 |
| $\delta^{15}\text{N}$ | 9.3 $\pm$ 0.4                  | 8.9 $\pm$ 0.8   | 8.9 $\pm$ 0.3   | 9.6 $\pm$ 0.5               | 8.9 $\pm$ 0.5   | 8.4 $\pm$ 1.1   | 9.7 $\pm$ 0.3               | 9.4 $\pm$ 0.6   | 8.5 $\pm$ 0.4   | 8.4 $\pm$ 0.7               | 8.4 $\pm$ 0.6   | 8.3 $\pm$ 0.5   | 8.6 $\pm$ 0.6              | 8.3 $\pm$ 0.5   | 7.5 $\pm$ 0.3   |
| C/N                   | 4 $\pm$ 0.3                    | 3.8 $\pm$ 0.8   | 4 $\pm$ 0.2     | 3.2 $\pm$ 0.8               | 3.8 $\pm$ 0.6   | 3.5 $\pm$ 0.7   | 3.6 $\pm$ 0.4               | 3.3 $\pm$ 0.4   | 3.8 $\pm$ 0.2   | 3.6 $\pm$ 0.4               | 4.3 $\pm$ 0.2   | 3.8 $\pm$ 0.2   | 3.5 $\pm$ 0.6              | 4.1 $\pm$ 1.2   | 3.4 $\pm$ 0.3   |

919

920

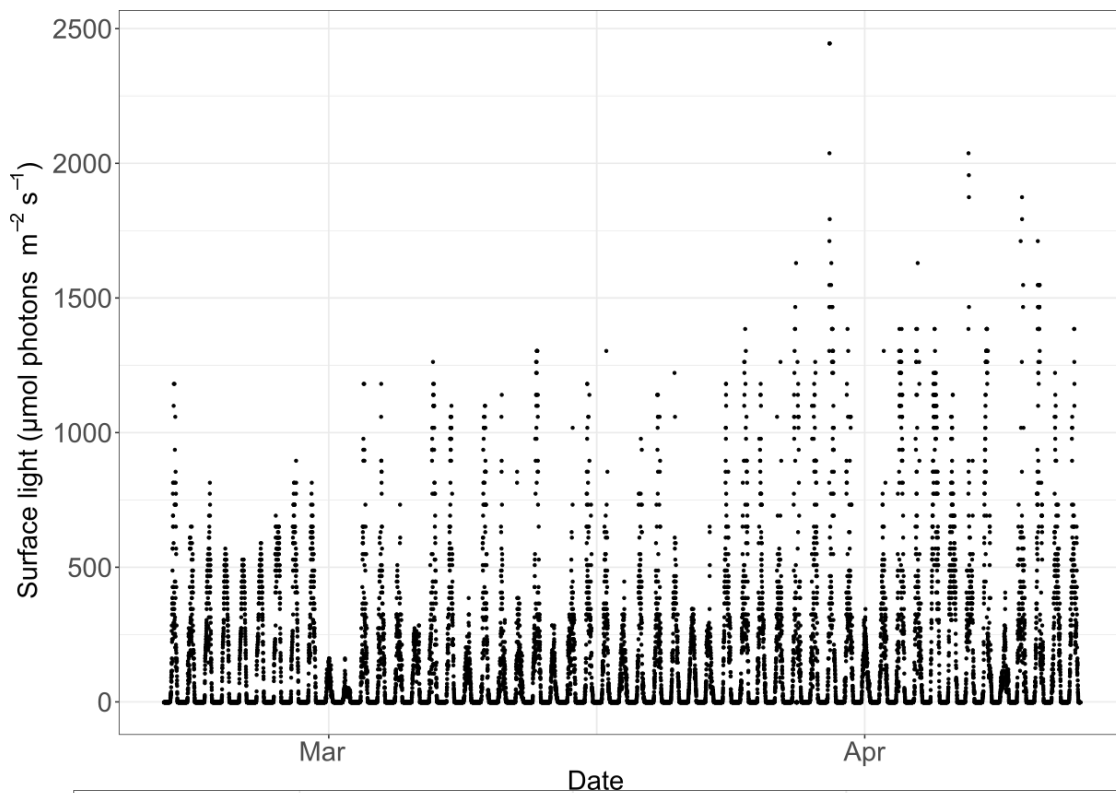

921

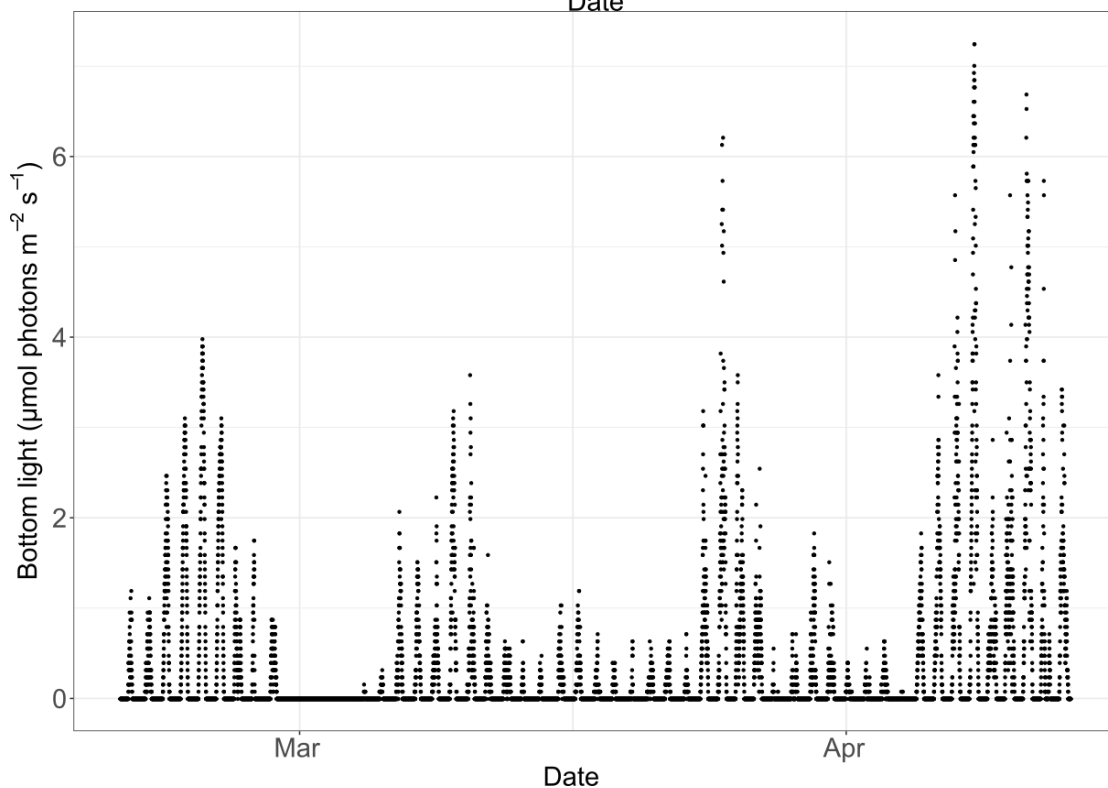

922

923

924

**Figure S1: Photosynthetic available radiations (PAR) at the surface and at the bottom of our study site.**

925

926

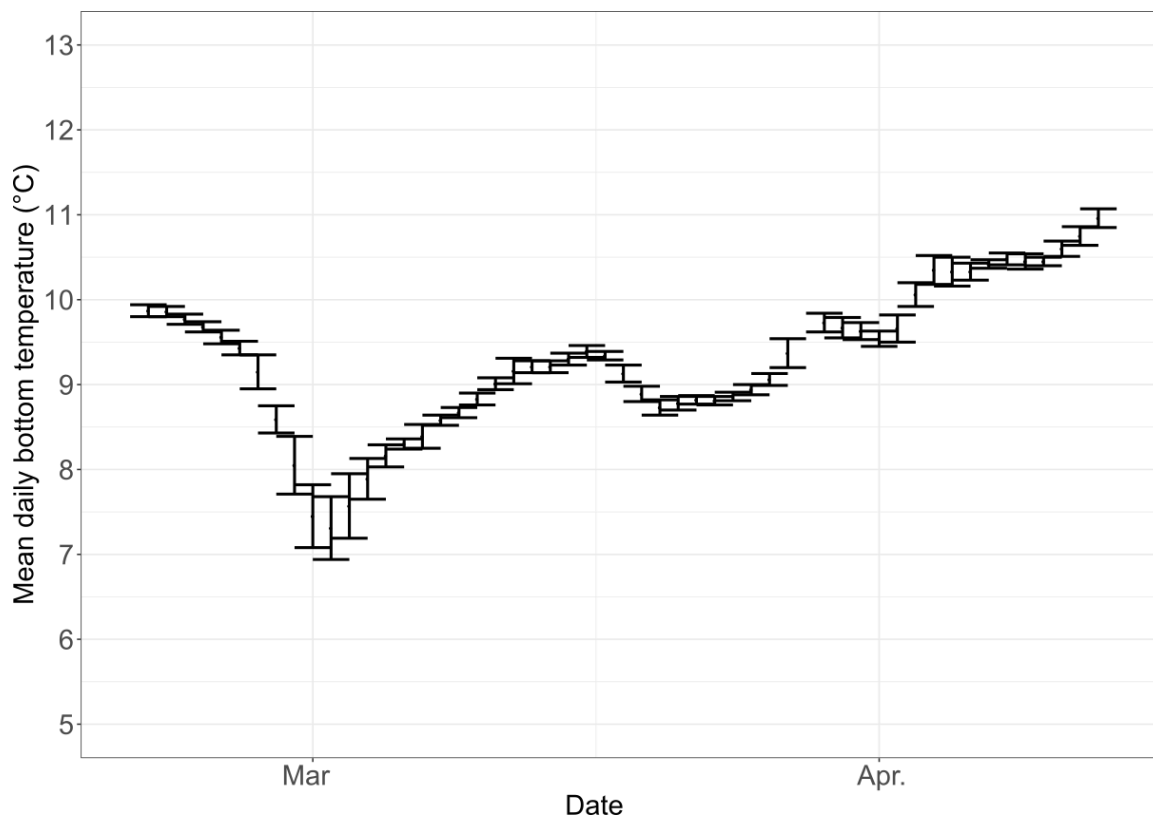

927  
928  
929

Figure S2: Mean daily temperature ( $\pm$  SD) at the bottom in our study site
